# Supplementary material for: Global distribution and diversity of Chaetoceros (Bacillariophyta, Mediophyceae): integration of classical and novel strategies
Source: PubMed Central journal article supplement (PMC6705385; doi:10.7717/peerj.7410), 2019-08-19

Article S1. Distribution maps of *Chaetoceros* species using OSD and Tara Oceans datasets.

OSD (blue dots) and Tara Oceans (red dots) stations.

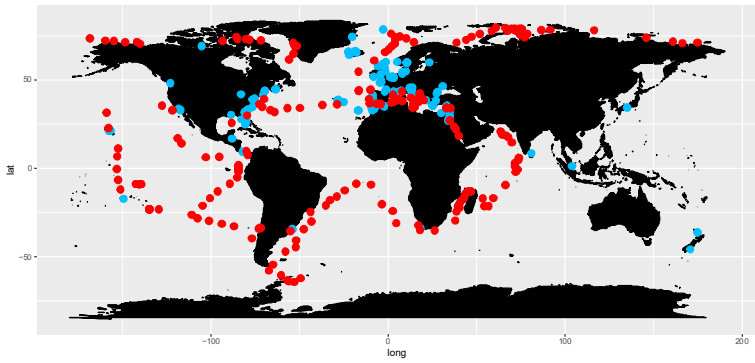

*C. affinis*

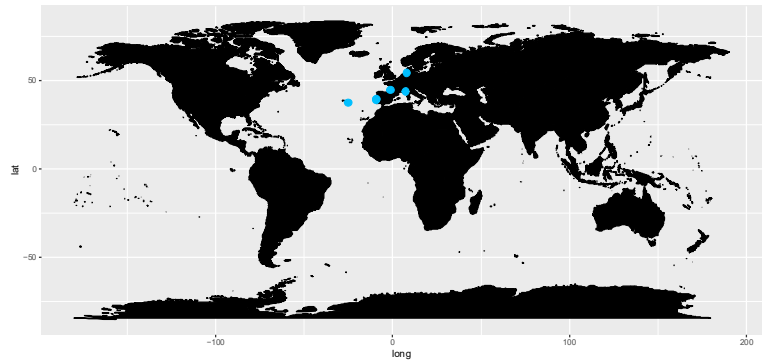

*C. anastomosans*

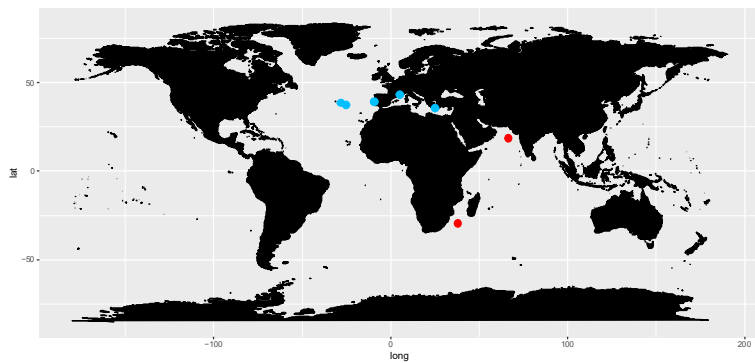

*C. atlanticus*

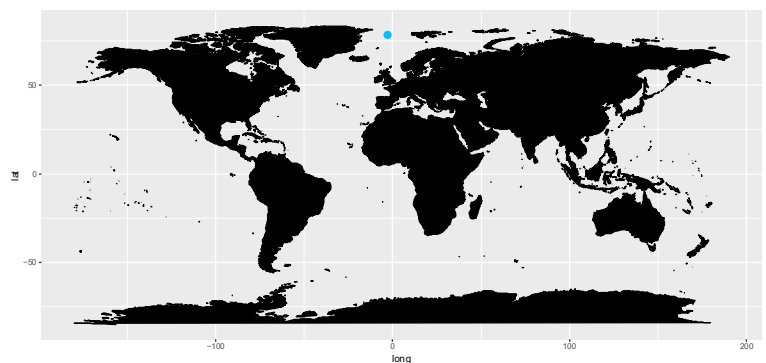

*C. brevis* 1

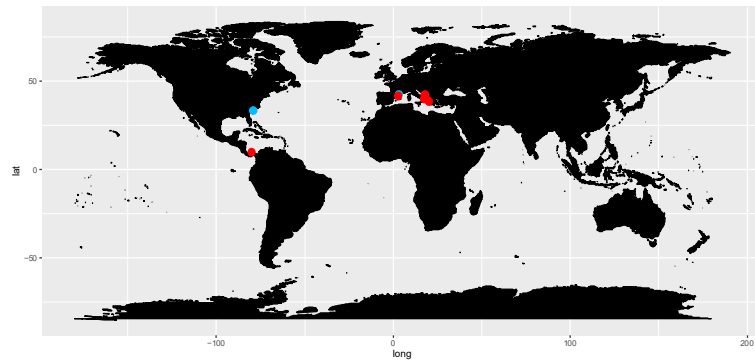

*C. brevis* 2

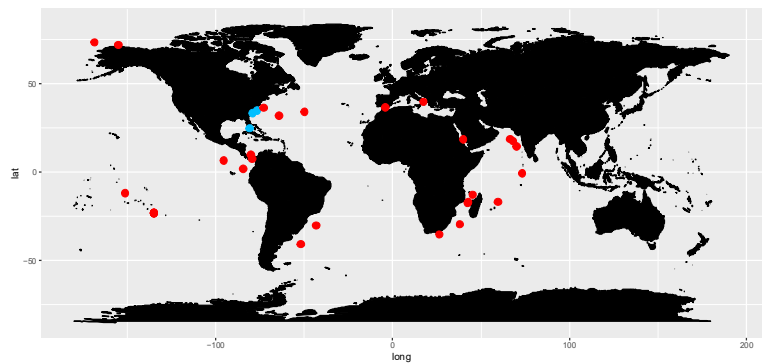

*C. brevis* 3

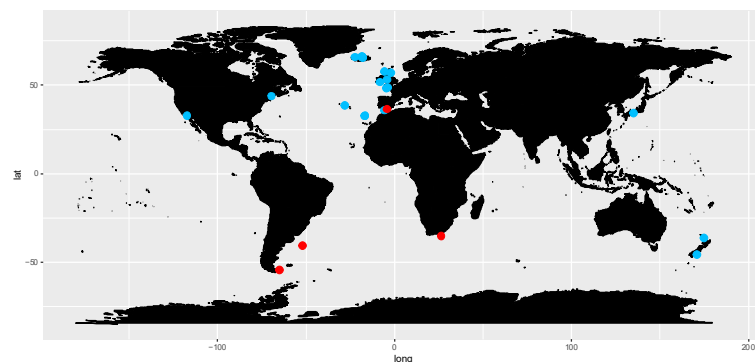

*C. cf. convolutus*

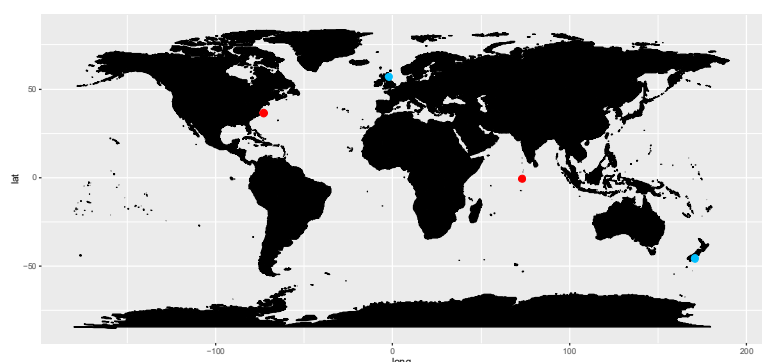

*C. cf. pseudodichaeta*

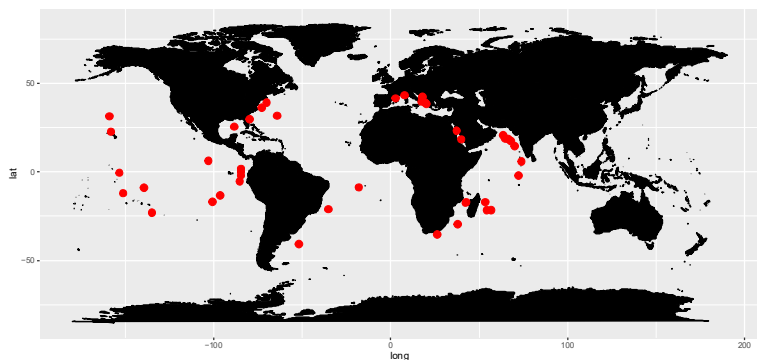

*C. cf. tortissimus*

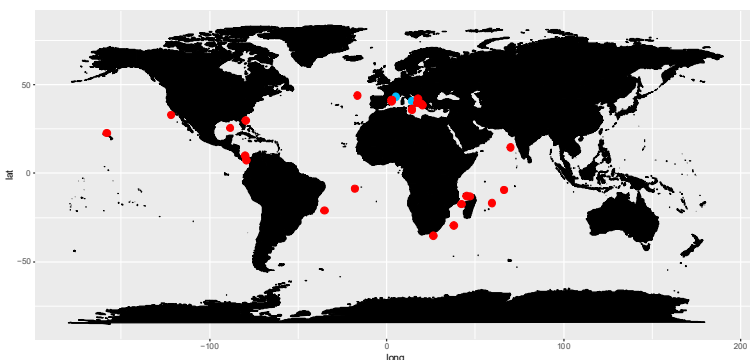

*C. cf. vixvisibilis*

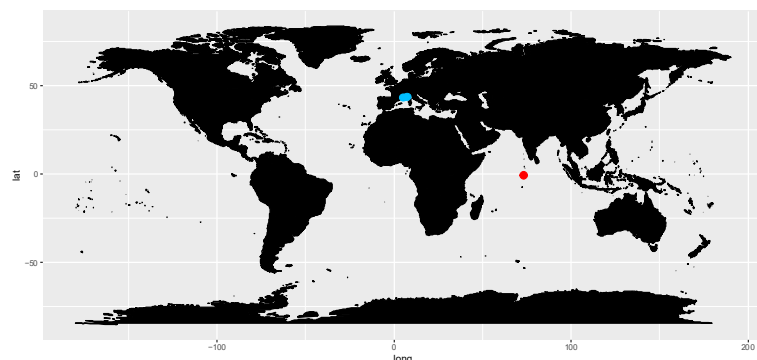

*C. cinctus*

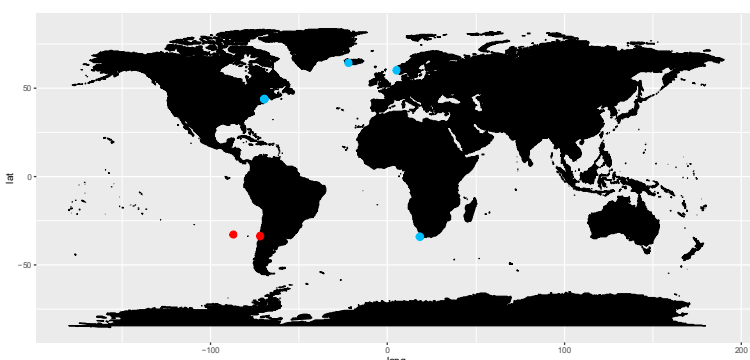

Note: Tara Oceans distribution (red dot) might refer to *C. sp. Na28A1* due to identical reference sequences in Tara Oceans dataset.

*C. circinalis*

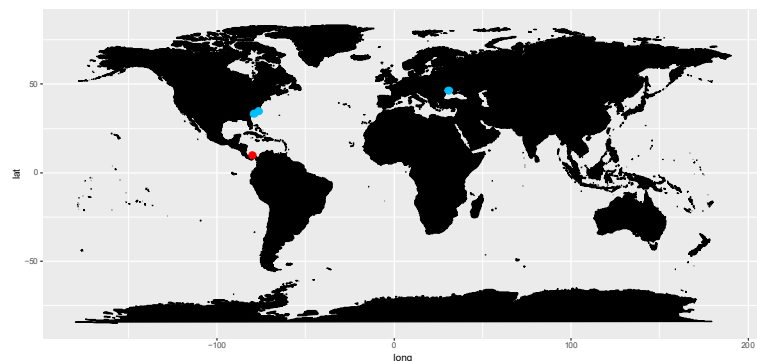

*C. constrictus*

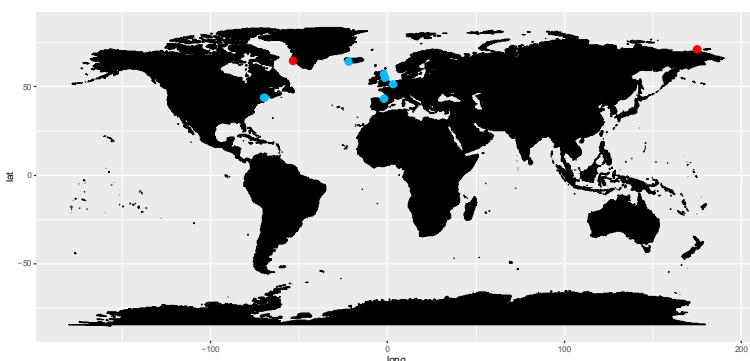

*C. contortus*

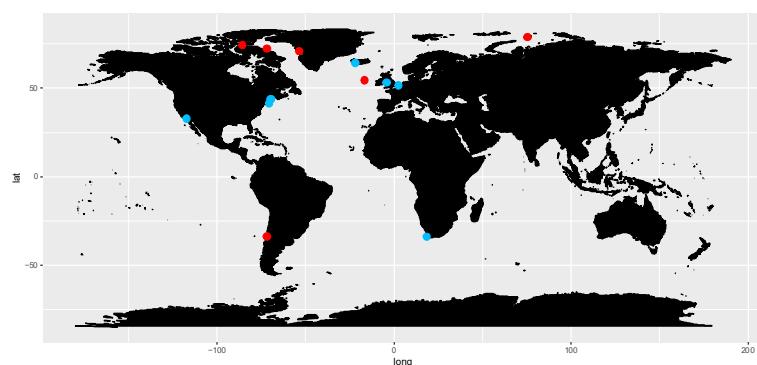

*C. contortus* cf. var. *contortus*

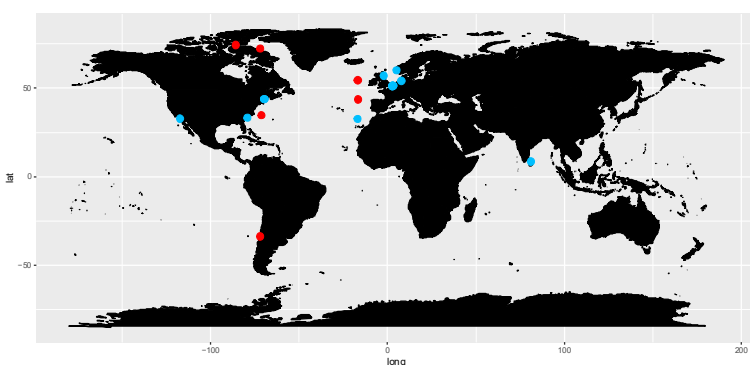

*C. costatus*

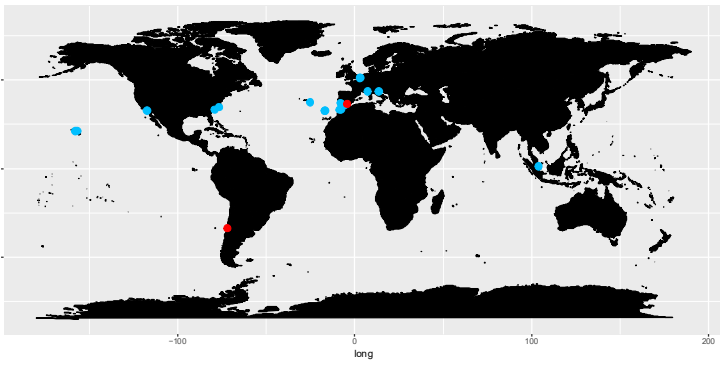

*C. curvisetus* 1

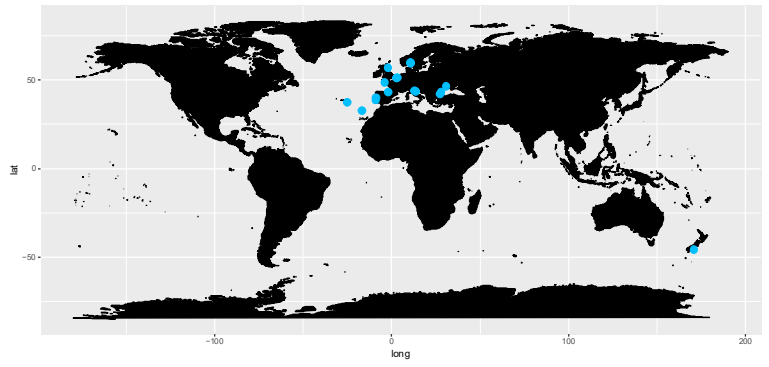

*C. curvisetus* 2

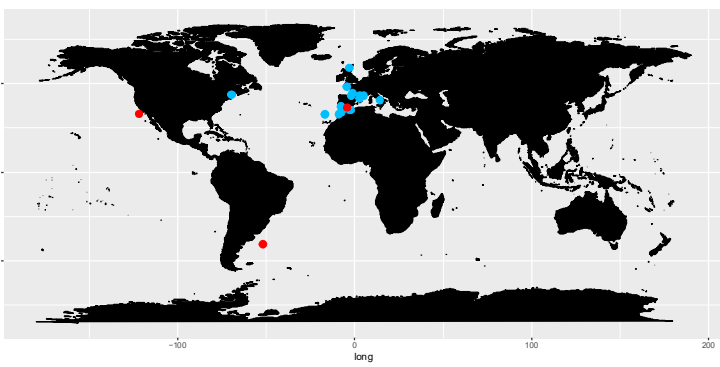

*C. curvisetus* 3

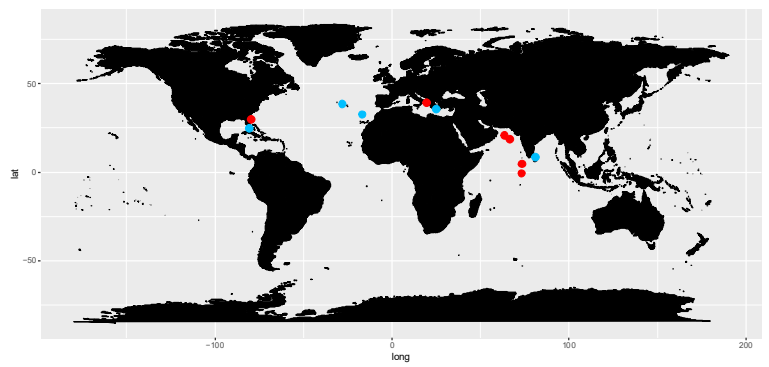

*C. danicus* (strain newCB1)

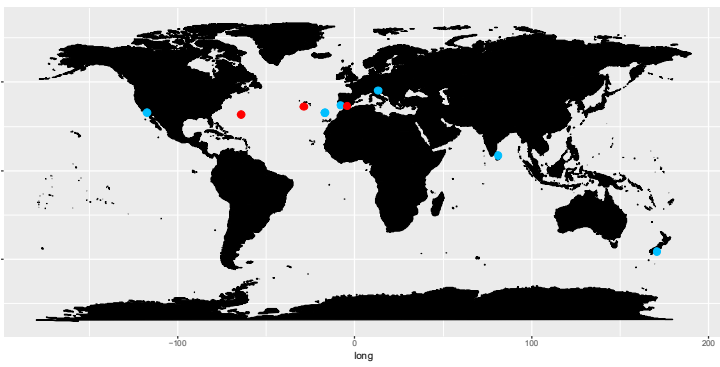

*C. danicus* (strain RCC2565)

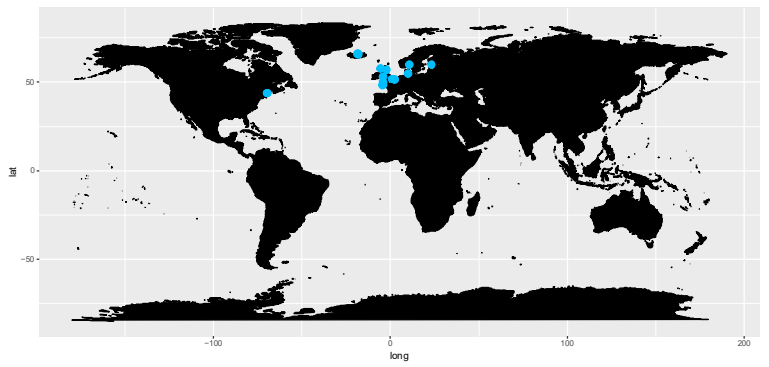

*C. debilis* 1

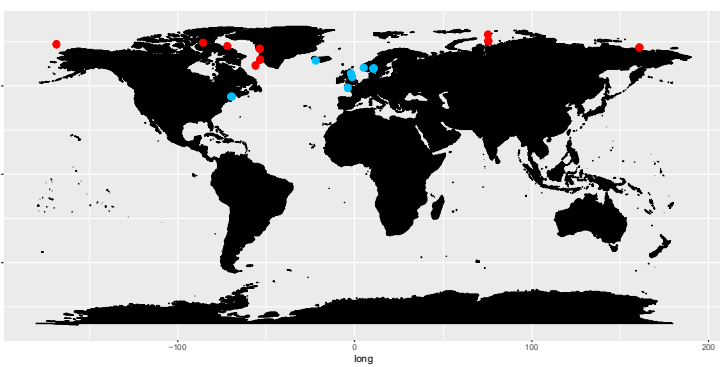

*C. debilis* 2 (strain L38-A2)

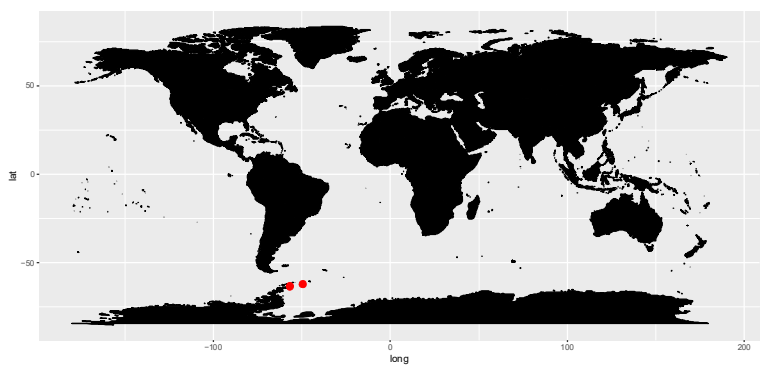

*C. debilis* 2 (strain MM24-A3)

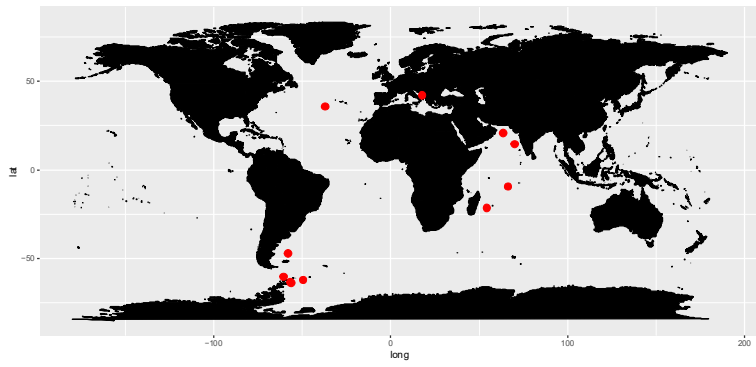

*C. debilis* 3

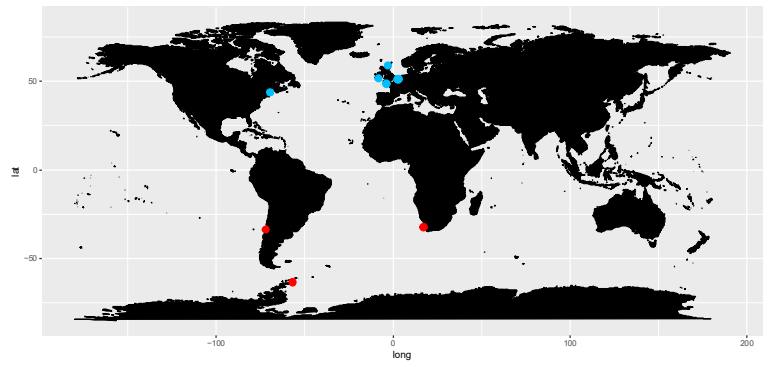

*C. decipiens*

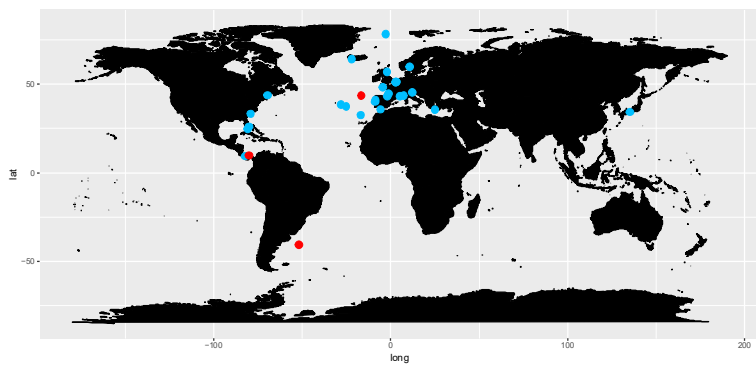

*C. diadema* 1

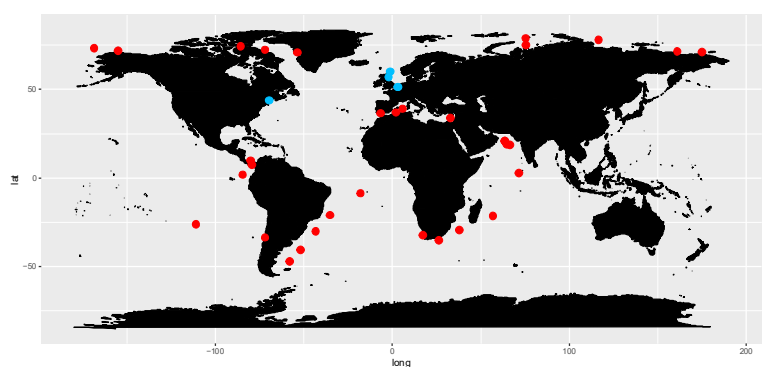

*C. diadema* 2

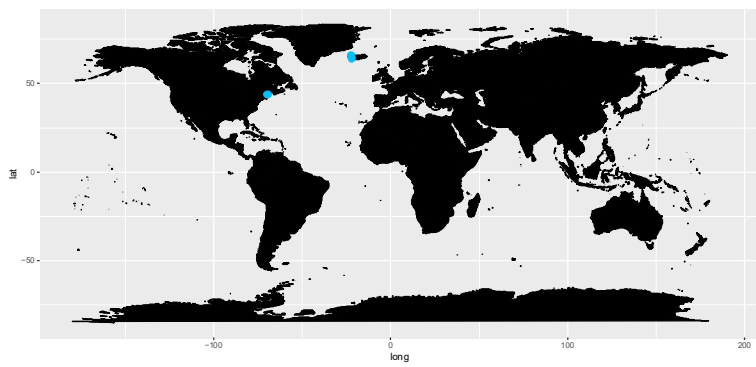

*C. dichæta*

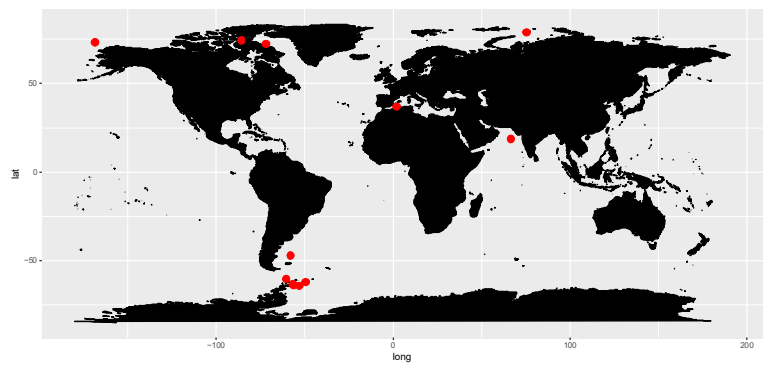

*C. dichatoensis*

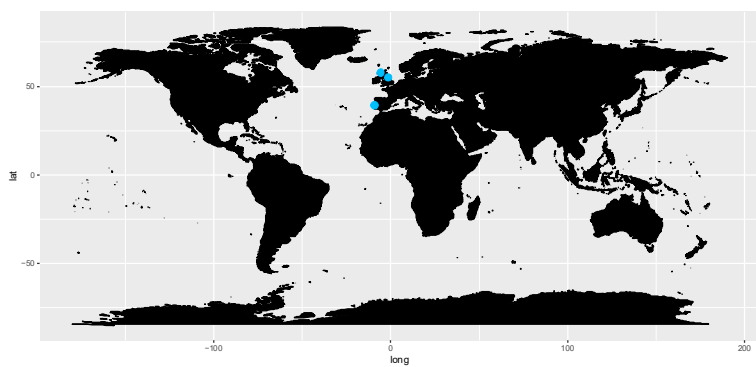

*C. didymus* 1

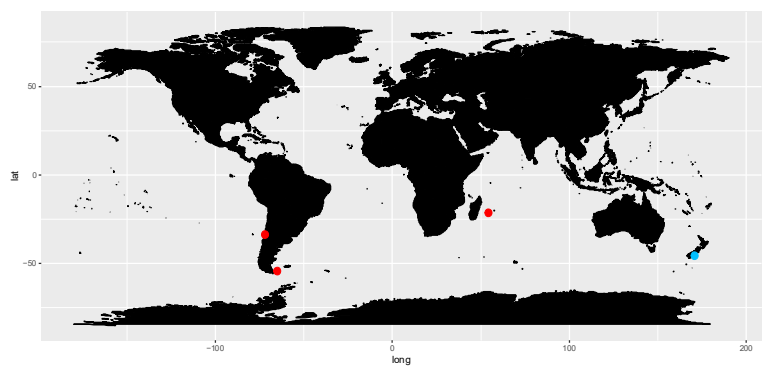



*C. didymus* 2

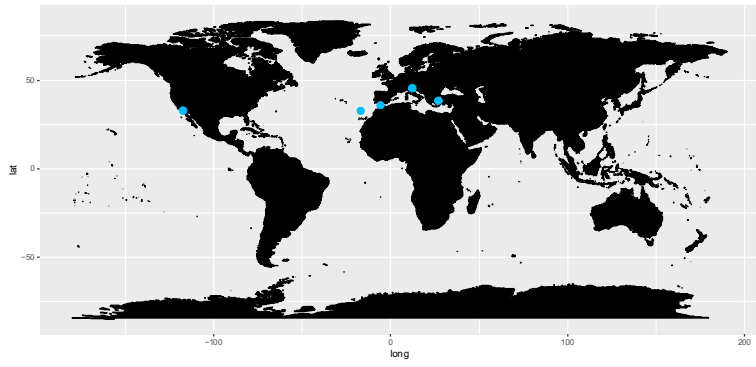

*C. diversus* 1

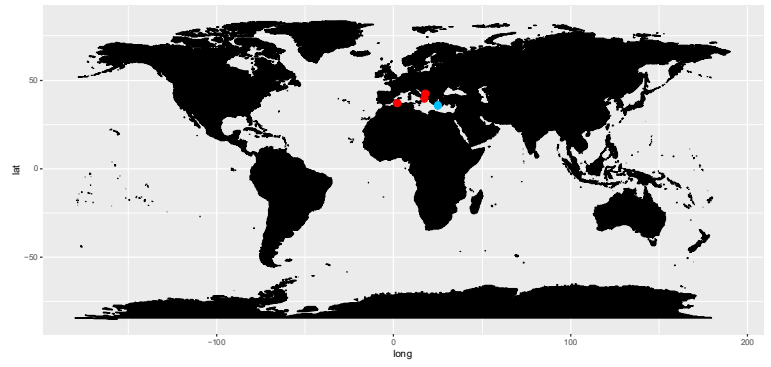

*C. diversus* 2

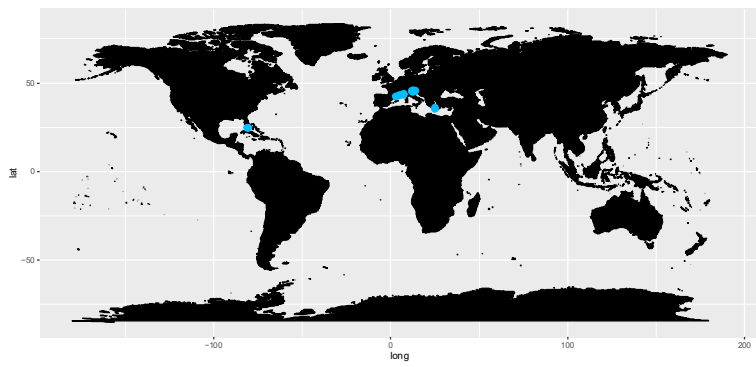

*C. eibenii*

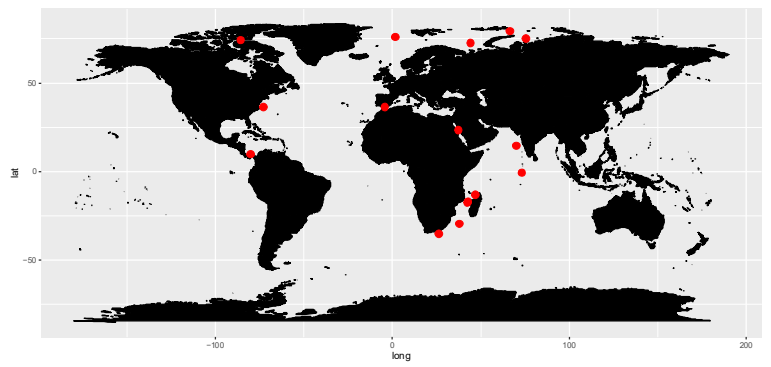

*C. elegans* (strain Ch12A1)

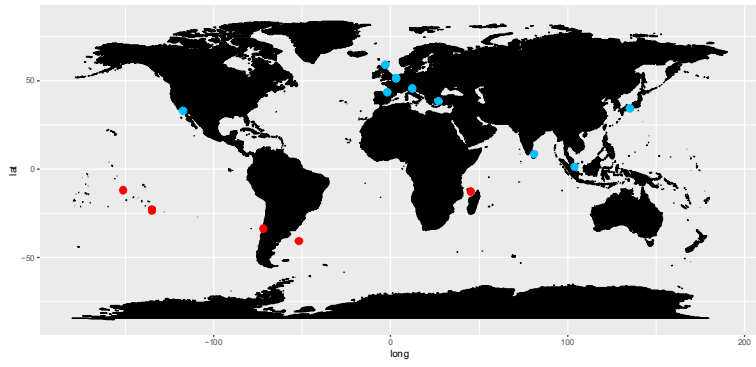

*C. elegans* (strain MC1001)

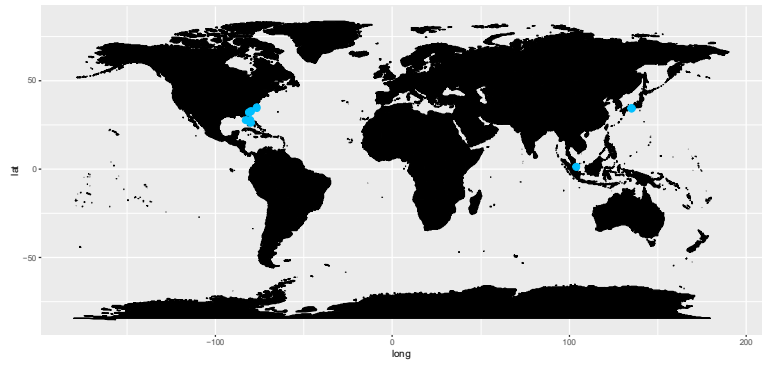

*C. elegans* (strain MC785)

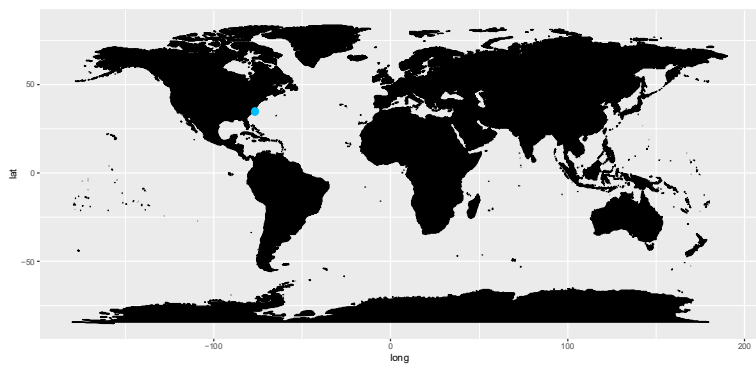

*C. gelidus*

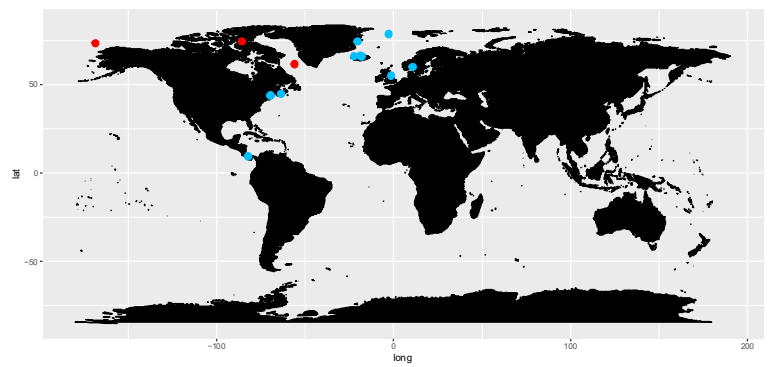

*C. lauderi*

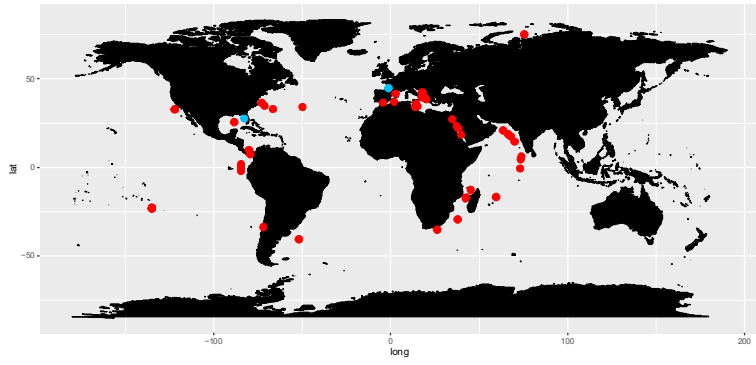

*C. lorenzianus 1*

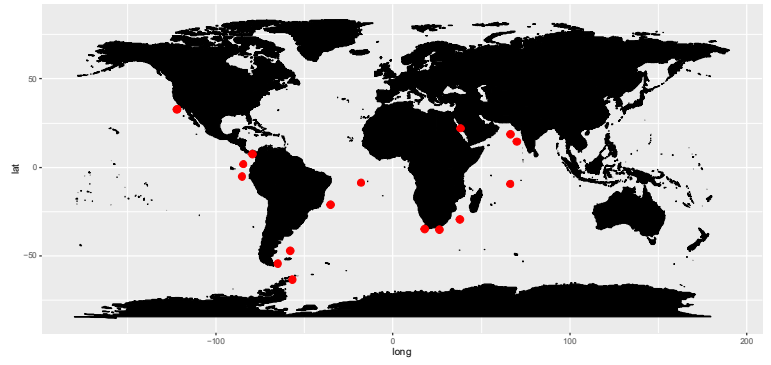

*C. lorenzianus 2*

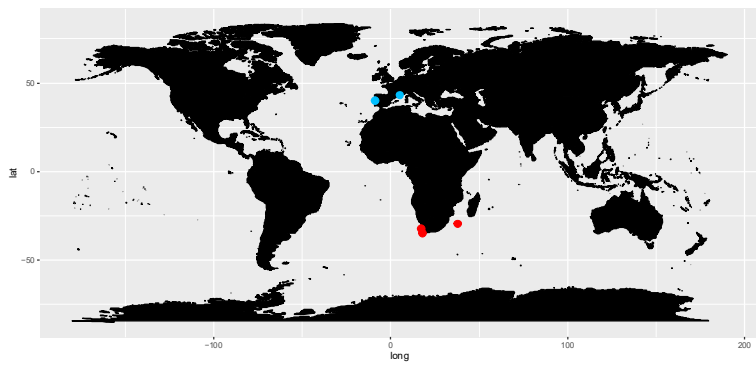

*C. mannaii*

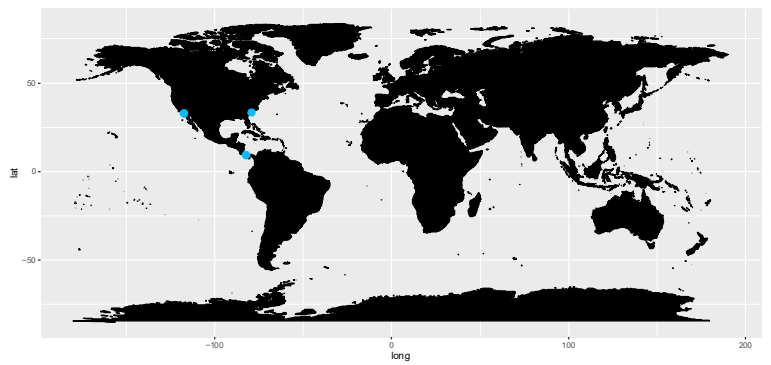

*C. minimus*

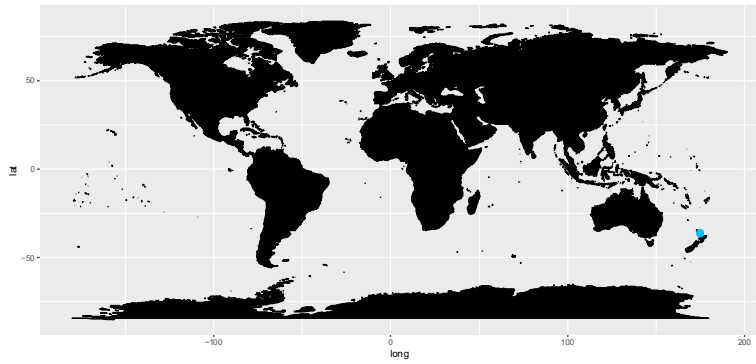

*C. neogracilis*

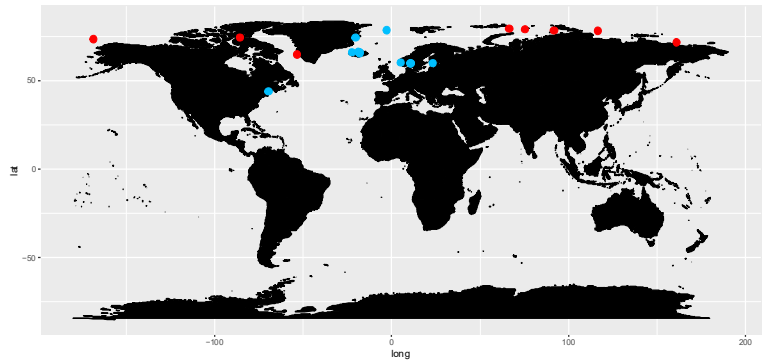

*C. peruvianus 1*

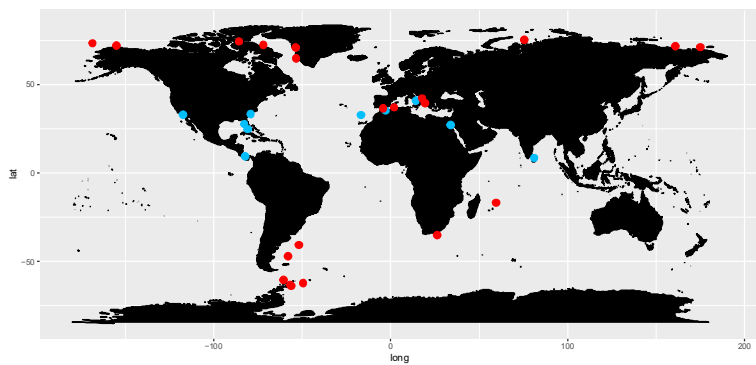

*C. peruvianus 2*

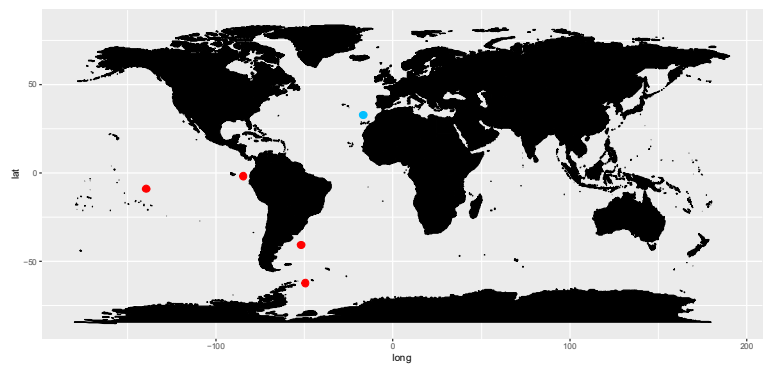

*C. protuberans* (strain Bristol)

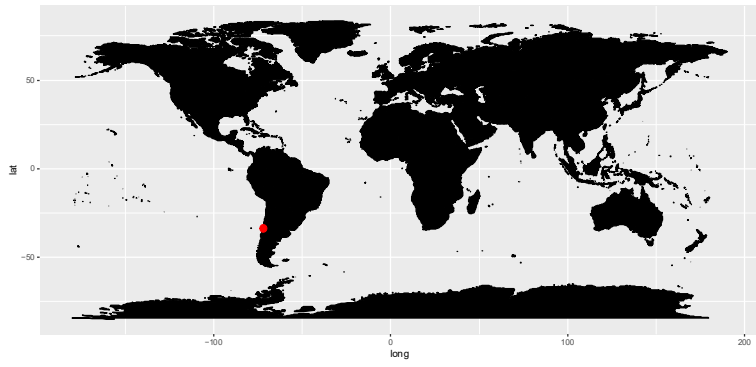

*C. protuberans* (strain newJC4)

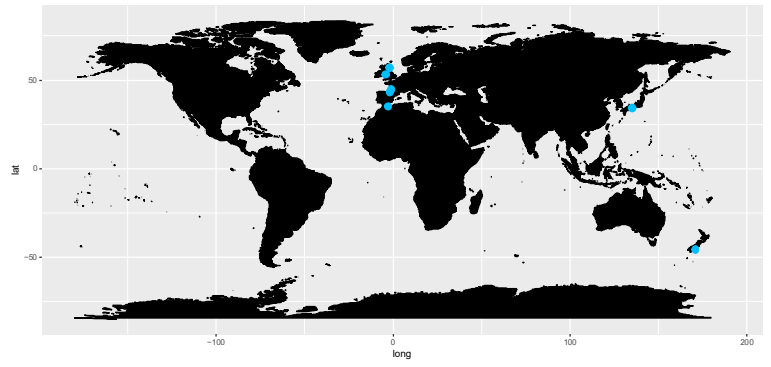

*C. pseudocurvisetus*

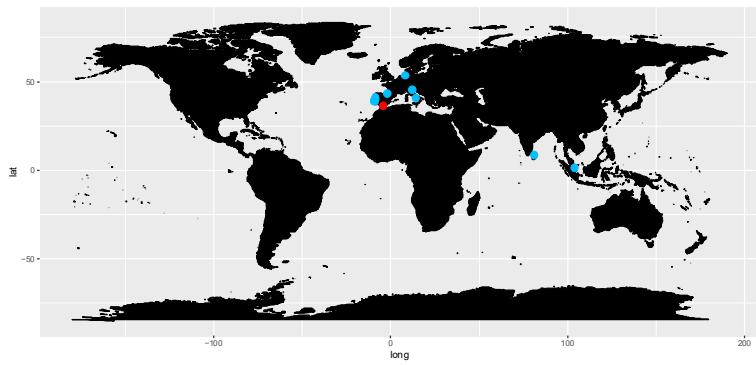

*C. radicans* (strain CCMP197)

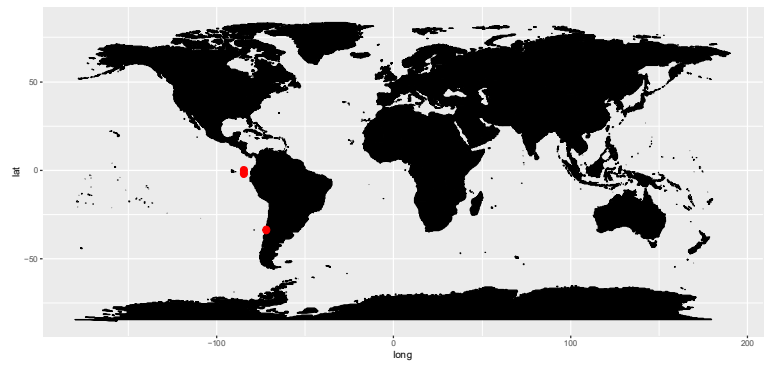

*C. radicans* (strain Ch11A4)

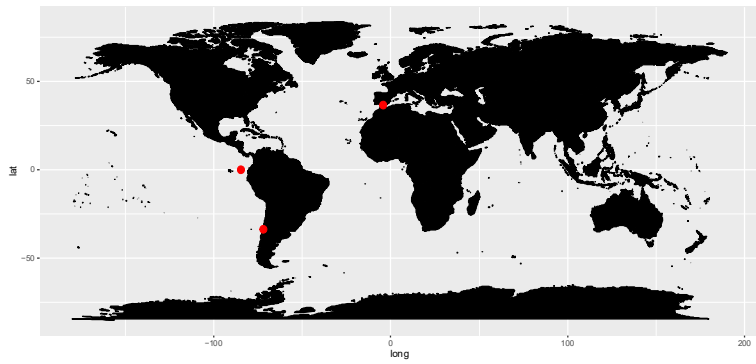

*C. rostratus*

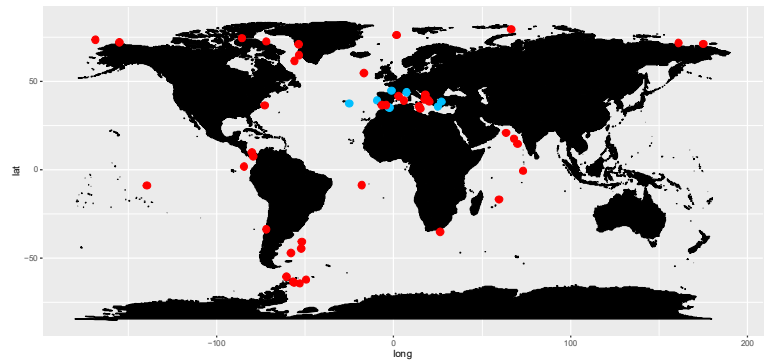

*C. rotozporus*

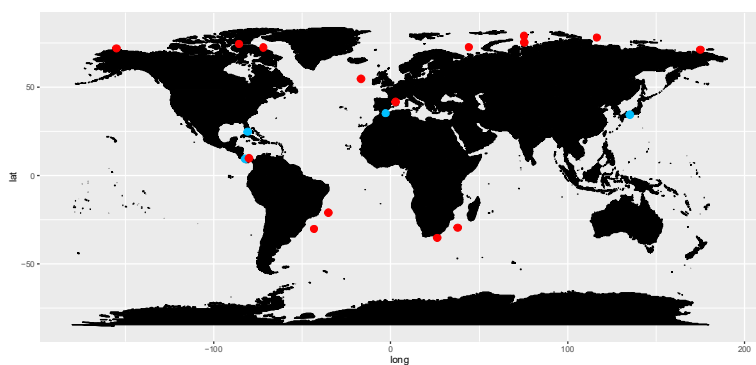

*C. seiracanthus*

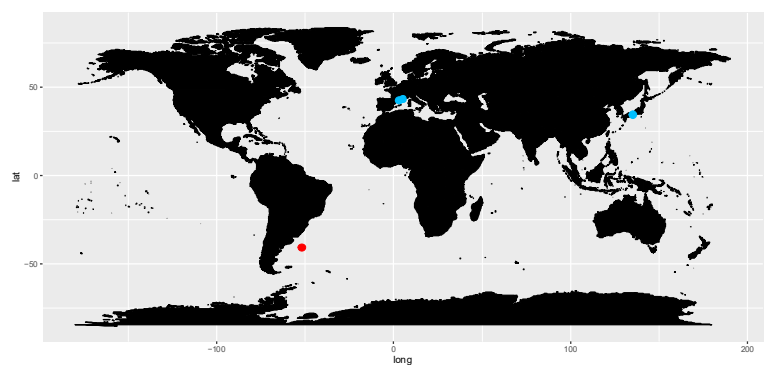

*C. socialis*

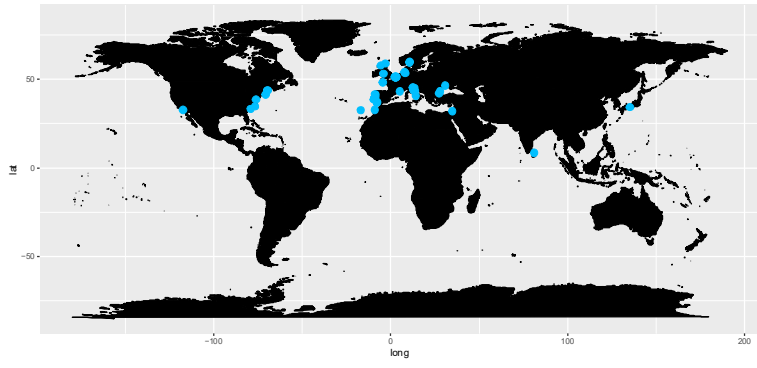

*C. sp. Clade CDP22*

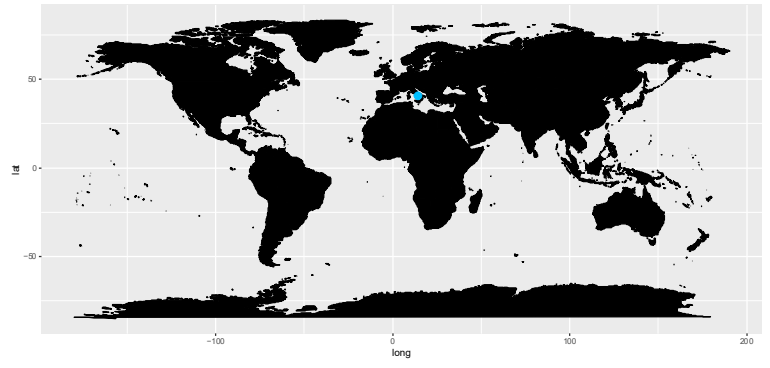

*C. sp. Clade Na11C3*

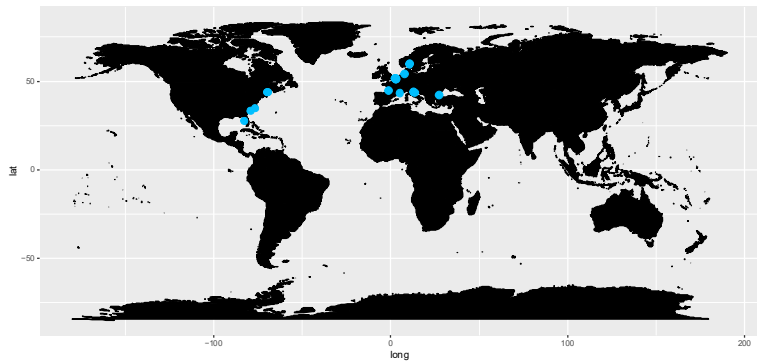

*C. sp. Clade Na12A3*

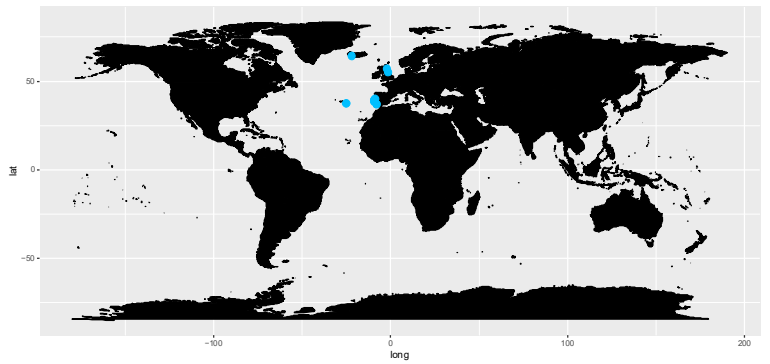

*C. sp. Clade Na13C1*

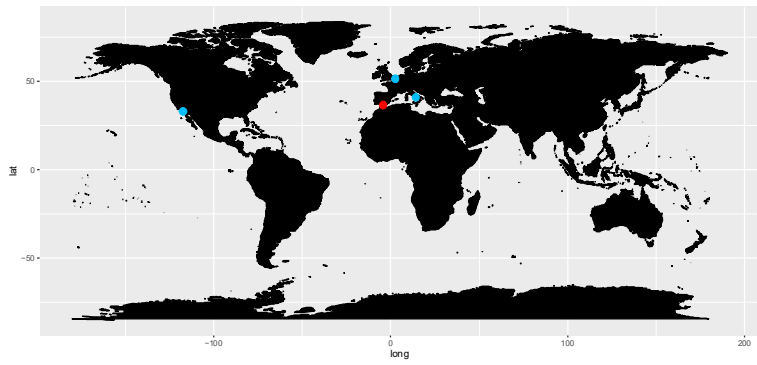

*C. sp. Clade Na17B2*

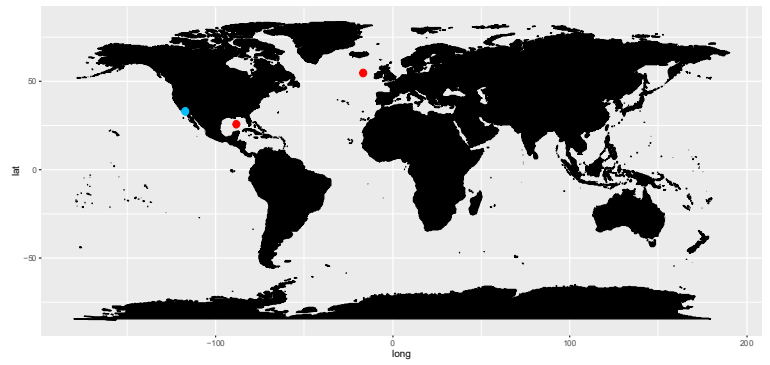

*C. sp. Clade Na26B1*

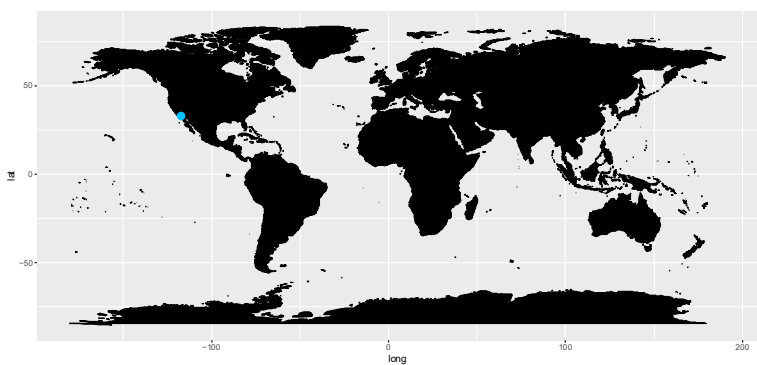

*C. sp. Clade Na28A1*

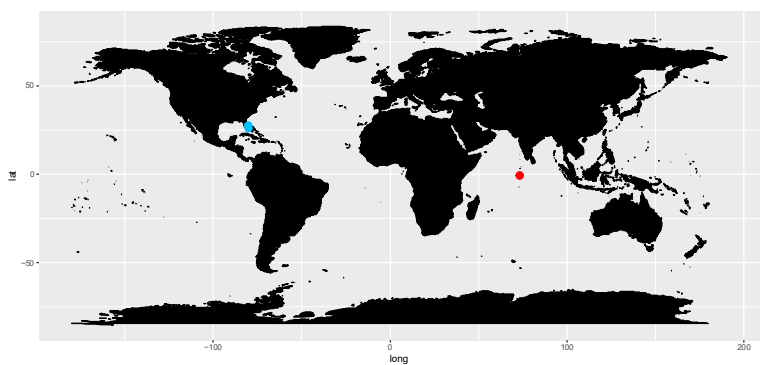

Note: Tara Oceans distribution (red dot) might refer to *C. cf. vixvisibilis* due to identical reference sequences in Tara Oceans dataset.

*C. sp. Clade VA7D2*

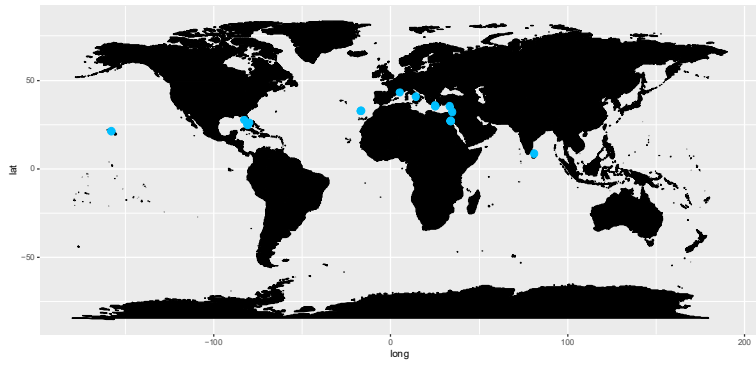

*C. sporotruncatus*

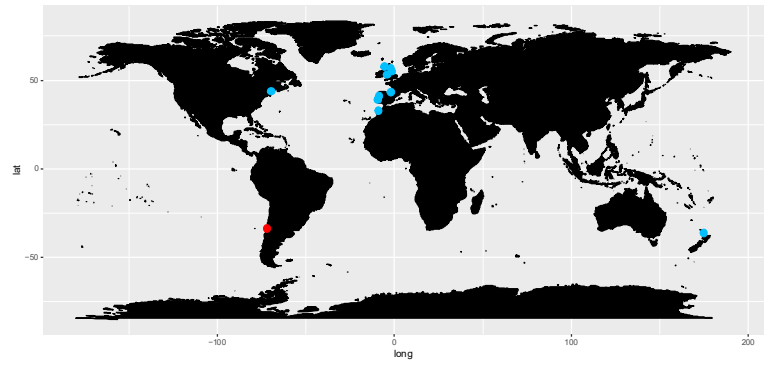

*C. tenuissimus*

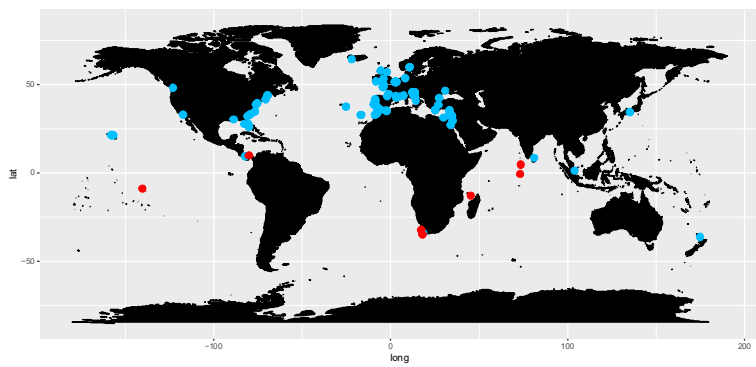

*C. teres*

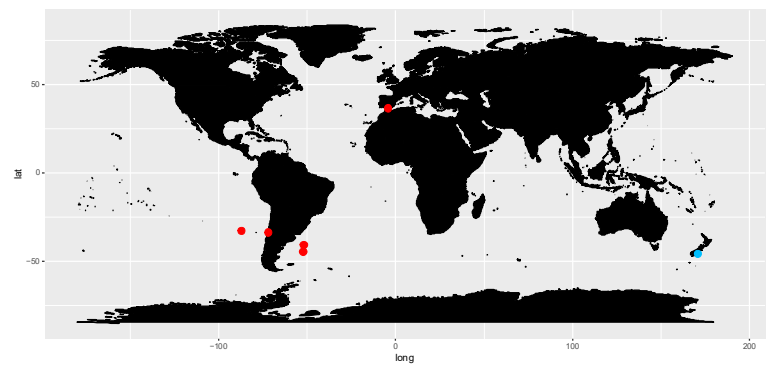

*C. thronsenii*

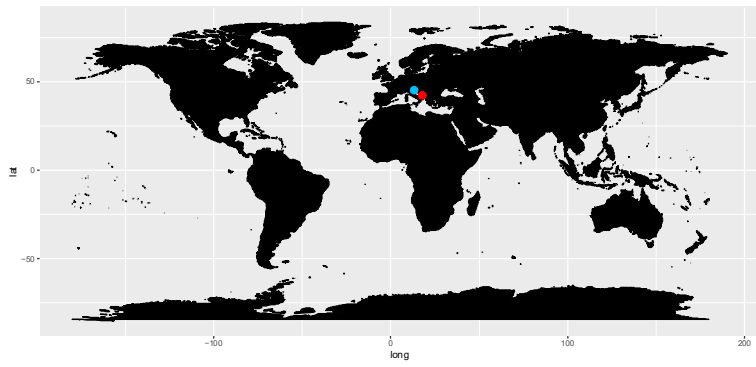

*C. tortissimus*

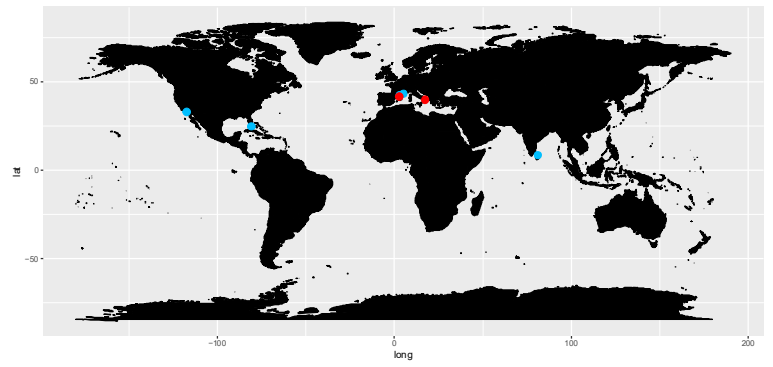

Supplement: peerj-07-7410-s011.pdf [file peerj-07-7410-s011.pdf]
