# Supplementary material for: Global distribution and diversity of Chaetoceros (Bacillariophyta, Mediophyceae): integration of classical and novel strategies
Source: PeerJ. 2019 Aug 19;7:e7410. doi: 10.7717/peerj.7410 (PMC6705385; doi:10.7717/peerj.7410)
Supplement: Table S3 — The raw data of the abundance of V4 reads of Chaetoceros species in each sampling locality. [file peerj-07-7410-s003.xlsx]

## Sheet: Table S3
Table S3. Chaetoceros-species OSD abundance table
Species	Representative_Sequence	total	OSD1	OSD100	OSD101	OSD102	OSD103	OSD106	OSD107	OSD108	OSD109	OSD110	OSD111	OSD113	OSD115	OSD116	OSD117	OSD118	OSD122	OSD123	OSD124	OSD125	OSD126	OSD127	OSD128	OSD129	OSD13	OSD130	OSD131	OSD132	OSD133	OSD14	OSD141	OSD143	OSD144	OSD145	OSD146	OSD147	OSD148	OSD15	OSD152	OSD153	OSD154	OSD155	OSD156	OSD157	OSD158	OSD159	OSD162
C. affinis Na27C2	OSD107_2014-06-20_0m_NPL022_HWI-M02024_112_000000000-ACJ3F_1_2102_28168_18236	79	0	0	0	0	0	0	1	0	0	0	0	0	0	1	0	0	0	0	0	0	0	0	0	0	0	0	0	0	0	0	0	0	0	0	0	0	0	1	0	0	4	0	0	0	71	0	0
C. anastomosans Na14C2	OSD115_2014-06-21_0m_NPL022_M01108_60_000000000-AD50T_1_2108_5662_18436	73	0	0	0	0	0	0	0	0	0	0	0	0	1	11	0	0	0	0	0	0	0	0	0	0	0	0	0	0	0	0	0	0	0	0	0	0	0	0	0	0	0	0	0	0	1	0	0
C. atlanticus 7C1	OSD146_2014-06-21_5m_NPL022_HWI-M02024_112_000000000-ACJ3F_1_2111_6627_10414	1	0	0	0	0	0	0	0	0	0	0	0	0	0	0	0	0	0	0	0	0	0	0	0	0	0	0	0	0	0	0	0	0	0	0	1	0	0	0	0	0	0	0	0	0	0	0	0
C. brevis 1 Na3C3	OSD14_2014-06-23_2m_NPL022_HWI-M02024_112_000000000-ACJ3F_1_1101_15813_19304	15	0	0	0	0	0	0	0	0	0	0	0	0	0	0	0	0	0	0	0	0	0	0	0	0	0	0	0	0	0	6	0	0	0	0	0	0	0	0	0	0	0	0	0	0	0	0	0
C. brevis 2 Na7C2	OSD38_2014-06-20_0m_NPL022_HWI-M02024_112_000000000-ACJ3F_1_1111_22649_9128	5	0	0	0	0	0	0	0	0	0	0	0	0	0	0	0	0	0	0	0	0	0	0	0	0	0	0	0	0	0	0	0	0	0	0	0	0	0	0	0	0	0	0	0	0	0	0	0
C. brevis 3 Ch9B3	OSD101_2014-06-21_0m_NPL022_HWI-M02024_112_000000000-ACJ3F_1_1112_12720_21210	834	0	0	1	25	0	11	0	0	0	0	0	0	0	0	0	1	0	0	1	0	109	13	31	484	0	78	0	0	0	0	0	0	0	0	0	0	0	0	0	0	0	0	0	0	0	3	4
C. cf. convolutus Ch5C4	OSD162_2014-06-23_1m_NPL022_HWI-M02024_112_000000000-ACJ3F_1_1103_13049_15857	37	0	0	0	0	0	0	0	0	0	0	0	0	0	0	0	0	0	0	0	0	0	0	0	0	0	0	0	0	0	0	0	0	0	0	0	0	0	0	0	0	0	0	0	0	0	0	20
C. cf. tortissimus Na26A2	OSD22_2014-06-23_1m_NPL022_HWI-M02024_112_000000000-ACJ3F_1_2109_17043_3394	4	0	0	0	0	0	0	0	0	0	0	0	0	0	0	0	0	0	0	0	0	0	0	0	0	0	0	0	0	0	0	0	0	0	0	0	0	0	0	0	0	0	0	0	0	0	0	0
C. cf. vixvisibilis Na16A3	OSD15_2014-06-21_0m_NPL022_HWI-M02024_112_000000000-ACJ3F_1_1112_10187_17202	470	0	0	0	0	0	0	0	0	0	0	0	0	0	0	0	0	0	0	0	0	0	0	0	0	0	0	0	0	0	0	0	0	0	0	0	0	0	1	0	0	0	0	0	0	0	0	0
C. cinctus Ch6A2	OSD133_2014-06-21_0m_NPL022_HWI-M02024_112_000000000-ACJ3F_1_1116_9851_7352	261	0	0	0	0	0	0	0	0	0	0	0	0	0	0	0	0	0	0	0	0	0	0	0	0	0	0	0	0	3	0	8	0	0	0	0	0	0	0	0	0	0	0	0	0	0	0	0
C. circinalis Na15C2	OSD58_2014-06-21_1m_NPL022_HWI-M02024_112_000000000-ACJ3F_1_1117_8270_15143	8	0	0	0	0	0	0	0	0	0	0	0	0	0	0	0	0	0	0	0	0	0	0	0	0	0	0	0	0	0	0	0	0	0	0	0	0	0	0	0	0	0	0	0	0	0	0	0
C. constrictus Ch12C1	OSD125_2014-06-21_0m_NPL022_HWI-M02024_112_000000000-ACJ3F_1_1114_18432_3685	224	0	0	0	0	0	0	0	0	0	0	0	0	0	0	0	0	0	0	0	2	0	0	0	0	0	0	0	0	0	0	0	0	0	1	0	0	0	0	0	0	0	0	0	0	0	0	142
C. contortus Ch8A1	OSD133_2014-06-21_0m_NPL022_HWI-M02024_112_000000000-ACJ3F_1_2108_20899_10180	84	0	0	0	0	0	0	0	0	0	0	0	0	0	0	0	0	0	0	0	0	0	0	0	0	0	0	0	0	1	0	0	0	0	0	0	0	0	0	0	0	0	0	0	0	0	0	0
C. contortus var. contortus Na30A1	OSD102_2014-06-21_0m_NPL022_HWI-M02024_112_000000000-ACJ3F_1_1105_8106_22668	199	0	0	0	2	0	0	0	0	0	0	0	0	0	0	0	0	0	0	0	0	0	0	0	0	0	0	0	0	0	0	3	0	0	63	0	11	0	0	0	0	0	0	0	0	0	0	10
C. costatus newDA4	OSD101_2014-06-21_0m_NPL022_HWI-M02024_112_000000000-ACJ3F_1_1109_10752_10485	79	0	0	4	25	0	0	0	0	0	0	0	0	0	0	0	0	0	0	0	0	0	0	0	0	0	0	0	0	0	0	0	0	0	3	0	0	0	3	0	1	0	0	0	0	7	0	0
C. curvisetus 1 Na10B4	OSD101_2014-06-21_0m_NPL022_HWI-M02024_112_000000000-ACJ3F_1_2112_29335_9971	914	0	0	1	0	0	0	0	0	1	1	0	0	0	0	0	0	0	0	0	0	0	0	0	0	2	0	2	0	0	0	0	0	0	1	0	0	0	0	0	0	0	4	428	9	23	0	414
C. curvisetus 2B. Ch5B1	OSD101_2014-06-21_0m_NPL022_HWI-M02024_112_000000000-ACJ3F_1_1104_12389_10156	667	0	0	17	30	0	0	0	0	0	0	0	0	0	0	1	0	0	0	0	0	0	0	0	0	0	0	0	0	0	0	0	0	0	0	0	0	0	0	0	8	3	0	0	0	0	1	0
C. curvisetus 3 newBB2	OSD102_2014-06-21_0m_NPL022_HWI-M02024_112_000000000-ACJ3F_1_1106_26791_21709	24	0	0	0	7	0	0	0	0	0	0	0	0	0	0	0	0	0	0	0	0	0	0	0	0	0	0	0	0	0	0	0	0	0	0	0	3	0	0	0	0	0	0	0	0	0	0	0
C. danicus newCB1	OSD101_2014-06-21_0m_NPL022_HWI-M02024_112_000000000-ACJ3F_1_1103_5358_4598	37	0	0	2	4	0	0	0	0	0	0	0	0	0	0	0	0	0	0	0	0	0	0	0	0	0	0	0	0	0	0	0	0	0	0	0	13	0	0	0	2	0	0	0	0	0	0	0
C. danicus RCC2565	OSD1_2014-06-21_0m_NPL022_M01108_60_000000000-AD50T_1_2106_5629_9061	332	1	0	0	0	0	0	0	0	0	0	0	0	0	0	0	0	0	0	0	0	9	0	0	8	0	3	0	0	0	0	0	0	0	0	0	0	0	0	0	0	0	0	2	0	0	6	262
C. debilis 1 Helgoland	OSD125_2014-06-21_0m_NPL022_HWI-M02024_112_000000000-ACJ3F_1_1119_22252_3160	64	0	0	0	0	0	0	0	0	0	0	0	0	0	0	0	0	0	0	0	4	0	0	0	0	0	0	0	0	0	0	13	0	0	0	0	0	0	0	0	0	0	0	2	15	0	0	10
C. debilis 3 Ch1A1	OSD118_2014-06-24_0.2m_NPL022_HWI-M02024_112_000000000-ACJ3F_1_1102_2570_10043	119	0	0	0	0	0	0	0	0	0	0	0	0	0	0	0	6	0	0	0	0	0	0	0	0	0	0	0	0	0	0	0	0	0	30	0	0	0	0	0	0	0	0	0	0	0	0	0
C. decipiens RCC1997	OSD102_2014-06-21_0m_NPL022_HWI-M02024_112_000000000-ACJ3F_1_1102_12303_12038	125	0	0	0	12	0	0	0	0	0	4	0	0	0	0	0	0	0	0	1	0	0	0	0	0	0	0	0	0	0	0	0	0	0	5	4	0	0	4	0	0	15	0	1	0	6	1	4
C. diadema 1 Na41A4	OSD145_2014-06-21_0m_NPL022_HWI-M02024_112_000000000-ACJ3F_1_1110_24158_14566	9	0	0	0	0	0	0	0	0	0	0	0	0	0	0	0	0	0	0	0	0	0	0	0	0	0	0	0	0	0	0	0	0	0	4	0	0	0	0	0	0	0	0	0	0	0	0	2
C. diadema 2 Ch1A3	OSD106_2014-06-20_15m_NPL022_HWI-M02024_112_000000000-ACJ3F_1_2113_5768_17179	44	0	0	0	0	0	1	0	0	0	0	0	0	0	0	0	0	0	0	0	0	0	0	0	0	0	0	0	0	0	0	0	0	0	0	0	0	0	0	0	0	0	0	0	0	0	0	0
C. dichatoensis Ch4A4	OSD116_2014-06-21_0m_NPL022_HWI-M02024_112_000000000-ACJ3F_1_1106_25608_13205	10	0	0	0	0	0	0	0	0	0	0	0	0	0	1	0	0	0	0	0	6	0	0	0	0	0	0	0	0	0	0	0	0	0	0	0	0	0	0	0	0	0	0	0	0	0	0	0
C. didymus 1 Ch6A3	OSD71_2014-06-21_0m_NPL022_HWI-M02024_112_000000000-ACJ3F_1_1110_6574_7685	3	0	0	0	0	0	0	0	0	0	0	0	0	0	0	0	0	0	0	0	0	0	0	0	0	0	0	0	0	0	0	0	0	0	0	0	0	0	0	0	0	0	0	0	0	0	0	0
C. didymus 2 Na20B4	OSD102_2014-06-21_0m_NPL022_HWI-M02024_112_000000000-ACJ3F_1_1106_16815_8273	25	0	0	0	11	0	0	0	0	0	0	0	0	0	0	0	0	0	0	0	0	0	0	0	0	0	0	0	0	0	0	0	0	0	0	0	0	0	0	0	0	0	0	0	0	0	0	0
C. diversus 1 Na15B4	OSD5_2014-06-19_75m_NPL022_HWI-M02024_112_000000000-ACJ3F_1_2108_15673_23178	1	0	0	0	0	0	0	0	0	0	0	0	0	0	0	0	0	0	0	0	0	0	0	0	0	0	0	0	0	0	0	0	0	0	0	0	0	0	0	0	0	0	0	0	0	0	0	0
C. diversus 2 Na55C1	OSD14_2014-06-23_2m_NPL022_HWI-M02024_112_000000000-ACJ3F_1_1101_18080_20701	202	0	0	0	0	0	0	0	0	0	0	0	0	0	0	0	0	0	0	0	0	0	0	0	0	0	0	0	0	0	86	0	0	0	0	0	0	0	2	0	0	0	0	0	0	0	0	0
C. elegans Ch12A1	OSD124_2014-06-21_5m_NPL022_HWI-M02024_112_000000000-ACJ3F_1_1101_15966_13168	49	0	0	0	0	0	0	0	0	0	0	0	0	0	0	0	0	0	0	1	0	0	0	0	0	0	0	0	0	0	0	0	0	0	1	0	29	0	0	0	0	0	0	0	0	0	0	0
C. elegans MC1001	OSD124_2014-06-21_5m_NPL022_HWI-M02024_112_000000000-ACJ3F_1_1101_27680_17478	234	0	0	0	0	0	0	0	0	0	0	0	0	0	0	0	0	0	0	7	0	0	0	0	0	0	0	0	0	0	0	0	28	0	0	0	0	0	0	0	0	0	0	0	0	0	0	0
C. elegans MC785	OSD58_2014-06-21_1m_NPL022_HWI-M02024_112_000000000-ACJ3F_1_2101_15910_10549	1	0	0	0	0	0	0	0	0	0	0	0	0	0	0	0	0	0	0	0	0	0	0	0	0	0	0	0	0	0	0	0	0	0	0	0	0	0	0	0	0	0	0	0	0	0	0	0
C. gelidus RCC1992	OSD106_2014-06-20_15m_NPL022_HWI-M02024_112_000000000-ACJ3F_1_1114_17284_9823	1273	0	0	0	0	0	1	0	0	0	0	0	0	0	0	0	0	0	0	0	2	0	2	0	12	0	5	0	0	0	0	0	0	0	0	168	0	0	0	3	0	0	0	5	0	0	0	0
C. lauderi Na13A4	OSD154_2014-06-20_1m_NPL022_HWI-M02024_112_000000000-ACJ3F_1_1117_8982_11917	7	0	0	0	0	0	0	0	0	0	0	0	0	0	0	0	0	0	0	0	0	0	0	0	0	0	0	0	0	0	0	0	0	0	0	0	0	0	0	0	0	2	0	0	0	0	0	0
C. lorenzianus 2 Ch3A4	OSD110_2014-06-21_0m_NPL022_HWI-M02024_112_000000000-ACJ3F_1_2114_15860_19196	2	0	0	0	0	0	0	0	0	0	1	0	0	0	0	0	0	0	0	0	0	0	0	0	0	0	0	0	0	0	0	0	0	0	0	0	0	0	0	0	0	0	0	0	0	0	0	0
C. mannaii MC1088	OSD43_2014-06-21_0m_NPL022_HWI-M02024_112_000000000-ACJ3F_1_1115_26577_21212	4	0	0	0	0	0	0	0	0	0	0	0	0	0	0	0	0	0	0	0	0	0	0	0	0	0	0	0	0	0	0	0	0	0	0	0	0	0	0	0	0	0	0	0	0	0	0	0
C. minimus MC755	OSD65_2014-06-20_0.1m_NPL022_HWI-M02024_112_000000000-ACJ3F_1_2114_8467_4958	1	0	0	0	0	0	0	0	0	0	0	0	0	0	0	0	0	0	0	0	0	0	0	0	0	0	0	0	0	0	0	0	0	0	0	0	0	0	0	0	0	0	0	0	0	0	0	0
C. neogracilis 2 RCC2318	OSD106_2014-06-20_0m_NPL022_HWI-M02024_112_000000000-ACJ3F_1_1101_10080_8031	1371	0	0	0	0	0	954	0	0	0	0	0	0	0	0	0	0	0	0	0	0	89	0	79	39	0	2	0	0	0	0	2	0	0	0	3	0	0	0	0	0	0	0	4	4	0	0	0
C. peruvianus 1 newEA1	OSD101_2014-06-21_0m_NPL022_HWI-M02024_112_000000000-ACJ3F_1_2113_24910_10755	28	0	0	1	0	0	0	0	0	0	0	0	0	0	0	0	0	0	0	0	0	0	0	0	0	0	0	0	0	0	0	0	0	0	0	0	5	0	0	0	0	0	0	0	0	0	0	0
C. peruvianus 2 Ch11B4	OSD101_2014-06-21_0m_NPL022_HWI-M02024_112_000000000-ACJ3F_1_1105_11552_18933	1	0	0	1	0	0	0	0	0	0	0	0	0	0	0	0	0	0	0	0	0	0	0	0	0	0	0	0	0	0	0	0	0	0	0	0	0	0	0	0	0	0	0	0	0	0	0	0
C. protuberans Bristol	OSD124_2014-06-21_5m_NPL022_HWI-M02024_112_000000000-ACJ3F_1_1108_17501_10221	27	0	0	0	0	0	0	0	0	0	0	0	0	0	0	0	0	0	0	4	0	0	0	0	0	0	0	0	0	0	0	0	0	0	0	0	0	0	0	0	0	4	0	0	0	0	0	13
C. pseudocurvisetus Na13C4	OSD107_2014-06-20_0m_NPL022_HWI-M02024_112_000000000-ACJ3F_1_1101_14909_22341	36	0	0	0	0	0	0	4	1	0	2	0	0	3	1	0	0	0	0	0	0	0	0	0	0	0	0	0	0	0	0	0	0	0	0	0	4	2	0	0	0	0	0	0	0	0	0	0
C. rostratus Na6B4	OSD115_2014-06-21_0m_NPL022_M01108_60_000000000-AD50T_1_1107_24221_10643	20	0	0	0	0	0	0	0	0	0	0	0	0	1	0	0	0	0	0	0	0	0	0	0	0	0	0	0	0	0	0	0	0	0	0	0	0	0	3	0	0	1	0	0	0	1	0	0
C. rotosporus Na18C1	OSD124_2014-06-21_5m_NPL022_HWI-M02024_112_000000000-ACJ3F_1_1104_10067_3280	8	0	0	0	0	0	0	0	0	0	0	0	0	0	0	0	0	0	0	3	0	0	0	0	0	0	0	0	0	0	0	0	0	0	0	0	0	0	0	0	0	0	0	0	0	0	0	0
C. seiracanthus EB3big	OSD124_2014-06-21_5m_NPL022_HWI-M02024_112_000000000-ACJ3F_1_1103_24665_6247	18	0	0	0	0	0	0	0	0	0	0	0	0	0	0	0	0	0	0	14	0	0	0	0	0	0	0	0	0	0	1	0	0	0	0	0	0	0	0	0	0	0	0	0	0	0	0	0
C. socialis KMMCC B734	OSD102_2014-06-21_0m_NPL022_HWI-M02024_112_000000000-ACJ3F_1_1104_27984_6725	1576	0	0	0	6	0	0	20	4	0	2	0	2	11	11	1	0	0	0	11	0	0	0	0	0	363	0	62	1	0	0	0	0	0	85	0	10	48	0	0	8	0	0	2	19	0	2	0
C. sp Clade CDP22 CDP22	OSD4_2014-06-20_0m_NPL022_M01108_60_000000000-AD50T_1_1102_14075_18959	10	0	0	0	0	0	0	0	0	0	0	0	0	0	0	0	0	0	0	0	0	0	0	0	0	0	0	0	0	0	0	0	0	0	0	0	0	0	0	0	0	0	0	0	0	0	0	0
C. sp Clade Na11C3 Na11C3	OSD131_2014-06-21_1m_NPL022_HWI-M02024_112_000000000-ACJ3F_1_1104_28984_13215	221	0	0	0	0	0	0	0	0	0	0	0	0	0	0	0	0	0	0	0	0	0	0	0	0	0	0	3	0	0	0	0	0	0	1	0	0	0	0	0	0	147	0	3	4	0	0	0
C. sp Clade Na12A3 Na12A3	OSD107_2014-06-20_0m_NPL022_HWI-M02024_112_000000000-ACJ3F_1_1105_23250_2805	53	0	0	0	0	0	0	4	0	0	2	0	1	0	23	0	0	0	0	0	3	0	0	0	0	0	0	0	0	0	0	0	0	0	0	0	0	0	0	0	5	0	0	0	0	4	0	2
C. sp Clade Na13C1 Na13C1	OSD176_2014-06-24_3m_NPL022_HWI-M02024_112_000000000-ACJ3F_1_1112_15234_10449	6	0	0	0	0	0	0	0	0	0	0	0	0	0	0	0	0	0	0	0	0	0	0	0	0	0	0	0	0	0	0	0	0	0	0	0	0	0	0	0	0	0	0	0	0	0	0	0
C. sp Clade Na17B2 Na17B2	OSD43_2014-06-21_0m_NPL022_HWI-M02024_112_000000000-ACJ3F_1_1107_21552_18809	1	0	0	0	0	0	0	0	0	0	0	0	0	0	0	0	0	0	0	0	0	0	0	0	0	0	0	0	0	0	0	0	0	0	0	0	0	0	0	0	0	0	0	0	0	0	0	0
C. sp Clade Na26B1 Na26B1	OSD43_2014-06-21_0m_NPL022_HWI-M02024_112_000000000-ACJ3F_1_1104_14821_13157	15	0	0	0	0	0	0	0	0	0	0	0	0	0	0	0	0	0	0	0	0	0	0	0	0	0	0	0	0	0	0	0	0	0	0	0	0	0	0	0	0	0	0	0	0	0	0	0
C. sp Clade Na28A1 Na26C1	OSD29_2014-06-21_0.2m_NPL022_HWI-M02024_112_000000000-ACJ3F_1_2109_29439_15233	8	0	0	0	0	0	0	0	0	0	0	0	0	0	0	0	0	0	0	0	0	0	0	0	0	0	0	0	0	0	0	0	0	0	0	0	0	0	0	0	0	0	0	0	0	0	0	0
C. sp Clade Va7D2 Va7D2	OSD100_2014-06-22_1m_NPL022_HWI-M02024_112_000000000-ACJ3F_1_1109_18394_15289	343	0	3	4	3	0	0	0	0	0	0	0	0	0	0	0	0	0	0	0	0	0	0	0	0	0	0	0	6	0	0	0	0	0	0	0	4	0	0	0	0	0	0	0	0	0	0	0
C. sporotruncatus Ch2A4	OSD107_2014-06-20_0m_NPL022_HWI-M02024_112_000000000-ACJ3F_1_1106_14324_3292	32	0	0	0	0	0	0	2	0	0	0	0	0	2	0	0	0	0	0	0	5	0	0	0	0	0	0	0	0	0	0	0	0	0	0	0	0	0	0	0	0	0	0	0	0	0	0	3
C. tenuissimus newCA3bis	OSD100_2014-06-22_1m_NPL022_HWI-M02024_112_000000000-ACJ3F_1_1102_24952_23494	21201	3	16	18	59	31	0	1	0	3	1044	480	22	49	509	101	506	17	102	185	0	0	0	0	0	0	0	2	262	5	43	0	21	1	5	0	381	7	91	0	87	205	0	11	3	80	118	25
C. teres Ch5A1	OSD71_2014-06-21_0m_NPL022_HWI-M02024_112_000000000-ACJ3F_1_1103_11738_14904	1	0	0	0	0	0	0	0	0	0	0	0	0	0	0	0	0	0	0	0	0	0	0	0	0	0	0	0	0	0	0	0	0	0	0	0	0	0	0	0	0	0	0	0	0	0	0	0
C. throndsenii Na44C3	OSD49_2014-06-21_2m_NPL022_HWI-M02024_112_000000000-ACJ3F_1_1107_11117_6464	1	0	0	0	0	0	0	0	0	0	0	0	0	0	0	0	0	0	0	0	0	0	0	0	0	0	0	0	0	0	0	0	0	0	0	0	0	0	0	0	0	0	0	0	0	0	0	0
C. tortissimus Na25B2	OSD14_2014-06-23_2m_NPL022_HWI-M02024_112_000000000-ACJ3F_1_2112_27678_13275	24	0	0	0	0	0	0	0	0	0	0	0	0	0	0	0	0	0	0	0	0	0	0	0	0	0	0	0	0	0	1	0	0	0	0	0	3	0	0	0	0	0	0	0	0	0	0	0
[truncated: 79 more columns]
