# Supplementary material for: Global distribution and diversity of Chaetoceros (Bacillariophyta, Mediophyceae): integration of classical and novel strategies
Source: PeerJ. 2019 Aug 19;7:e7410. doi: 10.7717/peerj.7410 (PMC6705385; doi:10.7717/peerj.7410)
Supplement: Table S5 — Accessed on 15 October 2018. [file peerj-07-7410-s005.xlsx]

## Sheet: Table S5
Table S5. List of taxonomically accepted Chaetoceros taxa according to AlgaeBase. Data refer to the access made on 15 October 2018.
Species	Synonym
Chaetoceros abnormis A.I.Proshkina-Lavrenko
Chaetoceros adelianus Manguin
Chaetoceros aequatorialis Cleve
Chaetoceros aequatorialis var. antarcticus Manguin
Chaetoceros affinis Lauder
Chaetoceros affinis var. circinalis (Meunier) Hustedt
Chaetoceros affinis subsp. ferox Takano
Chaetoceros anastomosans Grunow
Chaetoceros apendiculatus F.C.Müller Melchers
Chaetoceros astrabadicus A.Henckel
Chaetoceros atlanticus var. koreanus S.D.Lee & J.H.Lee
Chaetoceros atlanticus Cleve
Chaetoceros atlanticus var. neapolitanus (Schroeder) Hustedt
Chaetoceros aurivillii Cleve
Chaetoceros bacteriastroides Karsten
Chaetoceros bermejensis Hernández-Becerril
Chaetoceros borealis Bailey
Chaetoceros borealoides Honigmann
Chaetoceros borgei Lemmermann
Chaetoceros brevis F.Schütt
Chaetoceros brevisetus Aksentjev
Chaetoceros buceros Karsten
Chaetoceros bulbosus (Ehrenberg) Heiden
Chaetoceros calcitrans (Paulsen) H.Takano	C. simplex var. calcitrans Paulsen 1905
Chaetoceros caspicus Ostenfeld
Chaetoceros castracanei Karsten	C. impressus K.G.Jensen & Moestrup 1998
Chaetoceros ceratosporus Ostenfeld
Chaetoceros ceratosporus var. brachysetus Rines & Hargraves
Chaetoceros cinctus Gran
Chaetoceros clevei F.Schütt
Chaetoceros coarctatus Lauder
Chaetoceros coloradensis J.Li, Kociolek & Y.H.Gao
Chaetoceros compressus Lauder
Chaetoceros concavicornis L.A.Mangin	Chaetoceros borealis f. concavicornis (Mangin) Braaud 1935
Chaetoceros confertum F.C.Müller Melchers
Chaetoceros constrictus Gran
Chaetoceros constrictus var. ambiguus Proshkina-Lavrenko
Chaetoceros contortus F.Schütt
Chaetoceros contortus var. ornatus Chamnansinp, Moestrup & Lundholm
Chaetoceros convolutus Castracane
Chaetoceros convolutus f. trisetosus Brunel
Chaetoceros coronatus Gran
Chaetoceros costatus Pavillard
Chaetoceros crinitus F.Schütt
Chaetoceros criophilus Castracane
Chaetoceros curvatus Castracane
Chaetoceros curvisetus Cleve
Chaetoceros dadayi Pavillard
Chaetoceros danicus Cleve
Chaetoceros dayaensis Y.Li & S.Zhu
Chaetoceros debilis Cleve
Chaetoceros decipiens Cleve
Chaetoceros decipiens f. singularis Gran
Chaetoceros delicatulus Ostenfeld
Chaetoceros densus (Cleve) Cleve
Chaetoceros denticulatus H.S.Lauder
Chaetoceros denticulatus f. angustus Hustedt ex Simonsen
Chaetoceros diadema (Ehrenberg) Gran
Chaetoceros dichaeta Ehrenberg
Chaetoceros dichaeta var. tenuicornis (Mangin) Gogorev
Chaetoceros didymus Ehrenberg
Chaetoceros didymus var. anglicus (Grunow) Gran
Chaetoceros difficilis Cleve
Chaetoceros dipyrenops Meunier
Chaetoceros diversicurvatus Goor
Chaetoceros diversus Cleve
Chaetoceros eibenii Grunow
Chaetoceros elmorei Boyer
Chaetoceros exospermus Meunier
Chaetoceros externus Gran
Chaetoceros fallax Prosckina-Lavrenko
Chaetoceros femur F.Schütt
Chaetoceros femur var. parallelus Thorrington-Smith
Chaetoceros filiferus Karsten
Chaetoceros filiformis Meunier
Chaetoceros flexuosus Mangin
Chaetoceros fragilis Meunier
Chaetoceros furcellatus Yendo
Chaetoceros furcillatus Bailey
Chaetoceros galvestonensis A.Collier & A.Murphy
Chaetoceros gelidus Chamnansinp, Li, Lundholm & Moestrup
Chaetoceros gobii A.Henckel
Chaetoceros gracilis Pantocsek
Chaetoceros hendeyi Manguin
Chaetoceros hirtisetus (Rines & Hargreaves) Chamnansinp, Moestrup & Lundholm
Chaetoceros hirundinellus S.Qian
Chaetoceros hohnii Graebn.& Wujek
Chaetoceros holsaticus F.Schütt
Chaetoceros imbricatus Mangin
Chaetoceros indicus Karsten
Chaetoceros ingolfianus Ostenfeld
Chaetoceros intermedius A.Henckel
Chaetoceros jouseanus R. M. Gogorev
Chaetoceros juetlandicus J.Fenner
Chaetoceros karianus Grunow
Chaetoceros knipowitschii Henckel
Chaetoceros laciniosus F.Schütt
Chaetoceros laevis Leuduger-Fortmorel
Chaetoceros lauderi Ralfs ex Lauder
Chaetoceros lorenzianus Grunow
Chaetoceros messanensis Castracane
Chaetoceros minimus (Levander) D.Marino, G.Giuffre, M.Montresor & A.Zingone
Chaetoceros minutissimus Makarova & Proshkina-Lavrenko
Chaetoceros mitra (Bailey) Cleve
Chaetoceros muelleri Lemmermann
Chaetoceros muelleri var. subsalsus (Lemmermann) J.R.Johansen & Rushforth
Chaetoceros neglectus Karsten
Chaetoceros neocompactus VanLandingham
Chaetoceros neogracilis S.L.VanLandingham
Chaetoceros nipponicus J.Ikari
Chaetoceros odessanus Aksentjev
Chaetoceros orientalis Schiller
Chaetoceros pacificus J.Ikari
Chaetoceros paradoxus Cleve
Chaetoceros paulsenii f. robustus A.Henckel
Chaetoceros paulsenii Ostenfeld
Chaetoceros pavillardii J.Ikari
Chaetoceros pelagicus Cleve
Chaetoceros pendulus Karsten
Chaetoceros perpusillus Cleve
Chaetoceros peruvianus Brightwell
Chaetoceros peruvianus f. depressus A.K.M.N.Islam & A.Aziz
Chaetoceros phuketensis J.E.B.Rines, P.Boonruang & E.C.Theriot
Chaetoceros pinguis A.Henckel
Chaetoceros pinguis f. tenuis A.Henckel
Chaetoceros procerus F.Schütt
Chaetoceros proschkinae Gogorev
Chaetoceros protuberans Lauder
Chaetoceros pseudoaurivillii J.Ikari
Chaetoceros pseudobrevis Pavillard
Chaetoceros pseudocrinitus Ostenfeld
Chaetoceros pseudocurvisetus Mangin
Chaetoceros pseudodichaetus J.Ikari
Chaetoceros radicans F.Schütt
Chaetoceros rectus Hernández-Becerril
Chaetoceros recurvatus Henckel
Chaetoceros recurvatus f. robustus A.Henckel
Chaetoceros rigidus Ostenfeld
Chaetoceros rostratus var. glandazii (Mangin) F.J.R.Taylor
Chaetoceros rostratus Ralfs
Chaetoceros rotosporus Li, Lundholm & Moestrup
Chaetoceros salsugineus Takano
Chaetoceros salsugineus f. solitarius Takano
Chaetoceros salsugineus f. curtus Takano
Chaetoceros saltans Cleve
Chaetoceros schuettii Cleve
Chaetoceros secundus Cleve
Chaetoceros seiracanthus Gran
Chaetoceros sessilis Grøntved
Chaetoceros setoensis J.Ikari
Chaetoceros seychellarum Karsten
Chaetoceros seychellarum var. australis Manguin
Chaetoceros siamensis Ostenfeld
Chaetoceros similis Cleve
Chaetoceros simplex Ostenfeld
Chaetoceros socialis H.S.Lauder
Chaetoceros socialis var. autumnalis Prosckina-Lavrenko
Chaetoceros subsecundus (Grunow ex Van Heurck) Hustedt
Chaetoceros subtilis Cleve
Chaetoceros sumatranus Karsten
Chaetoceros tenuissimus Meunier
Chaetoceros teres Cleve
Chaetoceros tetrachaeta Ehrenberg C - type
Chaetoceros tetrastichon Cleve
Chaetoceros throndsenii (Marino, Montresor, & Zingone) Marino, Montresor & Zingone
Chaetoceros throndsenii var. trisetosus Zingone
Chaetoceros tortissimus Gran
Chaetoceros vanheurckii Gran
Chaetoceros vistulae Apstein
Chaetoceros vixvisibilis Schiller
Chaetoceros wighamii Brightwell
Chaetoceros willei Gran
Chaetoceros xishaensis Y.C.Kuo, J.Ye & H.Zhou
