# Supplementary material for: Global distribution and diversity of Chaetoceros (Bacillariophyta, Mediophyceae): integration of classical and novel strategies
Source: PeerJ. 2019 Aug 19;7:e7410. doi: 10.7717/peerj.7410 (PMC6705385; doi:10.7717/peerj.7410)
Supplement: Table S6 — ”GBIF datasets” and ”OBIS datasets” include the names of the datasets in GBIF and OBIS respectively, in which Chaetoceros occurence data where gathered. ”unique datasets” includes the list of unique datasets among the two sources, whilst ”shared datasets” lists the datasets included in both platforms. [file peerj-07-7410-s006.xlsx]

## Sheet: GBIF datasets
Table S6. List of datasets included in GBIF and OBIS platforms. The sheets "GBIF datasets" and "OBIS datasets" include the names of the datasets in GBIF and OBIS respectively, in which Chaetoceros occurence data where gathered. The sheet "unique datasets" include the list of unique datasets among the two sources, whilst in the sheet "shared datasets" are listed the datasets included in both platf…
(Table 1) Abundance of unicellular eukaryotes in ice cores collected during the July 2008 CCGS Amundsen cruise in Darnley Bay
(Table 1) Maximal abundance of dominating species and phytoplankton groups within the Gelendzhik polygon in 2002-2005
(Table 2) Occurrences of diatoms species in DSDP Hole 41-366
(Table 2) Species composition of algae and cyanobacteria encountered in plankton of the Large Aral Sea on June 2-8, 2008
(Table 3) Abundance and biomass of Proboscia alata in patches of its mass development over the Bering Sea middle shelf, percentages of P. alata and associated algae species and their groups in total phytoplankton abundance and biomass
(Table 3) Occurrences of diatoms species in DSDP Hole 41-369A
(Table 3) Protist occurrence in bottom sea ice and surface water samples obtained during a CCGS Amundsen cruise in 2007/2008
(Table 4) Abundance of microalgae in sinking sedimentary material from sediment traps in the northeast Black Sea in September-October 1999
(Table 4a) Abundance of microalgae in surface layer bottom sediments at Station ST-RSh-1 in the northeast Black Sea
(Table T1) Neogene stratigraphy of diatoms, ebridians and endoskeletal dinoflagellates in ODP Hole 183-1138A
Abundance and biomass of phytoplankton in Butakova Bay, Aral Sea, in september 1990
Abundance and biomass of phytoplankton in the Aral Sea
Abundance of algae in the Aral Sea
Abundance of broken diatom frustules measured on water bottle samples at station PS58/009-2
Abundance of broken diatom frustules measured on water bottle samples at station PS58/011-3
Abundance of broken diatom frustules measured on water bottle samples at station PS58/012-5
Abundance of broken diatom frustules measured on water bottle samples at station PS58/014-4
Abundance of broken diatom frustules measured on water bottle samples at station PS58/038-3
Abundance of broken diatom frustules measured on water bottle samples at station PS58/041-2
Abundance of broken diatom frustules measured on water bottle samples at station PS58/042-2
Abundance of broken diatom frustules measured on water bottle samples at station PS58/043-2
Abundance of broken diatom frustules measured on water bottle samples at station PS58/045-2
Abundance of broken diatom frustules measured on water bottle samples at station PS58/046-3
Abundance of broken diatom frustules measured on water bottle samples at station PS58/048-3
Abundance of broken diatom frustules measured on water bottle samples at station PS58/049-3
Abundance of broken diatom frustules measured on water bottle samples at station PS58/061-3
Abundance of broken diatom frustules measured on water bottle samples at station PS58/088-4
Abundance of broken diatom frustules measured on water bottle samples at station PS58/090-4
Abundance of broken diatom frustules measured on water bottle samples at station PS58/091-4
Abundance of broken diatom frustules measured on water bottle samples at station PS58/092-3
Abundance of broken diatom frustules measured on water bottle samples at station PS58/107-5
Abundance of broken diatom frustules measured on water bottle samples at station PS58/108-1
Abundance of empty diatom frustules measured on water bottle samples at station PS58/009-2
Abundance of empty diatom frustules measured on water bottle samples at station PS58/011-3
Abundance of empty diatom frustules measured on water bottle samples at station PS58/012-5
Abundance of empty diatom frustules measured on water bottle samples at station PS58/014-4
Abundance of empty diatom frustules measured on water bottle samples at station PS58/038-3
Abundance of empty diatom frustules measured on water bottle samples at station PS58/041-2
Abundance of empty diatom frustules measured on water bottle samples at station PS58/042-2
Abundance of empty diatom frustules measured on water bottle samples at station PS58/043-2
Abundance of empty diatom frustules measured on water bottle samples at station PS58/045-2
Abundance of empty diatom frustules measured on water bottle samples at station PS58/046-3
Abundance of empty diatom frustules measured on water bottle samples at station PS58/048-3
Abundance of empty diatom frustules measured on water bottle samples at station PS58/049-3
Abundance of empty diatom frustules measured on water bottle samples at station PS58/061-3
Abundance of empty diatom frustules measured on water bottle samples at station PS58/088-4
Abundance of empty diatom frustules measured on water bottle samples at station PS58/090-4
Abundance of empty diatom frustules measured on water bottle samples at station PS58/091-4
Abundance of empty diatom frustules measured on water bottle samples at station PS58/092-3
Abundance of empty diatom frustules measured on water bottle samples at station PS58/107-5
Abundance of empty diatom frustules measured on water bottle samples at station PS58/108-1
Abundance of microplanton determined from water bottle samples during AEGAEO cruise LIA-8
Abundance of phytoplankton in surface water during THALASSA campaign PROSOPE
Algaterra Types
Antarctic Marine Protists species checklist
Anymals+plants - Citizen Science Data
Arctic Ocean Diversity
Artenvielfalt der Nordsee - Bremerhaven (Dorum-Neufeld)
Artenvielfalt der Nordsee - Helgoland
Artenvielfalt der Nordsee - Sylt
Artportalen (Swedish Species Observation System)
Banco de Datos de la Biodiversidad de la Comunitat Valenciana
Bay of Fundy Species List
Benthic Microalgae Chukchi Sea, 1972
Biodiversidad de productores primarios de las lagunas costeras del norte de Yucatán
Biodiversidad del microfitoplancton marino en la zona económica exclusiva limítrofe del Pacífico central mexicano
Biodiversidad fitoplanctónica de cenotes: Patrones espaciales y temporales
Biological observations from the Discovery Investigations 1925-1952
Biota occurrence data from plankton surveys around New Zealand
Botanical Museum, Copenhagen. Database of type specimens
Botany (UPS)
cariaco-phytoplankton, http://www.pnas.org/cgi/doi/10.1073/pnas.1207514109
CIM Specimens
Comportamiento espacio-temporal de la densidad fitoplanctónica en el año 2015 Magdalena, Colombia, http://doi.org/10.15472/fzgoop
Composición y distribución espacial del fitoplancton en aguas oceánicas del Caribe sur colombiano, http://doi.org/10.15472/lz7nnc
Concentration of siliceous microplankton in surface sediments, brine
Concentration of siliceous microplankton in surface sediments, size fraction > 40 µm
Concentration of siliceous microplankton in surface sediments, size fraction 20-40 µm
Content of different diatom species in sediment core GIK23259-2
Continuous Plankton Recorder Dataset (SAHFOS)
CSIRO, Australian National Algae Culture Collection, Global, 1949-2008, CSIRO:ANACC_1949_2008
Culture Collection of Algae
Diatom abundance measured on water bottle samples at station PS58/009-2
Diatom abundance measured on water bottle samples at station PS58/011-3
Diatom abundance measured on water bottle samples at station PS58/012-5
Diatom abundance measured on water bottle samples at station PS58/014-4
Diatom abundance measured on water bottle samples at station PS58/038-3
Diatom abundance measured on water bottle samples at station PS58/041-2
Diatom abundance measured on water bottle samples at station PS58/042-2
Diatom abundance measured on water bottle samples at station PS58/043-2
Diatom abundance measured on water bottle samples at station PS58/045-2
Diatom abundance measured on water bottle samples at station PS58/046-3
Diatom abundance measured on water bottle samples at station PS58/048-3
Diatom abundance measured on water bottle samples at station PS58/049-3
Diatom abundance measured on water bottle samples at station PS58/061-3
Diatom abundance measured on water bottle samples at station PS58/088-4
Diatom abundance measured on water bottle samples at station PS58/090-4
Diatom abundance measured on water bottle samples at station PS58/091-4
Diatom abundance measured on water bottle samples at station PS58/092-3
Diatom abundance measured on water bottle samples at station PS58/107-5
Diatom abundance measured on water bottle samples at station PS58/108-1
Diatom assamblage in samples from sediment trap NB6
Diatom assamblage in samples from sediment trap OG3
Diatom assamblage in samples from sediment trap OG4
Diatom assamblage in samples from sediment trap OG5
Diatomeas (Bacillariophyceae) y dinoflageladas (Dinophyceae) frecuentes en el Pacífico mexicano (costa oeste de Baja California, Pacífico centro y sur)
Diatomeas (Bacillariophyceae) y dinoflageladas (Dinophyceae) planctónicas más frecuentes en el Golfo de California
Diatomeas (Bacillariophyceae) y Dinoflageladas (Dinophyceae) planctónicas más frecuentes en la región sur del Golfo de México
Diatoms from SAZ Sediment traps
Diatoms from the Vestfold Hills Lakes
Diet, Tidal and Vertical Variations of Phytoplankton and Its Environment in Frobisher Bay, Canada, 1980 and 1981
Distribution of surface phytoplankton between New Zealand and Antarctica, December 1957, Southwestern Pacific OBIS (2014)
Diversidad y dinámica del fitoplancton marino en la bahía de Acapulco, Guerrero
Dutch Foundation for Applied Water Research (STOWA) - Limnodata Neerlandica
Electron Micrograph Database - Marine Specimens
Electron Micrograph Database - Terrestrial and Limnetic Specimens
Estimated plankton abundance at station PS63/064-6
Fitoplancton marino frente a Baja California. 1. Bahía de Todos Santos, BC
Fitoplancton marino frente a Baja California. 2. Áreas de surgencias de la región Ensenadense
flora & fauna(NIBR)
Geographically tagged INSDC sequences
Gesamtartenliste Bremerhaven, Helgoland und Sylt
Global Lacustrine Diatoms
HAS-Algae - Coleção Ficológica do HAS, http://splink.cria.org.br/manager/detail?resource=HAS-Algae
Herbarium of Umeå University (UME)
Icota - Pelagant
IMOS - AusCPR: Phytoplankton Abundance, http://dx.doi.org/10.1016/j.pocean.2005.09.011
IMOS National Reference Stations (NRS) Phytoplankton Abundance and Biovolume
iNaturalist Research-grade Observations
IndOBIS, Indian Ocean Node of OBIS
International Polar Year and Census of Antarctic Marine Life Ross Sea voyage (TAN0802) biodiversity data
Ireland's BioBlitz
Lund Botanical Museum (LD)
Merseyside BioBank (unverified)
Microbial Culture Collection, National Institute for Environmental Studies
MICROBIS database
Microfossil abundance of Hole 16-157
Microfossil abundance of Hole 16-157A
Microfossil abundance of Hole 16-158
Microplankton abundance at Station MARCH-1997-GN36199704601MSB01 in the euphotic zone of the Aegean Sea in spring 1997. Part 1 - diatoms
Microplankton abundance at Station MARCH-1997-GN36199704601MSB02 in the euphotic zone of the Aegean Sea in spring 1997. Part 1 - diatoms
Microplankton abundance at Station MARCH-1997-GN36199704601MSB06 in the euphotic zone of the Aegean Sea in spring 1997. Part 1 - diatoms
Microplankton abundance at Station MARCH-1997-GN36199704601MSB07 in the euphotic zone of the Aegean Sea in spring 1997. Part 1 - diatoms
Microplankton abundance at Station MARCH-1997-GN36199704603MNB03 in the euphotic zone of the Aegean Sea in spring 1997. Part 1 - diatoms
Microplankton abundance at Station MARCH-1997-GN36199704603MNB04 in the euphotic zone of the Aegean Sea in spring 1997. Part 1 - diatoms
Microplankton abundance at Station MARCH-1998-GN36199804610MSB01 in the euphotic zone of the Aegean Sea in March 1998. Part 1 - diatoms
Microplankton abundance at Station MARCH-1998-GN36199804610MSB03 in the euphotic zone of the Aegean Sea in March 1998. Part 1 - diatoms
Microplankton abundance at Station MARCH-1998-GN36199804611MNB01 in the euphotic zone of the Aegean Sea in March 1998. Part 1 - diatoms
Microplankton abundance at Station MARCH-1998-GN36199804611MNB02 in the euphotic zone of the Aegean Sea in March 1998. Part 1 - diatoms
Microplankton abundance at Station MARCH-1998-GN36199804611MNB03 in the euphotic zone of the Aegean Sea in March 1998. Part 1 - diatoms
Microplankton abundance in the euphotic zone of the Aegean and Levantine Seas in August-September 1989
Microplankton abundance in the euphotic zone of the Aegean and Levantine Seas in February 1989
Microplankton abundance in the euphotic zone of the Aegean and Levantine Seas in September-October 1987
Microplankton abundance in the euphotic zone of the Aegean Sea at Station JUNE-94-GN3619940280200260
Microplankton abundance in the euphotic zone of the Aegean Sea at Station JUNE-94-GN3619940280200320
Microplankton abundance in the euphotic zone of the Aegean Sea at Station JUNE-94-GN3619940280200500
Microplankton abundance in the euphotic zone of the Aegean Sea at Station JUNE-94-GN3619940280200590
Microplankton abundance in the euphotic zone of the Aegean Sea at Station JUNE-94-GN3619940280200800
Microplankton abundance in the euphotic zone of the Aegean Sea at Station MARCH-94-GN3619940280100260
Microplankton abundance in the euphotic zone of the Aegean Sea at Station MARCH-94-GN3619940280100320
Microplankton abundance in the euphotic zone of the Aegean Sea at Station MARCH-94-GN3619940280100500
Microplankton abundance in the euphotic zone of the Aegean Sea at Station MARCH-94-GN3619940280100590
Microplankton abundance in the euphotic zone of the Aegean Sea at Station MARCH-94-GN3619940280100800
Microplankton abundance in the euphotic zone of the Aegean Sea in October-November 1991
Microplankton abundance in the euphotic zone of the Aegean Sea in September 1994
Microplankton abundance in the euphotic zone of the Aegean Sea in winter 1995
Microplankton abundance in the euphotic zone of the Aegean, Levantine and Ionian Seas in March-April 1987
Microplankton abundance in the euphotic zone of the Aegean, Levantine and Ionian Seas in March-April 1992
Microplankton abundance in the euphotic zone of the Ionian Sea in October-November 1991
Microplankton abundance in the euphotic zone of the Levantine Sea in October-November 1991
Microplankton abundance in the euphotic zone of the South Aegean, Levantine and Ionian Seas in March-April 1986
Microplankton abundance measured on water bottle samples during AEGAEO cruise LIA-7
Natural History Museum (London) Collection Specimens, http://dx.doi.org/10.5519/0002965
Naturalis Biodiversity Center (NL) - Botany
Neptune Deep-Sea Microfossil Occurrence Database
NMNH Extant Specimen Records
Norwegian Biodiversity Information Centre - Other datasets
Paleobiology Database
Palynological analysis of sediment core GeoB3910-2
Patrones de variación espacial y temporal de la biodiversidad fitoplanctónica de los cenotes abiertos de Yucatán
Phytoplankton abundance along the track of Akademik Vernadsky cruise AV5
Phytoplankton abundance and biomass measured on water bottle samples during POLARSTERN cruise ANT-X/6
Phytoplankton abundance and species composition in the Gulf of Naples and the Gulf Salerno in November 1985
Phytoplankton abundance and species composition in the Gulf of Naples from February to December 1987
Phytoplankton abundance and species composition in the Gulf of Naples in June 1999 at station MCSSII-phyto102-110
Phytoplankton abundance and species composition in the Gulf of Naples in June 1999 at station MCSSII-phyto111-119
Phytoplankton abundance and species composition in the Gulf of Naples in June 1999 at station MCSSII-phyto120-128
Phytoplankton abundance and species composition in the Gulf of Naples in June 1999 at station MCSSII-phyto129-136
Phytoplankton abundance and species composition in the Gulf of Naples in June 1999 at station MCSSII-phyto66-74
Phytoplankton abundance and species composition in the Gulf of Naples in June 1999 at station MCSSII-phyto75-83
Phytoplankton abundance and species composition in the Gulf of Naples in June 1999 at station MCSSII-phyto84-92
Phytoplankton abundance and species composition in the Gulf of Naples in March 1999 at Station MCSSI-phyto1-10
Phytoplankton abundance and species composition in the Gulf of Naples in March 1999 at Station MCSSI-phyto11-19
Phytoplankton abundance and species composition in the Gulf of Naples in March 1999 at Station MCSSI-phyto20-28
Phytoplankton abundance and species composition in the Gulf of Naples in March 1999 at Station MCSSI-phyto29-38
Phytoplankton abundance and species composition in the Gulf of Naples in March 1999 at Station MCSSI-phyto39-47
Phytoplankton abundance and species composition in the Gulf of Naples in March 1999 at Station MCSSI-phyto48-56
Phytoplankton abundance and species composition in the Gulf of Naples in March 1999 at Station MCSSI-phyto57-65
Phytoplankton abundance and species composition in the North Balearic Sea in March 2003
Phytoplankton abundance and species composition in the Sicily Channel in October 1991
Phytoplankton abundance and species composition in the Tyrrhenian Sea in November 1981
Phytoplankton abundance at bottle station A1/52
Phytoplankton abundance at bottle station A3/66A
Phytoplankton abundance at bottle station A8/2
Phytoplankton abundance at bottle station A9/5
Phytoplankton abundance at bottle station GOM1/6
Phytoplankton abundance at bottle station GOM2/7
Phytoplankton abundance at bottle station GOM3/1
Phytoplankton abundance at bottle station GOM4/1
Phytoplankton abundance at bottle station GOM5/4
Phytoplankton abundance at bottle station GOM6/1
Phytoplankton abundance at several bottle stations in may 1996, Pisco, Peru
Phytoplankton abundance at several bottle stations in May 1996, Sechura, Peru
Phytoplankton abundance at several stations in December 2004, Chipana, Chile
Phytoplankton abundance at several stations in January 2005, Chipana, Chile
Phytoplankton abundance at station Casma_2003-02-15_2, Casma, Peru
Phytoplankton abundance at station Casma_2003-02-27_1, Casma, Peru
Phytoplankton abundance at station Casma_2003-02-27_2, Casma, Peru
Phytoplankton abundance at station Casma_2003-03-13_1, Casma, Peru
Phytoplankton abundance at station Casma_2003-03-13_2, Casma, Peru
Phytoplankton abundance at station Casma_2003-03-27_1, Casma, Peru
Phytoplankton abundance at station Casma_2003-03-27_2, Casma, Peru
Phytoplankton abundance at station Casma_2003-04-14_1, Casma, Peru
Phytoplankton abundance at station Casma_2003-04-14_2, Casma, Peru
Phytoplankton abundance at station Casma_2003-04-28_1, Casma, Peru
Phytoplankton abundance at station Casma_2003-04-28_2, Casma, Peru
Phytoplankton abundance at station Casma_2003-06-04_1, Casma, Peru
Phytoplankton abundance at station Casma_2003-06-04_2, Casma, Peru
Phytoplankton abundance at station Casma_2003-06-24_1, Casma, Peru
Phytoplankton abundance at station Casma_2003-06-24_2, Casma, Peru
Phytoplankton abundance at station CD46_0105C#2
Phytoplankton abundance at station CD46_0405C#7
Phytoplankton abundance at station CD46_0705C#4
Phytoplankton abundance at station CD46_1005C#4
Phytoplankton abundance at station CD46_1305C#2
Phytoplankton abundance at station CD46_2005C#4
Phytoplankton abundance at station CD47_0306C#7
Phytoplankton abundance at station CD47_0606C#7
Phytoplankton abundance at station CD47_0906C#6
Phytoplankton abundance at station CD47_1206C#7
Phytoplankton abundance at station CD47_2805C#5
Phytoplankton abundance at station CD47_3105C#4
Phytoplankton abundance at station DI182_11860#6
Phytoplankton abundance at station DI182_11862#3
Phytoplankton abundance at station DI182_11863#1
Phytoplankton abundance at station DI182_11864#61
Phytoplankton abundance at station Rigel_1_2005-02 in Febraury 2005, Chipana, Chile
Phytoplankton abundance at station Rigel_1_2005-03 in March 2005, Chipana, Chile
Phytoplankton abundance at station Rigel_1_2005-05 in May 2005, Chipana, Chile
Phytoplankton abundance at station Rigel_1_2005-07 in July 2005, Chipana, Chile
Phytoplankton abundance at station Rigel_2_2005-02 in Febraury 2005, Chipana, Chile
Phytoplankton abundance at station Rigel_2_2005-04 in April 2005, Chipana, Chile
Phytoplankton abundance at station Rigel_2_2005-05 in May 2005, Chipana, Chile
Phytoplankton abundance at station Rigel_2_2005-07 in July 2005, Chipana, Chile
Phytoplankton abundance at station Rigel_2_2005-08 in August 2005, Chipana, Chile
Phytoplankton abundance at station Rigel_3_2005-02 in Febraury 2005, Chipana, Chile
Phytoplankton abundance at station Rigel_3_2005-05 in May 2005, Chipana, Chile
Phytoplankton abundance at station Rigel_3_2005-07 in July 2005, Chipana, Chile
Phytoplankton abundance at station Rigel_3_2005-08 in August 2005, Chipana, Chile
Phytoplankton abundance at station Rigel_4_2005-07 in July 2005, Chipana, Chile
Phytoplankton abundance at station Rigel_4_2005-08 in August 2005, Chipana, Chile
Phytoplankton abundance at station Rigel_5_2005-02 in Febraury 2005, Chipana, Chile
Phytoplankton abundance at station Rigel_5_2005-07 in July 2005, Chipana, Chile
Phytoplankton abundance at station Rigel_5_2005-08 in August 2005, Chipana, Chile
Phytoplankton abundance at station Rigel_6_2005-07 in July 2005, Chipana, Chile
Phytoplankton abundance at station Rigel_6_2005-08 in August 2005, Chipana, Chile
Phytoplankton abundance at station Sechin_2003-07-15_1, Casma, Peru
Phytoplankton abundance at station Sechin_2003-07-15_2, Casma, Peru
Phytoplankton abundance at station Sechin_2003-08-06_1, Casma, Peru
Phytoplankton abundance at station Sechin_2003-08-06_2, Casma, Peru
Phytoplankton abundance at station Sechin_2003-08-27_1, Casma, Peru
Phytoplankton abundance at station Sechin_2003-08-27_2, Casma, Peru
Phytoplankton abundance at station Sechin_2003-09-18_1, Casma, Peru
Phytoplankton abundance at station Sechin_2003-09-18_2, Casma, Peru
Phytoplankton abundance at station Sechin_2003-10-03_1, Casma, Peru
Phytoplankton abundance at station Sechin_2003-10-03_2, Casma, Peru
Phytoplankton abundance at station Sechin_2003-10-22_1, Casma, Peru
Phytoplankton abundance at station Sechin_2003-10-22_2, Casma, Peru
Phytoplankton abundance at station Sechin_2003-11-06_1, Casma, Peru
Phytoplankton abundance at station Sechin_2003-11-06_2, Casma, Peru
Phytoplankton abundance at station Sechin_2003-11-25_1, Casma, Peru
Phytoplankton abundance at station Sechin_2003-11-25_2, Casma, Peru
Phytoplankton abundance at station Sechin_2003-12-03_1, Casma, Peru
Phytoplankton abundance at station Sechin_2003-12-10_1, Casma, Peru
Phytoplankton abundance at station Sechin_2003-12-10_2, Casma, Peru
Phytoplankton abundance at station Sechin_2003-12-17_1, Casma, Peru
Phytoplankton abundance at station Sechin_2003-12-17_2, Casma, Peru
Phytoplankton abundance at station Sechin_2003-12-28_1, Casma, Peru
Phytoplankton abundance at station Sechin_2003-12-28_2, Casma, Peru
Phytoplankton abundance at station Sechin_EP1 in 2002, Casma, Peru
Phytoplankton abundance at Station Sechin_EP2 in 2002, Casma, Peru
Phytoplankton abundance at stations off Paita in August 1995, Piura, Peru
Phytoplankton abundance at stations off Punta Falsa in August 1995, Piura, Peru
Phytoplankton abundance at the sea bottom off Sechura in january 2007, Peru
Phytoplankton abundance during Akademik Vernadsky cruise AV22
Phytoplankton abundance during Akademik Vernadsky cruise AV5
Phytoplankton abundance during Alexander von Humboldt cruise AvH90/4
Phytoplankton abundance during ARGOS cruise Argos90/8
Phytoplankton abundance during ARGOS cruise Argos91/5
Phytoplankton abundance during Arne Tiselius cruise AT91/2
Phytoplankton abundance during Arnold Veimer cruise AV90/2
Phytoplankton abundance during G. M. Dannevig cruise GMD90/12
Phytoplankton abundance during G. M. Dannevig cruise GMD90/18
Phytoplankton abundance during G. M. Dannevig cruise GMD91/10
Phytoplankton abundance during Gunnar Thorson cruise GT90/5
Phytoplankton abundance during Lev Titov cruise LT90/2
Phytoplankton abundance during Lev Titov cruise LT90/5
Phytoplankton abundance during Lev Titov cruise LT91
Phytoplankton abundance during Mikhail Lomonosov cruise ML47
Phytoplankton abundance during OCEANIA cruise Oceania90
Phytoplankton abundance during Professor Siedlecki cruise PSied90/1
Phytoplankton abundance during Professor Vodyanitskiy cruise PV13
Phytoplankton abundance during Professor Vodyanitskiy cruise PV23
Phytoplankton abundance during Professor Vodyanitskiy cruise PV30_1
Phytoplankton abundance during Professor Vodyanitskiy cruise PV4
Phytoplankton abundance during Professor Vodyanitskiy cruise PV5
Phytoplankton abundance during Professor Vodyanitskiy cruise PV8
Phytoplankton abundance during Trygve Braarud cruise TB90
Phytoplankton abundance duringG. O. Sars cruise GS90/6
Phytoplankton abundance in surface water during Akademik Vernadsky cruise AV22
Phytoplankton abundance in surface water during Akademik Vernadsky cruise AV24
Phytoplankton abundance in surface water during cruise Alkor 237-1
Phytoplankton abundance in surface water during cruise CD60
Phytoplankton abundance in surface water during cruise CD61
Phytoplankton abundance in surface water during Professor Vodyanitskiy cruise PV30_1
Phytoplankton abundance in surface water in August 1997, Pisco, Peru
Phytoplankton abundance in surface water in February 1998, Chimbote, Peru
Phytoplankton abundance in surface water in February 1998, Ilo, Peru
Phytoplankton abundance in surface water in February 1998, Paita, Peru
Phytoplankton abundance in surface water in February 1998, Pisco, Peru
Phytoplankton abundance in surface water in January 1996, Callao, Peru
Phytoplankton abundance in surface water in January 1996, Chimbote, Peru
Phytoplankton abundance in surface water in January 1996, Ilo, Peru
Phytoplankton abundance in surface water in January 1996, Paita, Peru
Phytoplankton abundance in surface water in January 1996, Pisco, Peru
Phytoplankton abundance in surface water in January 2007, Sechura Bay, Peru
Phytoplankton abundance in surface water in July-August 1996, Callao, Peru
Phytoplankton abundance in surface water in July-August 1996, Chimbote, Peru
Phytoplankton abundance in surface water in July-August 1996, Ilo, Peru
Phytoplankton abundance in surface water in July-August 1996, Paita, Peru
Phytoplankton abundance in surface water in July-August 1996, Pisco, Peru
Phytoplankton abundance in surface water in June 1997, Callao, Peru
Phytoplankton abundance in surface water in June 1997, Chimbote, Peru
Phytoplankton abundance in surface water in June 1997, Ilo, Peru
Phytoplankton abundance in surface water in June 1997, Paita, Peru
Phytoplankton abundance in surface water in June 1997, Pisco, Peru
Phytoplankton abundance in surface water in March 1997, Ilo, Peru
Phytoplankton abundance in surface water in March 1997, Pisco, Peru
Phytoplankton abundance in surface water in May 1996, Chimbote, Peru
Phytoplankton abundance in surface water in May 1996, Ilo, Peru
Phytoplankton abundance in surface water in May 1996, Pisco, Peru
Phytoplankton abundance in surface water in May 1997, Callao, Peru
Phytoplankton abundance in surface water in November 1997, Chimbote, Peru
Phytoplankton abundance in surface water in November 1997, Ilo, Peru
Phytoplankton abundance in surface water in November 1997, Paita, Peru
Phytoplankton abundance in surface water in November 1997, Pisco, Peru
Phytoplankton abundance in surface water in October 1995, Chimbote, Peru
Phytoplankton abundance in surface water in October 1995, Ilo, Peru
Phytoplankton abundance in surface water in October 1996, Callao, Peru
Phytoplankton abundance in surface water in October 1996, Chimbote, Peru
Phytoplankton abundance in surface water in October 1996, Ilo, Peru
Phytoplankton abundance in surface water in October 1996, Paita, Peru
Phytoplankton abundance in surface water in October 1996, Pisco, Peru
Phytoplankton abundance in surface water in October 1997, Callao, Peru
Phytoplankton abundance in surface water in October 1997, Chimbote, Peru
Phytoplankton abundance in surface water in October 1997, Ilo Peru
Phytoplankton abundance in surface water in October 1997, Paita, Peru
Phytoplankton abundance in surface water in October 1997, Pisco, Peru
Phytoplankton abundance in surface water in September 1996, Callao, Peru
Phytoplankton abundance in surface water in September 1996, Chimbote, Peru
Phytoplankton abundance in surface water in September 1996, Ilo, Peru
Phytoplankton abundance in surface water in September 1996, Paita, Peru
Phytoplankton abundance in surface water in September 1996, Pisco, Peru
Phytoplankton abundance in surface water in September 1997, Chimbote, Peru
Phytoplankton abundance in surface water in September 1997, Ilo, Peru
Phytoplankton abundance in surface water in September 1997, Pisco, Peru
Phytoplankton abundance measured in surface water during Charles Darwin cruise CD85
Phytoplankton abundance measured in surface water during DISCOVERY cruise D217
Phytoplankton abundance measured on water bottle samples at station PS65/424-3
Phytoplankton abundance measured on water bottle samples at station PS65/427-1
Phytoplankton abundance measured on water bottle samples at station PS65/466-2
Phytoplankton abundance measured on water bottle samples at station PS65/470-1
Phytoplankton abundance measured on water bottle samples at station PS65/508-2
Phytoplankton abundance measured on water bottle samples at station PS65/514-2
Phytoplankton abundance measured on water bottle samples at station PS65/522-1
Phytoplankton abundance measured on water bottle samples at station PS65/545-1
Phytoplankton abundance measured on water bottle samples at station PS65/546-2
Phytoplankton abundance measured on water bottle samples at station PS65/553-3
Phytoplankton abundance measured on water bottle samples at station PS65/570-4
Phytoplankton abundance measured on water bottle samples at station PS65/580-2
Phytoplankton abundance measured on water bottle samples at station PS65/587-1
Phytoplankton abundance measured on water bottle samples at station PS65/593-3
Phytoplankton abundance measured on water samples from rivers of the Lena Delta in 2009
Phytoplankton abundance off Chao island in Juli 2003, Peru
Phytoplankton abundance off Guañape bay in Juli 2003, Peru
Phytoplankton abundance off Guañape islands in Juli 2003, Peru
Phytoplankton data collected from a diurnal station in Sevastopol Bay (Black Sea) during 1952, https://doi.org/10.14284/59
Phytoplankton from the White Sea, Barents Sea, Norwegian Sea and Arctic Basin 1993-2003
Phytoplankton long-term time-series at the fixed coastal station in the Gulf of Naples, data for the years 1984-1991. Part 1
Phytoplankton long-term time-series at the fixed coastal station in the Gulf of Naples, data for the years 1995-1999. Part 1
Phytoplankton long-term time-series at the fixed coastal station in the Gulf of Naples, data for the years 2000-2004. Part 1
Phytoplankton long-term time-series at the fixed coastal station in the Gulf of Naples, data for the years 2005-2006. Part 1
Phytoplankton measured on water bottle samples during THALASSA cruise PROSOPE
Phytoplankton samples - 2005/06 V3 BROKE-West
Phytoplankton samples - 2006/07 V3 SAZ-Sense
Phytoplankton Species Composition, Abundance and Cell Size in San Francisco Bay: Microscopic Analyses of USGS Samples Collected 1992-2014, https://doi.org/10.5066/F74F1P6P
Planktic foraminifera in surface sediments
Plankton abundance measured in surface water during Polarstern cruise ANT-XX/2
PlutoF platform reference-based occurrences
Pollen and age analysis of terrestrial plant wax from ODP Hole 175-1085A
Quadrige
Queensland Microalgae Collection Database of Identified Species
RB - Rio de Janeiro Botanical Garden Herbarium Collection, http://www.jbrj.gov.br/jabot/formularios/comocitar_jabot.php
Records from the NIWA AllSeaBio marine biology database
REPHY - Réseau d'Observation et de Surveillance du Phytoplancton et de l'Hydrologie dans les eaux littorales
Schatzinsel Norderney
SEEE - Diatomées
Siliceous microfossil occurrence, Site 177-1091
Siliceous microfossil occurrence, Site 177-1092
Siliceous microfossil occurrence, Site 177-1093
Siliceous microfossil occurrence, Site 177-1094
South American Antarctic Marine Biodiversity Literature
SP-Algae - Herbário do Estado "Maria Eneyda P. Kaufmann Fidalgo - Coleção de Algas, http://splink.cria.org.br/manager/detail?resource=SP-Algae
Spring Phytoplankton Assemblages in the Southern Ocean Between Australia and Antarctica (CLIVAR-SR3)
The Australian Phytoplankton Database (1844 onwards)
The cryptogamy collection (PC) at the Herbarium of the Muséum national d'Histoire Naturelle (MNHN - Paris)
The Diatom Collection of Franz Josef Weinzierl at the Botanische Staatssammlung München
The national database for marine data (MADS)
The New York Botanical Garden Herbarium (NY)
Trap data GBN3, 3921 m
Trap data GBZ4, 696 m
Trap data WR2, 1648 m
Trap data WR2, 599 m
University of California Museum of Paleontology
UTEX Culture Collection of Algae at The University of Texas Living Algae Holdings

## Sheet: OBIS datasets
Asia-Pacific Dataset
Atlantic Zone Monitoring Program (AZMP) DFO Quebec region phytoplankton
Atlantic Zone Monitoring Program (AZMP) DFO Quebec region plankton dataset
Atlantic Zone Monitoring Program Maritimes Region (AZMP) plankton datasets. In: Fisheries and Oceans Canada - BioChem archive
Bay of Fundy Species List
Benthic Microalgae Chukchi Sea, 1972
BioChem: Bedford Basin Monitoring Program
BioChem: NS Phytoplankton Monitoring Program
BioChem: Phytoplankton Monitoring in George's Bank and Shelf Area of Nova Scotia
BioChem: Plankton from St. Andrew's NB winter 1914-1915
BioChem: Seston and phytoplankton data from Hudson Bay, 1975
Biodiversity of the North Sea - Helgoland
Biodiversity of the North Sea - Sylt
Biogeographic data from BODC - British Oceanographic Data Centre
Biological observations from the Discovery Investigations 1925-1952
Biota occurrence data from plankton surveys around New Zealand
Brazil_Marine_biota_PhD_MSc_studies
Comportamiento espacio-temporal de la densidad fitoplanctónica en el ańo 2015 Magdalena, Colombia
Composición del fitoplancton en la Isla Cayos de Serrana en la reserva de BIÓSFERA - SEAFLOWER
Composición y distribución espacial del fitoplancton en aguas oceánicas del Caribe sur colombiano
Concentrations of phytoplankton, chlorophyll, POC, dry weight measurements and abiotic data in the surface water of Gazi creek (Kenya) sampled in August 1989
Continuous Plankton Recorder (Phytoplankton)
Continuous Plankton Recorder Dataset (NOAA) - Phytoplankton
Continuous Plankton Recorder Dataset (SAHFOS) - Pacific Phytoplankton
CSIRO, Australian National Algae Culture Collection, Global, 1949-2008
Cysts from plankton from the South Adriatic Sea
DFO Pacific: Phytoplankton collected during an oceanographic study in Nanoose Bay, British Columbia during May and June 1965
DFO-SABS: Phytoplankton monitoring in the southwest Bay of Fundy
Diatoms from SAZ Sediment traps
Diet, Tidal and Vertical Variations of Phytoplankton and Its Environment in Frobisher Bay, Canada, 1980 and 1981
Distribution of surface phytoplankton between New Zealand and Antarctica, December 1957
Electron Micrograph Database
FRB Eastern Arctic Investigations: The Calanus Series
FRB: The Cheticamp Expedition of 1917 - Phytoplankton collection
Ice Diatoms Arctic Basin 1977, 1980
ICES Biological community dataset
ICES Historical Plankton Dataset
Icota - Pelagant
IMOS - AusCPR: Phytoplankton Abundance
IMOS National Reference Stations (NRS) Phytoplankton Abundance and Biovolume
IndOBIS Dataset (40001-42000)
IndOBIS Dataset (48001-50000)
IndOBIS Dataset (50001-52000)
IndOBIS Dataset (58001-60000)
IndOBIS Dataset (64001-66000)
IndOBIS Dataset (66001-68000)
IndOBIS Dataset (68001-70000)
IndOBIS Dataset (86001-88000)
IndOBIS, Indian Ocean Node of OBIS
International Polar Year and Census of Antarctic Marine Life Ross Sea voyage (TAN0802) biodiversity data
Inventory of phytoplankton taxa on the Togolese coast
JODC Dataset
KOBIS database
L4 Plankton Monitoring Programme
MADAGASCAR National Oceanographic Data Centre - Diatoms
MAHON 80-81
Marine Life List of Ireland
McGill University: Phytoplankton collected from St. Margarets Bay between 1966-1967
MICROBIS database
Microphytobenthos in mussel farms - North Adriatic Sea (SosteMiTS Project) 2008-2009
Microphytobenthos North Adriatic-Gulf of Trieste LTER time-series
Microphytobenthos North Adriatic-INTERREG Project
Microphytoplankton along four transects off the Kenyan coast in 1992
National ferrybox project - discrete sampling by IMWM
Network Monitoring phytoplankton
NRC Harmful Phytoplankton Monitoring Project
NRC Harmful Phytoplankton Monitoring Project - Graves Shoal
Nutrients and phytoplankton in Prince Edward Island inlets during late summer to fall
NW pacific deep-sea benthos distribution and abundance (Beneficial Project)
Palma Bay 1991
PANGAEA - Data from Climate variability and El Nińo Southern Oscillation (CENSOR)
PANGAEA - Data from Joint Global Ocean Flux Study (JGOF)
PANGAEA - Data from Physical Oceanography of the Eastern Mediterranean (POEM)
PANGAEA - Data from the Skagerrak experiment (SKAGEX)
PANGAEA - Data from various sources
Phytoplankton Adriatic-SESAME Project
Phytoplankton collected in the Mediterranean Sea in 1959 on board the R/V Akademik S. Vavilov
Phytoplankton data collected during a cruise in the Black Sea in May 1957
Phytoplankton data collected during cruise 22 of R/V Fiolent (December 1987 - April 1988) in the Indian sector of the Southern Ocean
Phytoplankton data collected during cruise 24 of R/V Skif (February - March 1989) in the Indian sector of the Southern Ocean
Phytoplankton data collected during cruise 25 of R/V Skif (January 1990) in the Indian sector of the Southern Ocean
Phytoplankton data collected during cruise 37 (second joint Soviet-American expedition) of R/V Akademik Korolev (July 1984) in the Bering Sea
Phytoplankton data collected during cruise 38 (December 1986 - April 1987) on board of R/V Dmitriy Mendeleev
Phytoplankton data collected during cruise 43 (February - April 1989) of R/V Dmitriy Mendeleev
Phytoplankton data collected during cruises on the R/V Knipovich in 1948 and 1950
Phytoplankton data collected during First Ukrainian Antarctic Expedition (March 1997) on board of R/V Krenkel in Bransfield strait and region of Ukrainian Antarctic Station
Phytoplankton data collected during R/V Issledovatel cruise in October 1948
Phytoplankton data collected during R/V Issledovatel cruise in September 1948
Phytoplankton data collected during Second Ukrainian Antarctic Expedition (March-April 1998) on board of R/V Krenkel
Phytoplankton data collected from a diurnal station in Sevastopol Bay (Black Sea) during 1952
Phytoplankton data collected from diurnal stations in the halistatic region of the Black Sea during April and July 1957
Phytoplankton data collected from the Black Sea during April 1952 (Cruise 3)
Phytoplankton data collected from the Black Sea during November 1957 (Cruise 2)
Phytoplankton data collected from the North-Western part of the Black Sea during August 1957 (Cruise 1)
Phytoplankton data collected from the North-Western part of the Black Sea during August 1957 (Cruise 2)
Phytoplankton data collected in deep waters of the halistatic region of the Black Sea in September 1948
Phytoplankton data collected in the Black Sea along the Tuapse transect in August 1951
Phytoplankton data collected in the Black Sea and Bosporus area during a cruise of the R/V \\"Mgla\"\", year 1968"
Phytoplankton data collected in the Black Sea during 107 cruise of the R/V \\"Kovalevskiy\"\""
Phytoplankton data collected in the Black Sea during 33 cruise of the R/V \\"Professor Vodyanitskiy\"\""
Phytoplankton data collected in the Black Sea during 37 cruise of the R/V \\"Professor Vodyanitskiy\"\""
Phytoplankton data collected in the Black Sea during a cruise of the R/V \\"Experiment\"\""
Phytoplankton data collected in the Black Sea during the 117th cruise of the R/V \\"Kovalevskiy\"\" in 1990"
Phytoplankton data collected in the Black Sea during the 33rd cruise of the R/V \\"Professor Kolesnikov\"\" in 1995"
Phytoplankton data collected in the Black Sea during the 4th cruise of the R/V \\"Kiev\"\" in 1995"
Phytoplankton data collected in the Black Sea during the 5th cruise of the R/V \\"Kiev\"\""
Phytoplankton data collected in the Black Sea in 1958
Phytoplankton data collected in the Black Sea in February 1957
Phytoplankton data collected in the Black Sea, Bosphorus area, Marmara Sea, Aegean Sea, Ionian Sea, Tunisian Strait, and Mediterranean Sea during the 65th cruise of the R/V \\"Kovalevskiy\"\" in 1969-1970"
Phytoplankton data collected in the Black Sea, Bosporus area during a cruise of the R/V \\"Mgla\"\", year 1969"
Phytoplankton data collected in the NW Black Sea along the Tarkhankut transect in April 1952
Phytoplankton data collected near Yalta, Black Sea, in June 1950
Phytoplankton data from the Black Sea collected on R/V Professor Vodyanitskij in November 1991
Phytoplankton data from the Sukhumi region, Black Sea, collected in November 1948
Phytoplankton data of Sevastopol Bay of the Black Sea during 1972
Phytoplankton from the White Sea, Barents Sea, Norwegian Sea and Arctic Basin 1993-2003
Phytoplankton in the Oosterschelde before, during and after the storm-surge barrier (1982-1990)
Phytoplankton monitoring data from a polygon near Belbek River (Black Sea) from 1987 to 1990
Phytoplankton monitoring data from Sevastopol Bay (Black Sea) from 1952 to 1963
Phytoplankton monitoring in the South Adriatic (Adricosm-STAR project), 2008-2009
Phytoplankton monitoring in the Trieste harbour - North Adriatic Sea (FERRIERA), 2008-2014
Phytoplankton monitoring in the Trieste harbour, North Adriatic Sea (Port Authority), March 2015
Phytoplankton monitoring RADIALES - Section off A Coruńa (NW Spain, Galicia); inner-shelf (station depth 77m); sampling depths 0, 5, 10, 20 and 30m
Phytoplankton monitoring RADIALES - Section off Cudillero (N Spain, Cantabrian Sea); mid-shelf (station depth 130m); sampling depths 0, 5, 10,30, 40 and 70m
Phytoplankton monitoring RADIALES - Section off Gijón (N Spain, Cantabrian Sea); mid-shelf (station depth 108m); sampling depths 0, 35 and 70m
Phytoplankton monitoring RADIALES - Section off Vigo (NW Spain, Galicia); coastal (station depth 39m); sampling depths 0, 5, 10 and 30m
Phytoplankton monitoring RADIALES - Section off Vigo (NW Spain, Galicia); mid-shelf (station depth 97m); sampling depths 0, 5, 10, 20 and 30m
Phytoplankton North Adriatic-ALPE ADRIA Project
Phytoplankton North Adriatic-Gulf of Trieste LTER time-series
Phytoplankton North Adriatic-INTERREG-FVG Project
Phytoplankton Occurrence Data from Northeastern Arabian Sea
Phytoplankton occurrence data from Northern Arabian Sea
Phytoplankton of Lebanon
Phytoplankton of the northern part of the Black Sea 1992-1993
Phytoplankton of the Ukrainian Black Sea shelf (1985-2005)
Phytoplankton samples collected near Sochi, Black Sea, in 1974-1975
Phytoplankton South Adriatic-PRISMA1-Flussi Project
Phytoplankton Species Composition, Abundance and Cell Size in San Francisco Bay: Microscopic Analyses of USGS Samples Collected 1992-2014
Phytoplankton Universidad Arturo Prat
Polish Monitoring Programme - Monitoring of the Baltic Sea: phytoplankton
Previous_fisheries_REVIZEE_Program
Records from the NIWA AllSeaBio marine biology database
Romanian Black Sea Phytoplankton data from 1956 - 1960
Semi-quantitive microplankton analysis (Sylt Roads Time Series) in the Wadden Sea off List, Sylt, North Sea in 1987
Semi-quantitive microplankton analysis (Sylt Roads Time Series) in the Wadden Sea off List, Sylt, North Sea in 1988
Semi-quantitive microplankton analysis (Sylt Roads Time Series) in the Wadden Sea off List, Sylt, North Sea in 1989
Semi-quantitive microplankton analysis (Sylt Roads Time Series) in the Wadden Sea off List, Sylt, North Sea in 1990
Semi-quantitive microplankton analysis (Sylt Roads Time Series) in the Wadden Sea off List, Sylt, North Sea in 1991
Semi-quantitive microplankton analysis (Sylt Roads Time Series) in the Wadden Sea off List, Sylt, North Sea in 1992
Semi-quantitive microplankton analysis (Sylt Roads Time Series) in the Wadden Sea off List, Sylt, North Sea in 1993
Semi-quantitive microplankton analysis (Sylt Roads Time Series) in the Wadden Sea off List, Sylt, North Sea in 1994
Semi-quantitive microplankton analysis (Sylt Roads Time Series) in the Wadden Sea off List, Sylt, North Sea in 1995
Semi-quantitive microplankton analysis (Sylt Roads Time Series) in the Wadden Sea off List, Sylt, North Sea in 1996
Semi-quantitive microplankton analysis (Sylt Roads Time Series) in the Wadden Sea off List, Sylt, North Sea in 1997
Semi-quantitive microplankton analysis (Sylt Roads Time Series) in the Wadden Sea off List, Sylt, North Sea in 1998
Semi-quantitive microplankton analysis (Sylt Roads Time Series) in the Wadden Sea off List, Sylt, North Sea in 1999
Semi-quantitive microplankton analysis (Sylt Roads Time Series) in the Wadden Sea off List, Sylt, North Sea in 2000
Semi-quantitive microplankton analysis (Sylt Roads Time Series) in the Wadden Sea off List, Sylt, North Sea in 2001
Semi-quantitive microplankton analysis (Sylt Roads Time Series) in the Wadden Sea off List, Sylt, North Sea in 2002
Semi-quantitive microplankton analysis (Sylt Roads Time Series) in the Wadden Sea off List, Sylt, North Sea in 2003
Semi-quantitive microplankton analysis (Sylt Roads Time Series) in the Wadden Sea off List, Sylt, North Sea in 2004
Semi-quantitive microplankton analysis (Sylt Roads Time Series) in the Wadden Sea off List, Sylt, North Sea in 2005
Semi-quantitive microplankton analysis (Sylt Roads Time Series) in the Wadden Sea off List, Sylt, North Sea in 2006
Semi-quantitive microplankton analysis (Sylt Roads Time Series) in the Wadden Sea off List, Sylt, North Sea in 2007
Semi-quantitive microplankton analysis (Sylt Roads Time Series) in the Wadden Sea off List, Sylt, North Sea in 2008
Semi-quantitive microplankton analysis (Sylt Roads Time Series) in the Wadden Sea off List, Sylt, North Sea in 2009
Semi-quantitive microplankton analysis (Sylt Roads Time Series) in the Wadden Sea off List, Sylt, North Sea in 2010
Semi-quantitive microplankton analysis (Sylt Roads Time Series) in the Wadden Sea off List, Sylt, North Sea in 2011
Semi-quantitive microplankton analysis (Sylt Roads Time Series) in the Wadden Sea off List, Sylt, North Sea in 2012
Semi-quantitive microplankton analysis (Sylt Roads Time Series) in the Wadden Sea off List, Sylt, North Sea in 2013
SHARK - Marine phytoplankton monitoring in Sweden since 1983
South American Antarctic Marine Biodiversity Literature
Southeast BR Mangrove
Spring Phytoplankton Assemblages in the Southern Ocean Between Australia and Antarctica (CLIVAR-SR3)
Taxonomic Information System for the Belgian coastal area
The Australian Phytoplankton Database (1844 onwards)
The Canadian Fisheries Expedition, 1914-1915: Investigations in the Gulf of St. Lawrence and Atlantic waters of Canada
UFPE_Oceanography_Zooplankton_Research
World Ocean Database 2009
Zooplankton and phytoplankton densities in the oyster farms of Gazi Creek (Kenya) sampled in October 1992

## Sheet: unique datasets
(Table 1) Abundance of unicellular eukaryotes in ice cores collected during the July 2008 CCGS Amundsen cruise in Darnley Bay
(Table 1) Maximal abundance of dominating species and phytoplankton groups within the Gelendzhik polygon in 2002-2005
(Table 2) Occurrences of diatoms species in DSDP Hole 41-366
(Table 2) Species composition of algae and cyanobacteria encountered in plankton of the Large Aral Sea on June 2-8, 2008
(Table 3) Abundance and biomass of Proboscia alata in patches of its mass development over the Bering Sea middle shelf, percentages of P. alata and associated algae species and their groups in total phytoplankton abundance and biomass
(Table 3) Occurrences of diatoms species in DSDP Hole 41-369A
(Table 3) Protist occurrence in bottom sea ice and surface water samples obtained during a CCGS Amundsen cruise in 2007/2008
(Table 4) Abundance of microalgae in sinking sedimentary material from sediment traps in the northeast Black Sea in September-October 1999
(Table 4a) Abundance of microalgae in surface layer bottom sediments at Station ST-RSh-1 in the northeast Black Sea
(Table T1) Neogene stratigraphy of diatoms, ebridians and endoskeletal dinoflagellates in ODP Hole 183-1138A
Abundance and biomass of phytoplankton in Butakova Bay, Aral Sea, in september 1990
Abundance and biomass of phytoplankton in the Aral Sea
Abundance of algae in the Aral Sea
Abundance of broken diatom frustules measured on water bottle samples at station PS58/009-2
Abundance of broken diatom frustules measured on water bottle samples at station PS58/011-3
Abundance of broken diatom frustules measured on water bottle samples at station PS58/012-5
Abundance of broken diatom frustules measured on water bottle samples at station PS58/014-4
Abundance of broken diatom frustules measured on water bottle samples at station PS58/038-3
Abundance of broken diatom frustules measured on water bottle samples at station PS58/041-2
Abundance of broken diatom frustules measured on water bottle samples at station PS58/042-2
Abundance of broken diatom frustules measured on water bottle samples at station PS58/043-2
Abundance of broken diatom frustules measured on water bottle samples at station PS58/045-2
Abundance of broken diatom frustules measured on water bottle samples at station PS58/046-3
Abundance of broken diatom frustules measured on water bottle samples at station PS58/048-3
Abundance of broken diatom frustules measured on water bottle samples at station PS58/049-3
Abundance of broken diatom frustules measured on water bottle samples at station PS58/061-3
Abundance of broken diatom frustules measured on water bottle samples at station PS58/088-4
Abundance of broken diatom frustules measured on water bottle samples at station PS58/090-4
Abundance of broken diatom frustules measured on water bottle samples at station PS58/091-4
Abundance of broken diatom frustules measured on water bottle samples at station PS58/092-3
Abundance of broken diatom frustules measured on water bottle samples at station PS58/107-5
Abundance of broken diatom frustules measured on water bottle samples at station PS58/108-1
Abundance of empty diatom frustules measured on water bottle samples at station PS58/009-2
Abundance of empty diatom frustules measured on water bottle samples at station PS58/011-3
Abundance of empty diatom frustules measured on water bottle samples at station PS58/012-5
Abundance of empty diatom frustules measured on water bottle samples at station PS58/014-4
Abundance of empty diatom frustules measured on water bottle samples at station PS58/038-3
Abundance of empty diatom frustules measured on water bottle samples at station PS58/041-2
Abundance of empty diatom frustules measured on water bottle samples at station PS58/042-2
Abundance of empty diatom frustules measured on water bottle samples at station PS58/043-2
Abundance of empty diatom frustules measured on water bottle samples at station PS58/045-2
Abundance of empty diatom frustules measured on water bottle samples at station PS58/046-3
Abundance of empty diatom frustules measured on water bottle samples at station PS58/048-3
Abundance of empty diatom frustules measured on water bottle samples at station PS58/049-3
Abundance of empty diatom frustules measured on water bottle samples at station PS58/061-3
Abundance of empty diatom frustules measured on water bottle samples at station PS58/088-4
Abundance of empty diatom frustules measured on water bottle samples at station PS58/090-4
Abundance of empty diatom frustules measured on water bottle samples at station PS58/091-4
Abundance of empty diatom frustules measured on water bottle samples at station PS58/092-3
Abundance of empty diatom frustules measured on water bottle samples at station PS58/107-5
Abundance of empty diatom frustules measured on water bottle samples at station PS58/108-1
Abundance of microplanton determined from water bottle samples during AEGAEO cruise LIA-8
Abundance of phytoplankton in surface water during THALASSA campaign PROSOPE
Algaterra Types
Antarctic Marine Protists species checklist
Anymals+plants - Citizen Science Data
Arctic Ocean Diversity
Artenvielfalt der Nordsee - Bremerhaven (Dorum-Neufeld)
Artenvielfalt der Nordsee - Helgoland
Artenvielfalt der Nordsee - Sylt
Artportalen (Swedish Species Observation System)
Asia-Pacific Dataset
Atlantic Zone Monitoring Program (AZMP) DFO Quebec region phytoplankton
Atlantic Zone Monitoring Program (AZMP) DFO Quebec region plankton dataset
Atlantic Zone Monitoring Program Maritimes Region (AZMP) plankton datasets. In: Fisheries and Oceans Canada - BioChem archive
Banco de Datos de la Biodiversidad de la Comunitat Valenciana
Bay of Fundy Species List
Benthic Microalgae Chukchi Sea 1972
Benthic Microalgae Chukchi Sea, 1972
BioChem: Bedford Basin Monitoring Program
BioChem: NS Phytoplankton Monitoring Program
BioChem: Phytoplankton Monitoring in George's Bank and Shelf Area of Nova Scotia
BioChem: Plankton from St. Andrew's NB winter 1914-1915
BioChem: Seston and phytoplankton data from Hudson Bay 1975
Biodiversidad de productores primarios de las lagunas costeras del norte de Yucatán
Biodiversidad del microfitoplancton marino en la zona económica exclusiva limítrofe del Pacífico central mexicano
Biodiversidad fitoplanctónica de cenotes: Patrones espaciales y temporales
Biodiversity of the North Sea - Helgoland
Biodiversity of the North Sea - Sylt
Biogeographic data from BODC - British Oceanographic Data Centre
Biological observations from the Discovery Investigations 1925-1952
Biota occurrence data from plankton surveys around New Zealand
Botanical Museum, Copenhagen. Database of type specimens
Botany (UPS)
Brazil_Marine_biota_PhD_MSc_studies
cariaco-phytoplankton, http://www.pnas.org/cgi/doi/10.1073/pnas.1207514109
CIM Specimens
Comportamiento espacio-temporal de la densidad fitoplanctónica en el año 2015 Magdalena Colombia
Comportamiento espacio-temporal de la densidad fitoplanctónica en el año 2015 Magdalena, Colombia, http://doi.org/10.15472/fzgoop
Composición del fitoplancton en la Isla Cayos de Serrana en la reserva de BIÓSFERA - SEAFLOWER
Composición y distribución espacial del fitoplancton en aguas oceánicas del Caribe sur colombiano
Composición y distribución espacial del fitoplancton en aguas oceánicas del Caribe sur colombiano, http://doi.org/10.15472/lz7nnc
Concentration of siliceous microplankton in surface sediments, brine
Concentration of siliceous microplankton in surface sediments, size fraction > 40 µm
Concentration of siliceous microplankton in surface sediments, size fraction 20-40 µm
Concentrations of phytoplankton chlorophyll POC dry weight measurements and abiotic data in the surface water of Gazi creek (Kenya) sampled in August 1989
Content of different diatom species in sediment core GIK23259-2
Continuous Plankton Recorder (Phytoplankton)
Continuous Plankton Recorder Dataset (NOAA) - Phytoplankton
Continuous Plankton Recorder Dataset (SAHFOS)
Continuous Plankton Recorder Dataset (SAHFOS) - Pacific Phytoplankton
CSIRO Australian National Algae Culture Collection Global 1949-2008
CSIRO, Australian National Algae Culture Collection, Global, 1949-2008, CSIRO:ANACC_1949_2008
Culture Collection of Algae
Cysts from plankton from the South Adriatic Sea
DFO Pacific: Phytoplankton collected during an oceanographic study in Nanoose Bay British Columbia during May and June 1965
DFO-SABS: Phytoplankton monitoring in the southwest Bay of Fundy
Diatom abundance measured on water bottle samples at station PS58/009-2
Diatom abundance measured on water bottle samples at station PS58/011-3
Diatom abundance measured on water bottle samples at station PS58/012-5
Diatom abundance measured on water bottle samples at station PS58/014-4
Diatom abundance measured on water bottle samples at station PS58/038-3
Diatom abundance measured on water bottle samples at station PS58/041-2
Diatom abundance measured on water bottle samples at station PS58/042-2
Diatom abundance measured on water bottle samples at station PS58/043-2
Diatom abundance measured on water bottle samples at station PS58/045-2
Diatom abundance measured on water bottle samples at station PS58/046-3
Diatom abundance measured on water bottle samples at station PS58/048-3
Diatom abundance measured on water bottle samples at station PS58/049-3
Diatom abundance measured on water bottle samples at station PS58/061-3
Diatom abundance measured on water bottle samples at station PS58/088-4
Diatom abundance measured on water bottle samples at station PS58/090-4
Diatom abundance measured on water bottle samples at station PS58/091-4
Diatom abundance measured on water bottle samples at station PS58/092-3
Diatom abundance measured on water bottle samples at station PS58/107-5
Diatom abundance measured on water bottle samples at station PS58/108-1
Diatom assamblage in samples from sediment trap NB6
Diatom assamblage in samples from sediment trap OG3
Diatom assamblage in samples from sediment trap OG4
Diatom assamblage in samples from sediment trap OG5
Diatomeas (Bacillariophyceae) y dinoflageladas (Dinophyceae) frecuentes en el Pacífico mexicano (costa oeste de Baja California, Pacífico centro y sur)
Diatomeas (Bacillariophyceae) y dinoflageladas (Dinophyceae) planctónicas más frecuentes en el Golfo de California
Diatomeas (Bacillariophyceae) y Dinoflageladas (Dinophyceae) planctónicas más frecuentes en la región sur del Golfo de México
Diatoms from SAZ Sediment traps
Diatoms from the Vestfold Hills Lakes
Diet Tidal and Vertical Variations of Phytoplankton and Its Environment in Frobisher Bay Canada 1980 and 1981
Diet, Tidal and Vertical Variations of Phytoplankton and Its Environment in Frobisher Bay, Canada, 1980 and 1981
Distribution of surface phytoplankton between New Zealand and Antarctica December 1957
Distribution of surface phytoplankton between New Zealand and Antarctica, December 1957, Southwestern Pacific OBIS (2014)
Diversidad y dinámica del fitoplancton marino en la bahía de Acapulco, Guerrero
Dutch Foundation for Applied Water Research (STOWA) - Limnodata Neerlandica
Electron Micrograph Database
Electron Micrograph Database - Marine Specimens
Electron Micrograph Database - Terrestrial and Limnetic Specimens
Estimated plankton abundance at station PS63/064-6
Fitoplancton marino frente a Baja California. 1. Bahía de Todos Santos, BC
Fitoplancton marino frente a Baja California. 2. Áreas de surgencias de la región Ensenadense
flora & fauna(NIBR)
FRB Eastern Arctic Investigations: The Calanus Series
FRB: The Cheticamp Expedition of 1917 - Phytoplankton collection
Geographically tagged INSDC sequences
Gesamtartenliste Bremerhaven, Helgoland und Sylt
Global Lacustrine Diatoms
HAS-Algae - Coleção Ficológica do HAS, http://splink.cria.org.br/manager/detail?resource=HAS-Algae
Herbarium of Umeå University (UME)
Ice Diatoms Arctic Basin 1977, 1980
ICES Biological community dataset
ICES Historical Plankton Dataset
Icota - Pelagant
IMOS - AusCPR: Phytoplankton Abundance
IMOS - AusCPR: Phytoplankton Abundance, http://dx.doi.org/10.1016/j.pocean.2005.09.011
IMOS National Reference Stations (NRS) Phytoplankton Abundance and Biovolume
iNaturalist Research-grade Observations
IndOBIS Dataset (40001-42000)
IndOBIS Dataset (48001-50000)
IndOBIS Dataset (50001-52000)
IndOBIS Dataset (58001-60000)
IndOBIS Dataset (64001-66000)
IndOBIS Dataset (66001-68000)
IndOBIS Dataset (68001-70000)
IndOBIS Dataset (86001-88000)
IndOBIS Indian Ocean Node of OBIS
IndOBIS, Indian Ocean Node of OBIS
International Polar Year and Census of Antarctic Marine Life Ross Sea voyage (TAN0802) biodiversity data
Inventory of phytoplankton taxa on the Togolese coast
Ireland's BioBlitz
JODC Dataset
KOBIS database
L4 Plankton Monitoring Programme
Lund Botanical Museum (LD)
MADAGASCAR National Oceanographic Data Centre - Diatoms
MAHON 80-81
Marine Life List of Ireland
McGill University: Phytoplankton collected from St. Margarets Bay between 1966-1967
Merseyside BioBank (unverified)
Microbial Culture Collection, National Institute for Environmental Studies
MICROBIS database
Microfossil abundance of Hole 16-157
Microfossil abundance of Hole 16-157A
Microfossil abundance of Hole 16-158
Microphytobenthos in mussel farms - North Adriatic Sea (SosteMiTS Project) 2008-2009
Microphytobenthos North Adriatic-Gulf of Trieste LTER time-series
Microphytobenthos North Adriatic-INTERREG Project
Microphytoplankton along four transects off the Kenyan coast in 1992
Microplankton abundance at Station MARCH-1997-GN36199704601MSB01 in the euphotic zone of the Aegean Sea in spring 1997. Part 1 - diatoms
Microplankton abundance at Station MARCH-1997-GN36199704601MSB02 in the euphotic zone of the Aegean Sea in spring 1997. Part 1 - diatoms
Microplankton abundance at Station MARCH-1997-GN36199704601MSB06 in the euphotic zone of the Aegean Sea in spring 1997. Part 1 - diatoms
Microplankton abundance at Station MARCH-1997-GN36199704601MSB07 in the euphotic zone of the Aegean Sea in spring 1997. Part 1 - diatoms
Microplankton abundance at Station MARCH-1997-GN36199704603MNB03 in the euphotic zone of the Aegean Sea in spring 1997. Part 1 - diatoms
Microplankton abundance at Station MARCH-1997-GN36199704603MNB04 in the euphotic zone of the Aegean Sea in spring 1997. Part 1 - diatoms
Microplankton abundance at Station MARCH-1998-GN36199804610MSB01 in the euphotic zone of the Aegean Sea in March 1998. Part 1 - diatoms
Microplankton abundance at Station MARCH-1998-GN36199804610MSB03 in the euphotic zone of the Aegean Sea in March 1998. Part 1 - diatoms
Microplankton abundance at Station MARCH-1998-GN36199804611MNB01 in the euphotic zone of the Aegean Sea in March 1998. Part 1 - diatoms
Microplankton abundance at Station MARCH-1998-GN36199804611MNB02 in the euphotic zone of the Aegean Sea in March 1998. Part 1 - diatoms
Microplankton abundance at Station MARCH-1998-GN36199804611MNB03 in the euphotic zone of the Aegean Sea in March 1998. Part 1 - diatoms
Microplankton abundance in the euphotic zone of the Aegean and Levantine Seas in August-September 1989
Microplankton abundance in the euphotic zone of the Aegean and Levantine Seas in February 1989
Microplankton abundance in the euphotic zone of the Aegean and Levantine Seas in September-October 1987
Microplankton abundance in the euphotic zone of the Aegean Sea at Station JUNE-94-GN3619940280200260
Microplankton abundance in the euphotic zone of the Aegean Sea at Station JUNE-94-GN3619940280200320
Microplankton abundance in the euphotic zone of the Aegean Sea at Station JUNE-94-GN3619940280200500
Microplankton abundance in the euphotic zone of the Aegean Sea at Station JUNE-94-GN3619940280200590
Microplankton abundance in the euphotic zone of the Aegean Sea at Station JUNE-94-GN3619940280200800
Microplankton abundance in the euphotic zone of the Aegean Sea at Station MARCH-94-GN3619940280100260
Microplankton abundance in the euphotic zone of the Aegean Sea at Station MARCH-94-GN3619940280100320
Microplankton abundance in the euphotic zone of the Aegean Sea at Station MARCH-94-GN3619940280100500
Microplankton abundance in the euphotic zone of the Aegean Sea at Station MARCH-94-GN3619940280100590
Microplankton abundance in the euphotic zone of the Aegean Sea at Station MARCH-94-GN3619940280100800
Microplankton abundance in the euphotic zone of the Aegean Sea in October-November 1991
Microplankton abundance in the euphotic zone of the Aegean Sea in September 1994
Microplankton abundance in the euphotic zone of the Aegean Sea in winter 1995
Microplankton abundance in the euphotic zone of the Aegean, Levantine and Ionian Seas in March-April 1987
Microplankton abundance in the euphotic zone of the Aegean, Levantine and Ionian Seas in March-April 1992
Microplankton abundance in the euphotic zone of the Ionian Sea in October-November 1991
Microplankton abundance in the euphotic zone of the Levantine Sea in October-November 1991
Microplankton abundance in the euphotic zone of the South Aegean, Levantine and Ionian Seas in March-April 1986
Microplankton abundance measured on water bottle samples during AEGAEO cruise LIA-7
National ferrybox project - discrete sampling by IMWM
Natural History Museum (London) Collection Specimens, http://dx.doi.org/10.5519/0002965
Naturalis Biodiversity Center (NL) - Botany
Neptune Deep-Sea Microfossil Occurrence Database
Network Monitoring phytoplankton
NMNH Extant Specimen Records
Norwegian Biodiversity Information Centre - Other datasets
NRC Harmful Phytoplankton Monitoring Project
NRC Harmful Phytoplankton Monitoring Project - Graves Shoal
Nutrients and phytoplankton in Prince Edward Island inlets during late summer to fall
NW pacific deep-sea benthos distribution and abundance (Beneficial Project)
Paleobiology Database
Palma Bay 1991
Palynological analysis of sediment core GeoB3910-2
PANGAEA - Data from Climate variability and El Niño Southern Oscillation (CENSOR)
PANGAEA - Data from Joint Global Ocean Flux Study (JGOF)
PANGAEA - Data from Physical Oceanography of the Eastern Mediterranean (POEM)
PANGAEA - Data from the Skagerrak experiment (SKAGEX)
PANGAEA - Data from various sources
Patrones de variación espacial y temporal de la biodiversidad fitoplanctónica de los cenotes abiertos de Yucatán
Phytoplankton abundance along the track of Akademik Vernadsky cruise AV5
Phytoplankton abundance and biomass measured on water bottle samples during POLARSTERN cruise ANT-X/6
Phytoplankton abundance and species composition in the Gulf of Naples and the Gulf Salerno in November 1985
Phytoplankton abundance and species composition in the Gulf of Naples from February to December 1987
Phytoplankton abundance and species composition in the Gulf of Naples in June 1999 at station MCSSII-phyto102-110
Phytoplankton abundance and species composition in the Gulf of Naples in June 1999 at station MCSSII-phyto111-119
Phytoplankton abundance and species composition in the Gulf of Naples in June 1999 at station MCSSII-phyto120-128
Phytoplankton abundance and species composition in the Gulf of Naples in June 1999 at station MCSSII-phyto129-136
Phytoplankton abundance and species composition in the Gulf of Naples in June 1999 at station MCSSII-phyto66-74
Phytoplankton abundance and species composition in the Gulf of Naples in June 1999 at station MCSSII-phyto75-83
Phytoplankton abundance and species composition in the Gulf of Naples in June 1999 at station MCSSII-phyto84-92
Phytoplankton abundance and species composition in the Gulf of Naples in March 1999 at Station MCSSI-phyto1-10
Phytoplankton abundance and species composition in the Gulf of Naples in March 1999 at Station MCSSI-phyto11-19
Phytoplankton abundance and species composition in the Gulf of Naples in March 1999 at Station MCSSI-phyto20-28
Phytoplankton abundance and species composition in the Gulf of Naples in March 1999 at Station MCSSI-phyto29-38
Phytoplankton abundance and species composition in the Gulf of Naples in March 1999 at Station MCSSI-phyto39-47
Phytoplankton abundance and species composition in the Gulf of Naples in March 1999 at Station MCSSI-phyto48-56
Phytoplankton abundance and species composition in the Gulf of Naples in March 1999 at Station MCSSI-phyto57-65
Phytoplankton abundance and species composition in the North Balearic Sea in March 2003
Phytoplankton abundance and species composition in the Sicily Channel in October 1991
Phytoplankton abundance and species composition in the Tyrrhenian Sea in November 1981
Phytoplankton abundance at bottle station A1/52
Phytoplankton abundance at bottle station A3/66A
Phytoplankton abundance at bottle station A8/2
Phytoplankton abundance at bottle station A9/5
Phytoplankton abundance at bottle station GOM1/6
Phytoplankton abundance at bottle station GOM2/7
Phytoplankton abundance at bottle station GOM3/1
Phytoplankton abundance at bottle station GOM4/1
Phytoplankton abundance at bottle station GOM5/4
Phytoplankton abundance at bottle station GOM6/1
Phytoplankton abundance at several bottle stations in may 1996, Pisco, Peru
Phytoplankton abundance at several bottle stations in May 1996, Sechura, Peru
Phytoplankton abundance at several stations in December 2004, Chipana, Chile
Phytoplankton abundance at several stations in January 2005, Chipana, Chile
Phytoplankton abundance at station Casma_2003-02-15_2, Casma, Peru
Phytoplankton abundance at station Casma_2003-02-27_1, Casma, Peru
Phytoplankton abundance at station Casma_2003-02-27_2, Casma, Peru
Phytoplankton abundance at station Casma_2003-03-13_1, Casma, Peru
Phytoplankton abundance at station Casma_2003-03-13_2, Casma, Peru
Phytoplankton abundance at station Casma_2003-03-27_1, Casma, Peru
Phytoplankton abundance at station Casma_2003-03-27_2, Casma, Peru
Phytoplankton abundance at station Casma_2003-04-14_1, Casma, Peru
Phytoplankton abundance at station Casma_2003-04-14_2, Casma, Peru
Phytoplankton abundance at station Casma_2003-04-28_1, Casma, Peru
Phytoplankton abundance at station Casma_2003-04-28_2, Casma, Peru
Phytoplankton abundance at station Casma_2003-06-04_1, Casma, Peru
Phytoplankton abundance at station Casma_2003-06-04_2, Casma, Peru
Phytoplankton abundance at station Casma_2003-06-24_1, Casma, Peru
Phytoplankton abundance at station Casma_2003-06-24_2, Casma, Peru
Phytoplankton abundance at station CD46_0105C#2
Phytoplankton abundance at station CD46_0405C#7
Phytoplankton abundance at station CD46_0705C#4
Phytoplankton abundance at station CD46_1005C#4
Phytoplankton abundance at station CD46_1305C#2
Phytoplankton abundance at station CD46_2005C#4
Phytoplankton abundance at station CD47_0306C#7
Phytoplankton abundance at station CD47_0606C#7
Phytoplankton abundance at station CD47_0906C#6
Phytoplankton abundance at station CD47_1206C#7
Phytoplankton abundance at station CD47_2805C#5
Phytoplankton abundance at station CD47_3105C#4
Phytoplankton abundance at station DI182_11860#6
Phytoplankton abundance at station DI182_11862#3
Phytoplankton abundance at station DI182_11863#1
Phytoplankton abundance at station DI182_11864#61
Phytoplankton abundance at station Rigel_1_2005-02 in Febraury 2005, Chipana, Chile
Phytoplankton abundance at station Rigel_1_2005-03 in March 2005, Chipana, Chile
Phytoplankton abundance at station Rigel_1_2005-05 in May 2005, Chipana, Chile
Phytoplankton abundance at station Rigel_1_2005-07 in July 2005, Chipana, Chile
Phytoplankton abundance at station Rigel_2_2005-02 in Febraury 2005, Chipana, Chile
Phytoplankton abundance at station Rigel_2_2005-04 in April 2005, Chipana, Chile
Phytoplankton abundance at station Rigel_2_2005-05 in May 2005, Chipana, Chile
Phytoplankton abundance at station Rigel_2_2005-07 in July 2005, Chipana, Chile
Phytoplankton abundance at station Rigel_2_2005-08 in August 2005, Chipana, Chile
Phytoplankton abundance at station Rigel_3_2005-02 in Febraury 2005, Chipana, Chile
Phytoplankton abundance at station Rigel_3_2005-05 in May 2005, Chipana, Chile
Phytoplankton abundance at station Rigel_3_2005-07 in July 2005, Chipana, Chile
Phytoplankton abundance at station Rigel_3_2005-08 in August 2005, Chipana, Chile
Phytoplankton abundance at station Rigel_4_2005-07 in July 2005, Chipana, Chile
Phytoplankton abundance at station Rigel_4_2005-08 in August 2005, Chipana, Chile
Phytoplankton abundance at station Rigel_5_2005-02 in Febraury 2005, Chipana, Chile
Phytoplankton abundance at station Rigel_5_2005-07 in July 2005, Chipana, Chile
Phytoplankton abundance at station Rigel_5_2005-08 in August 2005, Chipana, Chile
Phytoplankton abundance at station Rigel_6_2005-07 in July 2005, Chipana, Chile
Phytoplankton abundance at station Rigel_6_2005-08 in August 2005, Chipana, Chile
Phytoplankton abundance at station Sechin_2003-07-15_1, Casma, Peru
Phytoplankton abundance at station Sechin_2003-07-15_2, Casma, Peru
Phytoplankton abundance at station Sechin_2003-08-06_1, Casma, Peru
Phytoplankton abundance at station Sechin_2003-08-06_2, Casma, Peru
Phytoplankton abundance at station Sechin_2003-08-27_1, Casma, Peru
Phytoplankton abundance at station Sechin_2003-08-27_2, Casma, Peru
Phytoplankton abundance at station Sechin_2003-09-18_1, Casma, Peru
Phytoplankton abundance at station Sechin_2003-09-18_2, Casma, Peru
Phytoplankton abundance at station Sechin_2003-10-03_1, Casma, Peru
Phytoplankton abundance at station Sechin_2003-10-03_2, Casma, Peru
Phytoplankton abundance at station Sechin_2003-10-22_1, Casma, Peru
Phytoplankton abundance at station Sechin_2003-10-22_2, Casma, Peru
Phytoplankton abundance at station Sechin_2003-11-06_1, Casma, Peru
Phytoplankton abundance at station Sechin_2003-11-06_2, Casma, Peru
Phytoplankton abundance at station Sechin_2003-11-25_1, Casma, Peru
Phytoplankton abundance at station Sechin_2003-11-25_2, Casma, Peru
Phytoplankton abundance at station Sechin_2003-12-03_1, Casma, Peru
Phytoplankton abundance at station Sechin_2003-12-10_1, Casma, Peru
Phytoplankton abundance at station Sechin_2003-12-10_2, Casma, Peru
Phytoplankton abundance at station Sechin_2003-12-17_1, Casma, Peru
Phytoplankton abundance at station Sechin_2003-12-17_2, Casma, Peru
Phytoplankton abundance at station Sechin_2003-12-28_1, Casma, Peru
Phytoplankton abundance at station Sechin_2003-12-28_2, Casma, Peru
Phytoplankton abundance at station Sechin_EP1 in 2002, Casma, Peru
Phytoplankton abundance at Station Sechin_EP2 in 2002, Casma, Peru
Phytoplankton abundance at stations off Paita in August 1995, Piura, Peru
Phytoplankton abundance at stations off Punta Falsa in August 1995, Piura, Peru
Phytoplankton abundance at the sea bottom off Sechura in january 2007, Peru
Phytoplankton abundance during Akademik Vernadsky cruise AV22
Phytoplankton abundance during Akademik Vernadsky cruise AV5
Phytoplankton abundance during Alexander von Humboldt cruise AvH90/4
Phytoplankton abundance during ARGOS cruise Argos90/8
Phytoplankton abundance during ARGOS cruise Argos91/5
Phytoplankton abundance during Arne Tiselius cruise AT91/2
Phytoplankton abundance during Arnold Veimer cruise AV90/2
Phytoplankton abundance during G. M. Dannevig cruise GMD90/12
Phytoplankton abundance during G. M. Dannevig cruise GMD90/18
Phytoplankton abundance during G. M. Dannevig cruise GMD91/10
Phytoplankton abundance during Gunnar Thorson cruise GT90/5
Phytoplankton abundance during Lev Titov cruise LT90/2
Phytoplankton abundance during Lev Titov cruise LT90/5
Phytoplankton abundance during Lev Titov cruise LT91
Phytoplankton abundance during Mikhail Lomonosov cruise ML47
Phytoplankton abundance during OCEANIA cruise Oceania90
Phytoplankton abundance during Professor Siedlecki cruise PSied90/1
Phytoplankton abundance during Professor Vodyanitskiy cruise PV13
Phytoplankton abundance during Professor Vodyanitskiy cruise PV23
Phytoplankton abundance during Professor Vodyanitskiy cruise PV30_1
Phytoplankton abundance during Professor Vodyanitskiy cruise PV4
Phytoplankton abundance during Professor Vodyanitskiy cruise PV5
Phytoplankton abundance during Professor Vodyanitskiy cruise PV8
Phytoplankton abundance during Trygve Braarud cruise TB90
Phytoplankton abundance duringG. O. Sars cruise GS90/6
Phytoplankton abundance in surface water during Akademik Vernadsky cruise AV22
Phytoplankton abundance in surface water during Akademik Vernadsky cruise AV24
Phytoplankton abundance in surface water during cruise Alkor 237-1
Phytoplankton abundance in surface water during cruise CD60
Phytoplankton abundance in surface water during cruise CD61
Phytoplankton abundance in surface water during Professor Vodyanitskiy cruise PV30_1
Phytoplankton abundance in surface water in August 1997, Pisco, Peru
Phytoplankton abundance in surface water in February 1998, Chimbote, Peru
Phytoplankton abundance in surface water in February 1998, Ilo, Peru
Phytoplankton abundance in surface water in February 1998, Paita, Peru
Phytoplankton abundance in surface water in February 1998, Pisco, Peru
Phytoplankton abundance in surface water in January 1996, Callao, Peru
Phytoplankton abundance in surface water in January 1996, Chimbote, Peru
Phytoplankton abundance in surface water in January 1996, Ilo, Peru
Phytoplankton abundance in surface water in January 1996, Paita, Peru
Phytoplankton abundance in surface water in January 1996, Pisco, Peru
Phytoplankton abundance in surface water in January 2007, Sechura Bay, Peru
Phytoplankton abundance in surface water in July-August 1996, Callao, Peru
Phytoplankton abundance in surface water in July-August 1996, Chimbote, Peru
Phytoplankton abundance in surface water in July-August 1996, Ilo, Peru
Phytoplankton abundance in surface water in July-August 1996, Paita, Peru
Phytoplankton abundance in surface water in July-August 1996, Pisco, Peru
Phytoplankton abundance in surface water in June 1997, Callao, Peru
Phytoplankton abundance in surface water in June 1997, Chimbote, Peru
Phytoplankton abundance in surface water in June 1997, Ilo, Peru
Phytoplankton abundance in surface water in June 1997, Paita, Peru
Phytoplankton abundance in surface water in June 1997, Pisco, Peru
Phytoplankton abundance in surface water in March 1997, Ilo, Peru
Phytoplankton abundance in surface water in March 1997, Pisco, Peru
Phytoplankton abundance in surface water in May 1996, Chimbote, Peru
Phytoplankton abundance in surface water in May 1996, Ilo, Peru
Phytoplankton abundance in surface water in May 1996, Pisco, Peru
Phytoplankton abundance in surface water in May 1997, Callao, Peru
Phytoplankton abundance in surface water in November 1997, Chimbote, Peru
Phytoplankton abundance in surface water in November 1997, Ilo, Peru
Phytoplankton abundance in surface water in November 1997, Paita, Peru
Phytoplankton abundance in surface water in November 1997, Pisco, Peru
Phytoplankton abundance in surface water in October 1995, Chimbote, Peru
Phytoplankton abundance in surface water in October 1995, Ilo, Peru
Phytoplankton abundance in surface water in October 1996, Callao, Peru
Phytoplankton abundance in surface water in October 1996, Chimbote, Peru
Phytoplankton abundance in surface water in October 1996, Ilo, Peru
Phytoplankton abundance in surface water in October 1996, Paita, Peru
Phytoplankton abundance in surface water in October 1996, Pisco, Peru
Phytoplankton abundance in surface water in October 1997, Callao, Peru
Phytoplankton abundance in surface water in October 1997, Chimbote, Peru
Phytoplankton abundance in surface water in October 1997, Ilo Peru
Phytoplankton abundance in surface water in October 1997, Paita, Peru
Phytoplankton abundance in surface water in October 1997, Pisco, Peru
Phytoplankton abundance in surface water in September 1996, Callao, Peru
Phytoplankton abundance in surface water in September 1996, Chimbote, Peru
Phytoplankton abundance in surface water in September 1996, Ilo, Peru
Phytoplankton abundance in surface water in September 1996, Paita, Peru
Phytoplankton abundance in surface water in September 1996, Pisco, Peru
Phytoplankton abundance in surface water in September 1997, Chimbote, Peru
Phytoplankton abundance in surface water in September 1997, Ilo, Peru
Phytoplankton abundance in surface water in September 1997, Pisco, Peru
Phytoplankton abundance measured in surface water during Charles Darwin cruise CD85
Phytoplankton abundance measured in surface water during DISCOVERY cruise D217
Phytoplankton abundance measured on water bottle samples at station PS65/424-3
Phytoplankton abundance measured on water bottle samples at station PS65/427-1
Phytoplankton abundance measured on water bottle samples at station PS65/466-2
Phytoplankton abundance measured on water bottle samples at station PS65/470-1
Phytoplankton abundance measured on water bottle samples at station PS65/508-2
Phytoplankton abundance measured on water bottle samples at station PS65/514-2
Phytoplankton abundance measured on water bottle samples at station PS65/522-1
Phytoplankton abundance measured on water bottle samples at station PS65/545-1
Phytoplankton abundance measured on water bottle samples at station PS65/546-2
Phytoplankton abundance measured on water bottle samples at station PS65/553-3
Phytoplankton abundance measured on water bottle samples at station PS65/570-4
Phytoplankton abundance measured on water bottle samples at station PS65/580-2
Phytoplankton abundance measured on water bottle samples at station PS65/587-1
Phytoplankton abundance measured on water bottle samples at station PS65/593-3
Phytoplankton abundance measured on water samples from rivers of the Lena Delta in 2009
Phytoplankton abundance off Chao island in Juli 2003, Peru
Phytoplankton abundance off Guañape bay in Juli 2003, Peru
Phytoplankton abundance off Guañape islands in Juli 2003, Peru
Phytoplankton Adriatic-SESAME Project
Phytoplankton collected in the Mediterranean Sea in 1959 on board the R/V Akademik S. Vavilov
Phytoplankton data collected during a cruise in the Black Sea in May 1957
Phytoplankton data collected during cruise 22 of R/V Fiolent (December 1987 - April 1988) in the Indian sector of the Southern Ocean
Phytoplankton data collected during cruise 24 of R/V Skif (February - March 1989) in the Indian sector of the Southern Ocean
Phytoplankton data collected during cruise 25 of R/V Skif (January 1990) in the Indian sector of the Southern Ocean
Phytoplankton data collected during cruise 37 (second joint Soviet-American expedition) of R/V Akademik Korolev (July 1984) in the Bering Sea
Phytoplankton data collected during cruise 38 (December 1986 - April 1987) on board of R/V Dmitriy Mendeleev
Phytoplankton data collected during cruise 43 (February - April 1989) of R/V Dmitriy Mendeleev
Phytoplankton data collected during cruises on the R/V Knipovich in 1948 and 1950
Phytoplankton data collected during First Ukrainian Antarctic Expedition (March 1997) on board of R/V Krenkel in Bransfield strait and region of Ukrainian Antarctic Station
Phytoplankton data collected during R/V Issledovatel cruise in October 1948
Phytoplankton data collected during R/V Issledovatel cruise in September 1948
Phytoplankton data collected during Second Ukrainian Antarctic Expedition (March-April 1998) on board of R/V Krenkel
Phytoplankton data collected from a diurnal station in Sevastopol Bay (Black Sea) during 1952
Phytoplankton data collected from a diurnal station in Sevastopol Bay (Black Sea) during 1952, https://doi.org/10.14284/59
Phytoplankton data collected from diurnal stations in the halistatic region of the Black Sea during April and July 1957
Phytoplankton data collected from the Black Sea during April 1952 (Cruise 3)
Phytoplankton data collected from the Black Sea during November 1957 (Cruise 2)
Phytoplankton data collected from the North-Western part of the Black Sea during August 1957 (Cruise 1)
Phytoplankton data collected from the North-Western part of the Black Sea during August 1957 (Cruise 2)
Phytoplankton data collected in deep waters of the halistatic region of the Black Sea in September 1948
Phytoplankton data collected in the Black Sea along the Tuapse transect in August 1951
Phytoplankton data collected in the Black Sea and Bosporus area during a cruise of the R/V "Mgla" year 1968
Phytoplankton data collected in the Black Sea during 107 cruise of the R/V "Kovalevskiy"
Phytoplankton data collected in the Black Sea during 33 cruise of the R/V "Professor Vodyanitskiy"
Phytoplankton data collected in the Black Sea during 37 cruise of the R/V "Professor Vodyanitskiy"
Phytoplankton data collected in the Black Sea during a cruise of the R/V "Experiment"
Phytoplankton data collected in the Black Sea during the 117th cruise of the R/V "Kovalevskiy" in 1990
Phytoplankton data collected in the Black Sea during the 33rd cruise of the R/V "Professor Kolesnikov" in 1995
Phytoplankton data collected in the Black Sea during the 4th cruise of the R/V "Kiev" in 1995
Phytoplankton data collected in the Black Sea during the 5th cruise of the R/V "Kiev"
Phytoplankton data collected in the Black Sea in 1958
Phytoplankton data collected in the Black Sea in February 1957
Phytoplankton data collected in the Black Sea Bosphorus area Marmara Sea Aegean Sea Ionian Sea Tunisian Strait and Mediterranean Sea during the 65th cruise of the R/V "Kovalevskiy" in 1969-1970
Phytoplankton data collected in the Black Sea Bosporus area during a cruise of the R/V "Mgla" year 1969
Phytoplankton data collected in the NW Black Sea along the Tarkhankut transect in April 1952
Phytoplankton data collected near Yalta Black Sea in June 1950
Phytoplankton data from the Black Sea collected on R/V Professor Vodyanitskij in November 1991
Phytoplankton data from the Sukhumi region Black Sea collected in November 1948
Phytoplankton data of Sevastopol Bay of the Black Sea during 1972
Phytoplankton from the White Sea Barents Sea Norwegian Sea and Arctic Basin 1993-2003
Phytoplankton from the White Sea, Barents Sea, Norwegian Sea and Arctic Basin 1993-2003
Phytoplankton in the Oosterschelde before during and after the storm-surge barrier (1982-1990)
Phytoplankton long-term time-series at the fixed coastal station in the Gulf of Naples, data for the years 1984-1991. Part 1
Phytoplankton long-term time-series at the fixed coastal station in the Gulf of Naples, data for the years 1995-1999. Part 1
Phytoplankton long-term time-series at the fixed coastal station in the Gulf of Naples, data for the years 2000-2004. Part 1
Phytoplankton long-term time-series at the fixed coastal station in the Gulf of Naples, data for the years 2005-2006. Part 1
Phytoplankton measured on water bottle samples during THALASSA cruise PROSOPE
Phytoplankton monitoring data from a polygon near Belbek River (Black Sea) from 1987 to 1990
Phytoplankton monitoring data from Sevastopol Bay (Black Sea) from 1952 to 1963
Phytoplankton monitoring in the South Adriatic (Adricosm-STAR project) 2008-2009
Phytoplankton monitoring in the Trieste harbour - North Adriatic Sea (FERRIERA) 2008-2014
Phytoplankton monitoring in the Trieste harbour North Adriatic Sea (Port Authority) March 2015
Phytoplankton monitoring RADIALES - Section off A Coruña (NW Spain Galicia); inner-shelf (station depth 77m); sampling depths 0 5 10 20 and 30m
Phytoplankton monitoring RADIALES - Section off Cudillero (N Spain Cantabrian Sea); mid-shelf (station depth 130m); sampling depths 0 5 10 30 40 and 70m
Phytoplankton monitoring RADIALES - Section off Gijón (N Spain Cantabrian Sea); mid-shelf (station depth 108m); sampling depths 0 35 and 70m
Phytoplankton monitoring RADIALES - Section off Vigo (NW Spain Galicia); coastal (station depth 39m); sampling depths 0 5 10 and 30m
Phytoplankton monitoring RADIALES - Section off Vigo (NW Spain Galicia); mid-shelf (station depth 97m); sampling depths 0 5 10 20 and 30m
Phytoplankton North Adriatic-ALPE ADRIA Project
Phytoplankton North Adriatic-Gulf of Trieste LTER time-series
Phytoplankton North Adriatic-INTERREG-FVG Project
Phytoplankton Occurrence Data from Northeastern Arabian Sea
Phytoplankton occurrence data from Northern Arabian Sea
Phytoplankton of Lebanon
Phytoplankton of the northern part of the Black Sea 1992-1993
Phytoplankton of the Ukrainian Black Sea shelf (1985-2005)
Phytoplankton samples - 2005/06 V3 BROKE-West
Phytoplankton samples - 2006/07 V3 SAZ-Sense
Phytoplankton samples collected near Sochi Black Sea in 1974-1975
Phytoplankton South Adriatic-PRISMA1-Flussi Project
Phytoplankton Species Composition Abundance and Cell Size in San Francisco Bay: Microscopic Analyses of USGS Samples Collected 1992-2014
Phytoplankton Species Composition, Abundance and Cell Size in San Francisco Bay: Microscopic Analyses of USGS Samples Collected 1992-2014, https://doi.org/10.5066/F74F1P6P
Phytoplankton Universidad Arturo Prat
Planktic foraminifera in surface sediments
Plankton abundance measured in surface water during Polarstern cruise ANT-XX/2
PlutoF platform reference-based occurrences
Polish Monitoring Programme - Monitoring of the Baltic Sea: phytoplankton
Pollen and age analysis of terrestrial plant wax from ODP Hole 175-1085A
Previous_fisheries_REVIZEE_Program
Quadrige
Queensland Microalgae Collection Database of Identified Species
RB - Rio de Janeiro Botanical Garden Herbarium Collection, http://www.jbrj.gov.br/jabot/formularios/comocitar_jabot.php
Records from the NIWA AllSeaBio marine biology database
REPHY - Réseau d'Observation et de Surveillance du Phytoplancton et de l'Hydrologie dans les eaux littorales
Romanian Black Sea Phytoplankton data from 1956 - 1960
Schatzinsel Norderney
SEEE - Diatomées
Semi-quantitive microplankton analysis (Sylt Roads Time Series) in the Wadden Sea off List Sylt North Sea in 1987
Semi-quantitive microplankton analysis (Sylt Roads Time Series) in the Wadden Sea off List Sylt North Sea in 1988
Semi-quantitive microplankton analysis (Sylt Roads Time Series) in the Wadden Sea off List Sylt North Sea in 1989
Semi-quantitive microplankton analysis (Sylt Roads Time Series) in the Wadden Sea off List Sylt North Sea in 1990
Semi-quantitive microplankton analysis (Sylt Roads Time Series) in the Wadden Sea off List Sylt North Sea in 1991
Semi-quantitive microplankton analysis (Sylt Roads Time Series) in the Wadden Sea off List Sylt North Sea in 1992
Semi-quantitive microplankton analysis (Sylt Roads Time Series) in the Wadden Sea off List Sylt North Sea in 1993
Semi-quantitive microplankton analysis (Sylt Roads Time Series) in the Wadden Sea off List Sylt North Sea in 1994
Semi-quantitive microplankton analysis (Sylt Roads Time Series) in the Wadden Sea off List Sylt North Sea in 1995
Semi-quantitive microplankton analysis (Sylt Roads Time Series) in the Wadden Sea off List Sylt North Sea in 1996
Semi-quantitive microplankton analysis (Sylt Roads Time Series) in the Wadden Sea off List Sylt North Sea in 1997
Semi-quantitive microplankton analysis (Sylt Roads Time Series) in the Wadden Sea off List Sylt North Sea in 1998
Semi-quantitive microplankton analysis (Sylt Roads Time Series) in the Wadden Sea off List Sylt North Sea in 1999
Semi-quantitive microplankton analysis (Sylt Roads Time Series) in the Wadden Sea off List Sylt North Sea in 2000
Semi-quantitive microplankton analysis (Sylt Roads Time Series) in the Wadden Sea off List Sylt North Sea in 2001
Semi-quantitive microplankton analysis (Sylt Roads Time Series) in the Wadden Sea off List Sylt North Sea in 2002
Semi-quantitive microplankton analysis (Sylt Roads Time Series) in the Wadden Sea off List Sylt North Sea in 2003
Semi-quantitive microplankton analysis (Sylt Roads Time Series) in the Wadden Sea off List Sylt North Sea in 2004
Semi-quantitive microplankton analysis (Sylt Roads Time Series) in the Wadden Sea off List Sylt North Sea in 2005
Semi-quantitive microplankton analysis (Sylt Roads Time Series) in the Wadden Sea off List Sylt North Sea in 2006
Semi-quantitive microplankton analysis (Sylt Roads Time Series) in the Wadden Sea off List Sylt North Sea in 2007
Semi-quantitive microplankton analysis (Sylt Roads Time Series) in the Wadden Sea off List Sylt North Sea in 2008
Semi-quantitive microplankton analysis (Sylt Roads Time Series) in the Wadden Sea off List Sylt North Sea in 2009
Semi-quantitive microplankton analysis (Sylt Roads Time Series) in the Wadden Sea off List Sylt North Sea in 2010
Semi-quantitive microplankton analysis (Sylt Roads Time Series) in the Wadden Sea off List Sylt North Sea in 2011
Semi-quantitive microplankton analysis (Sylt Roads Time Series) in the Wadden Sea off List Sylt North Sea in 2012
Semi-quantitive microplankton analysis (Sylt Roads Time Series) in the Wadden Sea off List Sylt North Sea in 2013
SHARK - Marine phytoplankton monitoring in Sweden since 1983
Siliceous microfossil occurrence, Site 177-1091
Siliceous microfossil occurrence, Site 177-1092
Siliceous microfossil occurrence, Site 177-1093
Siliceous microfossil occurrence, Site 177-1094
South American Antarctic Marine Biodiversity Literature
Southeast BR Mangrove
SP-Algae - Herbário do Estado "Maria Eneyda P. Kaufmann Fidalgo - Coleção de Algas, http://splink.cria.org.br/manager/detail?resource=SP-Algae
Spring Phytoplankton Assemblages in the Southern Ocean Between Australia and Antarctica (CLIVAR-SR3)
Taxonomic Information System for the Belgian coastal area
The Australian Phytoplankton Database (1844 onwards)
The Canadian Fisheries Expedition 1914-1915: Investigations in the Gulf of St. Lawrence and Atlantic waters of Canada
The cryptogamy collection (PC) at the Herbarium of the Muséum national d'Histoire Naturelle (MNHN - Paris)
The Diatom Collection of Franz Josef Weinzierl at the Botanische Staatssammlung München
The national database for marine data (MADS)
The New York Botanical Garden Herbarium (NY)
Trap data GBN3, 3921 m
Trap data GBZ4, 696 m
Trap data WR2, 1648 m
Trap data WR2, 599 m
UFPE_Oceanography_Zooplankton_Research
University of California Museum of Paleontology
UTEX Culture Collection of Algae at The University of Texas Living Algae Holdings
World Ocean Database 2009
Zooplankton and phytoplankton densities in the oyster farms of Gazi Creek (Kenya) sampled in October 1992

## Sheet: shared datasets
Bay of Fundy Species List
Benthic Microalgae Chukchi Sea 1972
Biological observations from the Discovery Investigations 1925-1952
Biota occurrence data from plankton surveys around New Zealand
Comportamiento espacio-temporal de la densidad fitoplanctónica en el año 2015 Magdalena Colombia
Composición y distribución espacial del fitoplancton en aguas oceánicas del Caribe sur colombiano
CSIRO Australian National Algae Culture Collection Global 1949-2008
Diatoms from SAZ Sediment traps
Diet Tidal and Vertical Variations of Phytoplankton and Its Environment in Frobisher Bay Canada 1980 and 1981
IMOS - AusCPR: Phytoplankton Abundance
IndOBIS Indian Ocean Node of OBIS
International Polar Year and Census of Antarctic Marine Life Ross Sea voyage (TAN0802) biodiversity data
MICROBIS database
Phytoplankton data collected from a diurnal station in Sevastopol Bay (Black Sea) during 1952
Phytoplankton from the White Sea Barents Sea Norwegian Sea and Arctic Basin 1993-2003
Phytoplankton Species Composition Abundance and Cell Size in San Francisco Bay: Microscopic Analyses of USGS Samples Collected 1992-2014
Records from the NIWA AllSeaBio marine biology database
South American Antarctic Marine Biodiversity Literature
Spring Phytoplankton Assemblages in the Southern Ocean Between Australia and Antarctica (CLIVAR-SR3)
The Australian Phytoplankton Database (1844 onwards)
