# Supplementary material for: Global distribution and diversity of Chaetoceros (Bacillariophyta, Mediophyceae): integration of classical and novel strategies
Source: PeerJ. 2019 Aug 19;7:e7410. doi: 10.7717/peerj.7410 (PMC6705385; doi:10.7717/peerj.7410)
Supplement: Table S9 — Stations in which Chaetoceros samples were not found are highlighted in red. OSD and TARA stations are listed in ”OSD stations” and ”TARA stations” respectively. [file peerj-07-7410-s009.xlsx]

## Sheet: OSD stations
Table S9. List of OSD and Tara Oceans stations. Stations in which Chaetoceros samples were not found are highlighted in red. OSD and Tara Oceans stations are listed in the sheets "OSD stations" and "Tara Oceans stations" respectively.
Station	Locality	Latitude	Longitude
OSD1	English Channel	50151	-4.13
OSD2	English Channel	48778	-3938
OSD3	North Sea	54182	7.9
OSD4	Tyrrhenian Sea	40808	14.25
OSD5	1m depth Aegean Sea	35661	24.99
OSD6	Balearic Sea	41667	2.8
OSD7	South Pacific Ocean	-17289	-149.54
OSD9	NorthPacific Ocean_Southern California	33.55	-118.4
OSD10	North Atlantic OceanLake Eire	41.84	-83.19
OSD13	Black Sea	43176	27909
OSD14	Mediterranean Sea - Western Basin	42.49	3.15
OSD15	surface NWMediterranean Sea	43686	7316
OSD17	North Sea	51435	2811
OSD18	Mediterranean Sea - Eastern Basin	35364	33.29
OSD19	Mediterranean Sea - Eastern Basin	35	33
OSD20	surface North Atlantic OceanIceland	64208	-22015
OSD21	Adriatic Sea	45.08	13.61
OSD22	Mediterranean Sea - Western Basin	43226	5175
OSD24	Alboran Sea	35193	-2.88
OSD25	Alboran Sea	35086	-2215
OSD26	Strait of Gibraltar	35.82	-5.75
OSD28	Bay of Bengal	16803	-88082
OSD29	North Atlantic OceanFlorida	27469	-80283
OSD30	Gulf of Finland	59882	23254
OSD34	Mediterranean Sea - Eastern Basin	31217	29967
OSD35	North Atlantic OceanCheasapeake Bay(US)	38679	-76174
OSD36	North Atlantic OceanDelaware(US)	39332	-75.47
OSD37	North Atlantic OceanFlorida Coral	26103	-80093
OSD38	North Atlantic OceanFlorida Coral	24745	-80784
OSD39	North Atlantic OceanNorth	32752	-79.9
OSD41	Coastal Waters of Southeast Alaska and British Columbia	48041	-123026
OSD42	Tyrrhenian Sea	38269	15637
OSD43	North Pacific OceanCalifornia Scripps	32867	-117257
OSD45	Gulf of Mexico	27616	-82726
OSD46	Gulf of Mexico	30248	-88748
OSD47	Adriatic Sea	45502	12418
OSD48	Adriatic Sea	45412	12526
OSD49	Adriatic Sea	45326	13332
OSD50	Bay of Biscay	43333	-1925
OSD51	Caribbean Sea	9348	-82266
OSD52	Red Sea	27025	33913
OSD53	Red Sea	27042	33907
OSD54	North Atlantic OceanMaine Booth Bay(Portland)	43844	-69641
OSD55	North Atlantic OceanPortland	43.86	-69578
OSD56	North Pacific OceanHawaii	21289	-156864
OSD57	North Pacific OceanHawaii	21287	-157844
OSD58	North Pacific OceanPICO(northCarolina)	34718	-76671
OSD60	North Atlantic OceanSouth Carolina	33323	-79168
OSD61	North Atlantic OceanMassachusetts	41524	-70672
OSD62	North Sea	53225	-4159
OSD63	Adriatic Sea	45314	12508
OSD64	Black Sea	46442	30776
OSD65	South Pacific Ocean	-36293	174819
OSD69	Adriatic Sea	45457	12.26
OSD70	Adriatic Sea	45414	12438
OSD71	South Pacific Ocean	-45744	170771
OSD72	KattegatDenmark	54833	10
OSD73	North Atlantic OceanLima Estuary(Portugal)	41684	-8834
OSD74	North Atlantic OceanDouroEstuary(Portugal)	41142	-8667
OSD76	Adriatic Sea	43948	12935
OSD77	Adriatic Sea	43851	13073
OSD78	Adriatic Sea	43.57	13595
OSD80	Greenland Sea	74.31	-20304
OSD81	North Atlantic OceanSouthPortugal	37005	-7973
OSD90	Ionian Sea	38484	21317
OSD91	North Atlantic OceanOualidiyaMAROCCO	32747	-9037
OSD92	North Atlantic OceanCasablanca	33584	-7701
OSD93	North Atlantic OceanMAROCCO	33.26	-8499
OSD94	Alboran Sea	35086	-2215
OSD95	Singapore Strait	1268	103917
OSD96	North Atlantic OceanEljadidaMAROCCO	37426	-25316
OSD97	North Atlantic OceanFaial Azores	38.53	-28602
OSD98	North Atlantic Ocean?Sao Jorge Azores	38.64	-28.13
OSD99	Adriatic Sea	45701	13.71
OSD100	1m depth Aegean Sea	35.35	25.29
OSD101	North Atlantic OceanMadeira Island	32742	-16711
OSD102	North Atlantic OceanMadeira Island	32646	-16.91
OSD103	North Atlantic OceanMadeira Island	32775	-16829
OSD105	Northwestern PassagesCanada	69023	-105343
OSD106	sea water bottom North Atlantic OceanIceland	65945	-22419
OSD107	North Atlantic OceanLisboa	39.14	-9.38
OSD108	North Atlantic OceanPortugal	38757	-8966
OSD109	North Atlantic OceanPortugal	38677	-9012
OSD110	North Atlantic OceanPortugal	40145	-8869
OSD111	North Atlantic OceanPortugal	40.66	-8704
OSD113	North Atlantic OceanIberian Atlantic	38667	-9437
OSD114	North Atlantic OceanIberian Atlantic	34.41	-9.51
OSD115	North Atlantic OceanPortugal	39134	-9385
OSD116	North Atlantic OceanPortugal	39415	-9219
OSD117	North Atlantic OceanSouthPortugal	37167	-7504
OSD118	Celtic Sea	51742	-8311
OSD122	Gulf of Aqaba	29467	34929
OSD123	Mediterranean Sea - Eastern Basin	32822	32954
OSD124	Japan Sea	34324	135121
OSD125	North Sea	55033	-1433
OSD126	Greenland Sea	66007	-18197
OSD127	Greenland Sea	66008	-18195
OSD128	Greenland Sea	65489	-18061
OSD129	Greenland Sea	65817	-18102
OSD130	Greenland Sea	66132	-18.79
OSD131	Black Sea	42245	27401
OSD132	Mediterranean Sea - Eastern Basin	32069	34843
OSD133	South Atlantic OceanCapetown	-33897	18387
OSD141	North Sea	60161	5115
OSD142	North Atlantic OceanGeorgiaUS	31384	-80867
OSD143	North Atlantic OceanGeorgiaUS	31983	-81017
OSD144	North Pacific OceanHonolulu	21269	-157722
OSD145	North Sea	51361	3119
OSD146	Greenland Sea	78453	-2.83
OSD147	Bay of Bengal	8522	81052
OSD148	North Sea	53581	8149
OSD149	South Atlantic OceanUruguay	-34.37	-54.16
OSD150	South Atlantic OceanUruguay	-34676	-54275
OSD151	South Atlantic OceanUruguay	-34.42	-54.16
OSD152	10 m depth North Atlantic OceanNovaScotia	44694	-63.64
OSD153	North Atlantic OceanPorugal	36998	-7973
OSD154	Bay of BiscayFrance	44667	-1167
OSD155	12-8m-depth SkagerrakGr?nland	59816	10599
OSD156	11-8m depth SkagerrakGr?nland	59.9	10.72
OSD157	1m depth SkagerrakGr?nland	59622	10628
OSD158	NorthAtlantic	37433	-25.19
OSD159	CelticSea	48359	-4552
OSD162	North Sea	56963	-2103
OSD163	North Sea	58957	-2973
OSD164	North Sea	60143	-1282
OSD165	Inner Seas off the West Coast of Scotland	57.85	-5.65
OSD166	Mediterranean Sea - Western Basin	43433	2.9
OSD168	Aegean Sea	38413	27034
OSD167	Greenland Sea	65706	-18118
OSD169	North Sea	51796	1013
OSD170	North Sea	51.27	2905
OSD171	North Sea	51307	2849
OSD172	North Sea	51375	3218
OSD173	North Sea	51441	3.14
OSD174	North Sea	51472	3059
OSD175	North Sea	51335	2502
OSD176	North Sea	51278	2614
OSD177	North Sea	51186	2702
OSD178	North Sea	51.58	2.79
OSD182	North Sea	51458	2.35
OSD183	North Sea	51748	2698
OSD184	North Sea	51683	2415
OSD185	North Sea	51482	2451
OSD186	North Atlantic OceanBaltimore	38886	-76542

## Sheet: Tara Oceans stations
Station	Locality	Latitude	Longitude
TARA_001	(ESP) Spain	44415	-9833
TARA_002	(PRT) Portugal	39038	-10790
TARA_003	(PRT) Portugal	36672	-10421
TARA_004	(PRT) Portugal	36563	-6553
TARA_005	(ESP) Spain	36030	-4406
TARA_006	(ESP) Spain	36529	-4251
TARA_007	(ESP) Spain	37031	1948
TARA_008	(IW) International waters	38011	3966
TARA_009	(ESP) Spain	39112	5820
TARA_010	(ESP) Spain	40668	2865
TARA_011	(ESP) Spain	41666	2798
TARA_012	(FRA) France	43348	7899
TARA_013	(TUN) Tunisia	37987	8068
TARA_014	(ITA) Italy	39902	12858
TARA_015	(ITA) Italy	38933	14530
TARA_016	(ITA) Italy	37398	15454
TARA_017	(MLT) Malta	36258	14306
TARA_018	(MLT) Malta	35756	14288
TARA_019	(LBY) Libya	34216	13865
TARA_020	(MLT) Malta	34451	14973
TARA_021	(ITA) Italy	37511	17284
TARA_022	(ITA) Italy	39729	17400
TARA_023	(HRV) Croatia	42176	17729
TARA_024	(HRV) Croatia	42457	17956
TARA_025	(GRC) Greece	39333	19421
TARA_026	(GRC) Greece	38431	20188
TARA_027	(CYP) Cyprus	34094	32934
TARA_028	(CYP) Cyprus	34278	32985
TARA_029	(LBN) Lebanon	33928	35342
TARA_030	(CYP) Cyprus	33929	32789
TARA_031	(SAU) Saudi Arabia	27151	34819
TARA_032	(SAU) Saudi Arabia	23391	37254
TARA_033	(SAU) Saudi Arabia	22057	38218
TARA_034	(SAU) Saudi Arabia	18445	39884
TARA_036	(IW) International waters	20824	63524
TARA_037	(IW) International waters	20828	63600
TARA_038	(IW) International waters	19017	64576
TARA_039	(IW) International waters	18647	66463
TARA_040	(IW) International waters	17500	67984
TARA_041	(IW) International waters	14582	70011
TARA_042	(MDV) TheÂ Maldives	5992	73919
TARA_043	(MDV) TheÂ Maldives	4660	73489
TARA_044	(MDV) TheÂ Maldives	2806	71520
TARA_045	(MDV) TheÂ Maldives	0.941	71710
TARA_046	(MDV) TheÂ Maldives	-0.659	73162
TARA_047	(MDV) TheÂ Maldives	-2042	72164
TARA_048	(IW) International waters	-9408	66320
TARA_049	(MUS) Mauritius	-16808	59504
TARA_050	(FRA) France	-21476	56795
TARA_051	(FRA) France	-21476	54283
TARA_052	(FRA) France	-17023	53508
TARA_053	(MDG) Madagascar	-13070	46923
TARA_054	(FRA) France	-12813	45226
TARA_055	(FRA) France	-14219	43985
TARA_056	(MDG) Madagascar	-15332	43290
TARA_057	(FRA) France	-17026	42742
TARA_058	(FRA) France	-17455	42320
TARA_059	(MOZ) Mozambique	-19063	40803
TARA_060	(FRA) France	-20234	40090
TARA_061	(FRA) France	-21366	39547
TARA_062	(FRA) France	-22339	40182
TARA_063	(FRA) France	-24482	38688
TARA_064	(FRA) France	-29508	37929
TARA_065	(ZAF) South Africa	-35226	26334
TARA_066	(ZAF) South Africa	-34905	18016
TARA_067	(ZAF) South Africa	-32292	17206
TARA_068	(IW) International waters	-31039	4620
TARA_069	(IW) International waters	-24126	2609
TARA_070	(IW) International waters	-20229	-3413
TARA_071	(IW) International waters	-9213	-9728
TARA_072	(IW) International waters	-8691	-18006
TARA_073	(IW) International waters	-12504	-24434
TARA_074	(IW) International waters	-16036	-28957
TARA_075	(IW) International waters	-18000	-32718
TARA_076	(IW) International waters	-21029	-35231
TARA_077	(BRA) Brazil	-24577	-43840
TARA_078	(IW) International waters	-30158	-43323
TARA_079a	(IW) International waters	-34458	-47660
TARA_079b	(URY) Uruguay	-35502	-55164
TARA_080	(IW) International waters	-40698	-51952
TARA_081	(IW) International waters	-44497	-52214
TARA_082	(IW) International waters	-47165	-58012
TARA_083	(ARG) Argentina	-54418	-65023
TARA_084	(ATA) Antarctica	-60395	-60471
TARA_085	(ATA) Antarctica	-62176	-49503
TARA_086	(ATA) Antarctica	-64309	-53058
TARA_087	(ATA) Antarctica	-63853	-56137
TARA_088	(ATA) Antarctica	-63386	-56806
TARA_089	(ARG) Argentina	-57764	-67419
TARA_090	(CHL) Chile	-39588	-76990
TARA_091	(CHL) Chile	-34174	-73085
TARA_092	(CHL) Chile	-33697	-71977
TARA_093	(CHL) Chile	-33762	-72615
TARA_094	(IW) International waters	-32765	-87093
TARA_095	(IW) International waters	-31386	-93986
TARA_096	(IW) International waters	-29655	-101268
TARA_097	(CHL) Chile	-28169	-107668
TARA_098	(CHL) Chile	-26261	-110992
TARA_099	(IW) International waters	-21141	-104852
TARA_100	(IW) International waters	-13162	-96283
TARA_101	(IW) International waters	-8627	-89485
TARA_102	(IW) International waters	-5218	-85270
TARA_103	(IW) International waters	-1498	-84584
TARA_104	(IW) International waters	-0.991	-84592
TARA_105	(IW) International waters	-0.491	-84588
TARA_106	(IW) International waters	0.037	-84620
TARA_107	(IW) International waters	0.488	-84581
TARA_108	(IW) International waters	1013	-84583
TARA_109	(IW) International waters	1800	-84545
TARA_110	(IW) International waters	-1913	-84616
TARA_111	(IW) International waters	-16932	-100662
TARA_112	(GBR) United Kingdom	-23220	-129578
TARA_113	(FRA) France	-23114	-134920
TARA_114	(FRA) France	-23130	-134912
TARA_115	(FRA) France	-23216	-134931
TARA_116	(FRA) France	-23217	-134931
TARA_117	(FRA) France	-23129	-135016
TARA_118	(FRA) France	-23129	-135009
TARA_119	(FRA) France	-23012	-134912
TARA_120	(FRA) France	-23012	-134912
TARA_121	(FRA) France	-23050	-134959
TARA_122	(FRA) France	-8969	-139338
TARA_123	(FRA) France	-8878	-140304
TARA_124	(FRA) France	-8999	-140588
TARA_125	(FRA) France	-8890	-142610
TARA_126	(KIR) Kiribati	-11975	-151208
TARA_127	(KIR) Kiribati	-6620	-152568
TARA_128	(IW) International waters	-0.469	-153305
TARA_129	(IW) International waters	6732	-153089
TARA_130	(IW) International waters	11265	-152462
TARA_131	(USA) United States	22746	-158052
TARA_132	(IW) International waters	31506	-159014
TARA_133	(USA) United States	35343	-127750
TARA_134	(USA) United States	32667	-121986
TARA_135	(USA) United States	32983	-121832
TARA_136	(IW) International waters	17022	-118914
TARA_137	(IW) International waters	14161	-116699
TARA_138	(IW) International waters	6216	-103017
TARA_139	(IW) International waters	6491	-95449
TARA_140	(PAN) Panama	7471	-79312
TARA_141	(PAN) Panama	9834	-80086
TARA_142	(IW) International waters	25602	-88417
TARA_143	(USA) United States	29885	-79682
TARA_144	(USA) United States	36369	-72815
TARA_145	(USA) United States	39163	-70076
TARA_146	(IW) International waters	34731	-71248
TARA_147	(GBR) United Kingdom	32954	-66533
TARA_148	(GBR) United Kingdom	31782	-64145
TARA_148b	(IW) International waters	34027	-56876
TARA_149	(IW) International waters	34098	-49840
TARA_150	(IW) International waters	35800	-37102
TARA_151	(PRT) Portugal	36194	-28801
TARA_152	(IW) International waters	43668	-16662
TARA_153	(IW) International waters	44034	-16564
TARA_154	(ESP) Spain	44354	-10094
TARA_155	(IW) International waters	54597	-16755
TARA_156	(DEN) Denmark, Feroe Isl.	60923	-7879
TARA_157	(IW) International waters	65676	-1759
TARA_158	(IW) International waters	67193	0.374
TARA_159	(IW) International waters	68994	2157
TARA_160	(IW) International waters	70373	3678
TARA_161	(IW) International waters	72375	3935
TARA_162	(IW) International waters	74247	3908
TARA_163	(IW) International waters	76078	1689
TARA_164	(NOR) Norway	74597	6554
TARA_165	(NOR) Norway	73444	10233
TARA_166	(NOR) Norway	71208	14662
TARA_167	(RUS) Russian Federation	71033	38714
TARA_168	(RUS) Russian Federation	72582	44126
TARA_169	(RUS) Russian Federation	74390	47159
TARA_170	(RUS) Russian Federation	75949	51914
TARA_171	(RUS) Russian Federation	77588	58558
TARA_172	(RUS) Russian Federation	77967	67897
TARA_173	(RUS) Russian Federation	78939	75345
TARA_174	(RUS) Russian Federation	79045	71624
TARA_175	(RUS) Russian Federation	79343	66384
TARA_176	(RUS) Russian Federation	77756	67391
TARA_177	(RUS) Russian Federation	77901	71747
TARA_178	(RUS) Russian Federation	77234	73235
TARA_179	(RUS) Russian Federation	75542	74572
TARA_180	(RUS) Russian Federation	75172	75459
TARA_181	(RUS) Russian Federation	73966	77069
TARA_182	(RUS) Russian Federation	75976	78563
TARA_183	(RUS) Russian Federation	77454	75734
TARA_184	(RUS) Russian Federation	79028	69692
TARA_185	(RUS) Russian Federation	79675	60902
TARA_186	(RUS) Russian Federation	79070	74215
TARA_187	(RUS) Russian Federation	78142	86523
TARA_188	(RUS) Russian Federation	78304	91725
TARA_189	(RUS) Russian Federation	78022	116482
TARA_190	(RUS) Russian Federation	73858	145846
TARA_191	(RUS) Russian Federation	71549	160961
TARA_192	(RUS) Russian Federation	70733	166310
TARA_193	(RUS) Russian Federation	71115	174901
TARA_194	(USA) United States	73336	-168518
TARA_195	(USA) United States	72213	-159703
TARA_196	(USA) United States	71895	-154934
TARA_197	(USA) United States	71336	-148662
TARA_198	(USA) United States	71474	-141884
TARA_199	(USA) United States	70396	-140334
TARA_200	(CAN) Canada	71986	-93543
TARA_201	(CAN) Canada	74329	-85729
TARA_202	(CAN) Canada	73117	-85053
TARA_203	(CAN) Canada	73070	-80364
TARA_204	(CAN) Canada	72676	-78443
TARA_205	(CAN) Canada	72423	-71952
TARA_206	(DEN) Denmark, Greenland	70939	-53622
TARA_207	(DEN) Denmark, Greenland	69207	-52852
TARA_208	(DEN) Denmark, Greenland	69107	-51578
TARA_209	(DEN) Denmark, Greenland	64728	-53467
TARA_210	(DEN) Denmark, Greenland	61544	-55985
